# Supplementary material for: Differential expression of pyroptosis-related genes in the hippocampus of patients with Alzheimer’s disease
Source: BMC Med Genomics. 2023 Mar 14;16:56. doi: 10.1186/s12920-023-01479-x (PMC10012531; doi:10.1186/s12920-023-01479-x)
Supplement: Supplementary file 10 — Supplementary Material 10 [file 12920_2023_1479_MOESM10_ESM.xls]

## Sheet: GSE36980
Accession	Title	SampleType	Description	DataProcessing	PlatformRef	ChannelCount	Source	Organism	Sex	tissue	age
GSM907792	AD_FC, biological rep1	RNA		CEL files were imported into Affymetrix Expression Console Software, and CHP files were generated.	GPL6244	1	Frontal cortex of AD brain	Homo sapiens	M	Frontal cortex	84
GSM907793	AD_FC, biological rep2	RNA		CEL files were imported into Affymetrix Expression Console Software, and CHP files were generated.	GPL6244	1	Frontal cortex of AD brain	Homo sapiens	F	Frontal cortex	105
GSM907794	AD_FC, biological rep3	RNA		CEL files were imported into Affymetrix Expression Console Software, and CHP files were generated.	GPL6244	1	Frontal cortex of AD brain	Homo sapiens	F	Frontal cortex	88
GSM907795	AD_FC, biological rep4	RNA		CEL files were imported into Affymetrix Expression Console Software, and CHP files were generated.	GPL6244	1	Frontal cortex of AD brain	Homo sapiens	M	Frontal cortex	88
GSM907796	AD_FC, biological rep5	RNA		CEL files were imported into Affymetrix Expression Console Software, and CHP files were generated.	GPL6244	1	Frontal cortex of AD brain	Homo sapiens	F	Frontal cortex	91
GSM907797	AD_FC, biological rep6	RNA		CEL files were imported into Affymetrix Expression Console Software, and CHP files were generated.	GPL6244	1	Frontal cortex of AD brain	Homo sapiens	F	Frontal cortex	95
GSM907798	AD_FC, biological rep7	RNA		CEL files were imported into Affymetrix Expression Console Software, and CHP files were generated.	GPL6244	1	Frontal cortex of AD brain	Homo sapiens	F	Frontal cortex	92
GSM907799	AD_FC, biological rep8	RNA		CEL files were imported into Affymetrix Expression Console Software, and CHP files were generated.	GPL6244	1	Frontal cortex of AD brain	Homo sapiens	F	Frontal cortex	95
GSM907800	AD_FC, biological rep9	RNA		CEL files were imported into Affymetrix Expression Console Software, and CHP files were generated.	GPL6244	1	Frontal cortex of AD brain	Homo sapiens	F	Frontal cortex	101
GSM907801	AD_FC, biological rep10	RNA		CEL files were imported into Affymetrix Expression Console Software, and CHP files were generated.	GPL6244	1	Frontal cortex of AD brain	Homo sapiens	M	Frontal cortex	94
GSM907802	AD_FC, biological rep11	RNA		CEL files were imported into Affymetrix Expression Console Software, and CHP files were generated.	GPL6244	1	Frontal cortex of AD brain	Homo sapiens	M	Frontal cortex	89
GSM907803	AD_FC, biological rep12	RNA		CEL files were imported into Affymetrix Expression Console Software, and CHP files were generated.	GPL6244	1	Frontal cortex of AD brain	Homo sapiens	F	Frontal cortex	100
GSM907804	AD_FC, biological rep13	RNA		CEL files were imported into Affymetrix Expression Console Software, and CHP files were generated.	GPL6244	1	Frontal cortex of AD brain	Homo sapiens	M	Frontal cortex	99
GSM907805	AD_FC, biological rep14	RNA		CEL files were imported into Affymetrix Expression Console Software, and CHP files were generated.	GPL6244	1	Frontal cortex of AD brain	Homo sapiens	M	Frontal cortex	83
GSM907806	AD_FC, biological rep15	RNA		CEL files were imported into Affymetrix Expression Console Software, and CHP files were generated.	GPL6244	1	Frontal cortex of AD brain	Homo sapiens	M	Frontal cortex	90
GSM907807	non-AD_FC, biological rep1	RNA		CEL files were imported into Affymetrix Expression Console Software, and CHP files were generated.	GPL6244	1	Frontal cortex of non-AD brain	Homo sapiens	M	Frontal cortex	80
GSM907808	non-AD_FC, biological rep2	RNA		CEL files were imported into Affymetrix Expression Console Software, and CHP files were generated.	GPL6244	1	Frontal cortex of non-AD brain	Homo sapiens	F	Frontal cortex	77
GSM907809	non-AD_FC, biological rep3	RNA		CEL files were imported into Affymetrix Expression Console Software, and CHP files were generated.	GPL6244	1	Frontal cortex of non-AD brain	Homo sapiens	F	Frontal cortex	87
GSM907810	non-AD_FC, biological rep4	RNA		CEL files were imported into Affymetrix Expression Console Software, and CHP files were generated.	GPL6244	1	Frontal cortex of non-AD brain	Homo sapiens	F	Frontal cortex	80
GSM907811	non-AD_FC, biological rep5	RNA		CEL files were imported into Affymetrix Expression Console Software, and CHP files were generated.	GPL6244	1	Frontal cortex of non-AD brain	Homo sapiens	F	Frontal cortex	84
GSM907812	non-AD_FC, biological rep6	RNA		CEL files were imported into Affymetrix Expression Console Software, and CHP files were generated.	GPL6244	1	Frontal cortex of non-AD brain	Homo sapiens	F	Frontal cortex	86
GSM907813	non-AD_FC, biological rep7	RNA		CEL files were imported into Affymetrix Expression Console Software, and CHP files were generated.	GPL6244	1	Frontal cortex of non-AD brain	Homo sapiens	M	Frontal cortex	77
GSM907814	non-AD_FC, biological rep8	RNA		CEL files were imported into Affymetrix Expression Console Software, and CHP files were generated.	GPL6244	1	Frontal cortex of non-AD brain	Homo sapiens	M	Frontal cortex	55
GSM907815	non-AD_FC, biological rep9	RNA		CEL files were imported into Affymetrix Expression Console Software, and CHP files were generated.	GPL6244	1	Frontal cortex of non-AD brain	Homo sapiens	F	Frontal cortex	72
GSM907816	non-AD_FC, biological rep10	RNA		CEL files were imported into Affymetrix Expression Console Software, and CHP files were generated.	GPL6244	1	Frontal cortex of non-AD brain	Homo sapiens	M	Frontal cortex	82
GSM907817	non-AD_FC, biological rep11	RNA		CEL files were imported into Affymetrix Expression Console Software, and CHP files were generated.	GPL6244	1	Frontal cortex of non-AD brain	Homo sapiens	F	Frontal cortex	78
GSM907818	non-AD_FC, biological rep12	RNA		CEL files were imported into Affymetrix Expression Console Software, and CHP files were generated.	GPL6244	1	Frontal cortex of non-AD brain	Homo sapiens	M	Frontal cortex	83
GSM907819	non-AD_FC, biological rep13	RNA		CEL files were imported into Affymetrix Expression Console Software, and CHP files were generated.	GPL6244	1	Frontal cortex of non-AD brain	Homo sapiens	M	Frontal cortex	80
GSM907820	non-AD_FC, biological rep14	RNA		CEL files were imported into Affymetrix Expression Console Software, and CHP files were generated.	GPL6244	1	Frontal cortex of non-AD brain	Homo sapiens	M	Frontal cortex	89
GSM907821	non-AD_FC, biological rep15	RNA		CEL files were imported into Affymetrix Expression Console Software, and CHP files were generated.	GPL6244	1	Frontal cortex of non-AD brain	Homo sapiens	F	Frontal cortex	100
GSM907822	non-AD_FC, biological rep16	RNA		CEL files were imported into Affymetrix Expression Console Software, and CHP files were generated.	GPL6244	1	Frontal cortex of non-AD brain	Homo sapiens	M	Frontal cortex	77
GSM907823	non-AD_FC, biological rep17	RNA		CEL files were imported into Affymetrix Expression Console Software, and CHP files were generated.	GPL6244	1	Frontal cortex of non-AD brain	Homo sapiens	M	Frontal cortex	74
GSM907824	non-AD_FC, biological rep18	RNA		CEL files were imported into Affymetrix Expression Console Software, and CHP files were generated.	GPL6244	1	Frontal cortex of non-AD brain	Homo sapiens	F	Frontal cortex	81
GSM907825	AD_TC, biological rep1	RNA		CEL files were imported into Affymetrix Expression Console Software, and CHP files were generated.	GPL6244	1	Temporal cortex of AD brain	Homo sapiens	M	Temporal cortex	84
GSM907826	AD_TC, biological rep2	RNA		CEL files were imported into Affymetrix Expression Console Software, and CHP files were generated.	GPL6244	1	Temporal cortex of AD brain	Homo sapiens	F	Temporal cortex	88
GSM907827	AD_TC, biological rep3	RNA		CEL files were imported into Affymetrix Expression Console Software, and CHP files were generated.	GPL6244	1	Temporal cortex of AD brain	Homo sapiens	F	Temporal cortex	95
GSM907828	AD_TC, biological rep4	RNA		CEL files were imported into Affymetrix Expression Console Software, and CHP files were generated.	GPL6244	1	Temporal cortex of AD brain	Homo sapiens	M	Temporal cortex	88
GSM907829	AD_TC, biological rep5	RNA		CEL files were imported into Affymetrix Expression Console Software, and CHP files were generated.	GPL6244	1	Temporal cortex of AD brain	Homo sapiens	F	Temporal cortex	91
GSM907830	AD_TC, biological rep6	RNA		CEL files were imported into Affymetrix Expression Console Software, and CHP files were generated.	GPL6244	1	Temporal cortex of AD brain	Homo sapiens	F	Temporal cortex	95
GSM907831	AD_TC, biological rep7	RNA		CEL files were imported into Affymetrix Expression Console Software, and CHP files were generated.	GPL6244	1	Temporal cortex of AD brain	Homo sapiens	F	Temporal cortex	95
GSM907832	AD_TC, biological rep8	RNA		CEL files were imported into Affymetrix Expression Console Software, and CHP files were generated.	GPL6244	1	Temporal cortex of AD brain	Homo sapiens	M	Temporal cortex	89
GSM907833	AD_TC, biological rep9	RNA		CEL files were imported into Affymetrix Expression Console Software, and CHP files were generated.	GPL6244	1	Temporal cortex of AD brain	Homo sapiens	M	Temporal cortex	83
GSM907834	AD_TC, biological rep10	RNA		CEL files were imported into Affymetrix Expression Console Software, and CHP files were generated.	GPL6244	1	Temporal cortex of AD brain	Homo sapiens	M	Temporal cortex	90
GSM907835	non-AD_TC, biological rep1	RNA		CEL files were imported into Affymetrix Expression Console Software, and CHP files were generated.	GPL6244	1	Temporal cortex of non-AD brain	Homo sapiens	F	Temporal cortex	77
GSM907836	non-AD_TC, biological rep2	RNA		CEL files were imported into Affymetrix Expression Console Software, and CHP files were generated.	GPL6244	1	Temporal cortex of non-AD brain	Homo sapiens	F	Temporal cortex	87
GSM907837	non-AD_TC, biological rep3	RNA		CEL files were imported into Affymetrix Expression Console Software, and CHP files were generated.	GPL6244	1	Temporal cortex of non-AD brain	Homo sapiens	F	Temporal cortex	80
GSM907838	non-AD_TC, biological rep4	RNA		CEL files were imported into Affymetrix Expression Console Software, and CHP files were generated.	GPL6244	1	Temporal cortex of non-AD brain	Homo sapiens	F	Temporal cortex	84
GSM907839	non-AD_TC, biological rep5	RNA		CEL files were imported into Affymetrix Expression Console Software, and CHP files were generated.	GPL6244	1	Temporal cortex of non-AD brain	Homo sapiens	M	Temporal cortex	77
GSM907840	non-AD_TC, biological rep6	RNA		CEL files were imported into Affymetrix Expression Console Software, and CHP files were generated.	GPL6244	1	Temporal cortex of non-AD brain	Homo sapiens	M	Temporal cortex	55
GSM907841	non-AD_TC, biological rep7	RNA		CEL files were imported into Affymetrix Expression Console Software, and CHP files were generated.	GPL6244	1	Temporal cortex of non-AD brain	Homo sapiens	F	Temporal cortex	72
GSM907842	non-AD_TC, biological rep8	RNA		CEL files were imported into Affymetrix Expression Console Software, and CHP files were generated.	GPL6244	1	Temporal cortex of non-AD brain	Homo sapiens	M	Temporal cortex	89
GSM907843	non-AD_TC, biological rep9	RNA		CEL files were imported into Affymetrix Expression Console Software, and CHP files were generated.	GPL6244	1	Temporal cortex of non-AD brain	Homo sapiens	M	Temporal cortex	82
GSM907844	non-AD_TC, biological rep10	RNA		CEL files were imported into Affymetrix Expression Console Software, and CHP files were generated.	GPL6244	1	Temporal cortex of non-AD brain	Homo sapiens	F	Temporal cortex	78
GSM907845	non-AD_TC, biological rep11	RNA		CEL files were imported into Affymetrix Expression Console Software, and CHP files were generated.	GPL6244	1	Temporal cortex of non-AD brain	Homo sapiens	M	Temporal cortex	83
GSM907846	non-AD_TC, biological rep12	RNA		CEL files were imported into Affymetrix Expression Console Software, and CHP files were generated.	GPL6244	1	Temporal cortex of non-AD brain	Homo sapiens	M	Temporal cortex	80
GSM907847	non-AD_TC, biological rep13	RNA		CEL files were imported into Affymetrix Expression Console Software, and CHP files were generated.	GPL6244	1	Temporal cortex of non-AD brain	Homo sapiens	F	Temporal cortex	75
GSM907848	non-AD_TC, biological rep14	RNA		CEL files were imported into Affymetrix Expression Console Software, and CHP files were generated.	GPL6244	1	Temporal cortex of non-AD brain	Homo sapiens	M	Temporal cortex	89
GSM907849	non-AD_TC, biological rep15	RNA		CEL files were imported into Affymetrix Expression Console Software, and CHP files were generated.	GPL6244	1	Temporal cortex of non-AD brain	Homo sapiens	F	Temporal cortex	65
GSM907850	non-AD_TC, biological rep16	RNA		CEL files were imported into Affymetrix Expression Console Software, and CHP files were generated.	GPL6244	1	Temporal cortex of non-AD brain	Homo sapiens	F	Temporal cortex	71
GSM907851	non-AD_TC, biological rep17	RNA		CEL files were imported into Affymetrix Expression Console Software, and CHP files were generated.	GPL6244	1	Temporal cortex of non-AD brain	Homo sapiens	M	Temporal cortex	74
GSM907852	non-AD_TC, biological rep18	RNA		CEL files were imported into Affymetrix Expression Console Software, and CHP files were generated.	GPL6244	1	Temporal cortex of non-AD brain	Homo sapiens	F	Temporal cortex	86
GSM907853	non-AD_TC, biological rep19	RNA		CEL files were imported into Affymetrix Expression Console Software, and CHP files were generated.	GPL6244	1	Temporal cortex of non-AD brain	Homo sapiens	F	Temporal cortex	54
GSM907854	AD_HI, biological rep1	RNA		CEL files were imported into Affymetrix Expression Console Software, and CHP files were generated.	GPL6244	1	Hippocampus of of AD brain	Homo sapiens	F	Hippocampus	88
GSM907855	AD_HI, biological rep2	RNA		CEL files were imported into Affymetrix Expression Console Software, and CHP files were generated.	GPL6244	1	Hippocampus of of AD brain	Homo sapiens	F	Hippocampus	95
GSM907856	AD_HI, biological rep3	RNA		CEL files were imported into Affymetrix Expression Console Software, and CHP files were generated.	GPL6244	1	Hippocampus of of AD brain	Homo sapiens	F	Hippocampus	95
GSM907857	AD_HI, biological rep4	RNA		CEL files were imported into Affymetrix Expression Console Software, and CHP files were generated.	GPL6244	1	Hippocampus of of AD brain	Homo sapiens	F	Hippocampus	100
GSM907858	AD_HI, biological rep5	RNA		CEL files were imported into Affymetrix Expression Console Software, and CHP files were generated.	GPL6244	1	Hippocampus of of AD brain	Homo sapiens	M	Hippocampus	99
GSM907859	AD_HI, biological rep6	RNA		CEL files were imported into Affymetrix Expression Console Software, and CHP files were generated.	GPL6244	1	Hippocampus of of AD brain	Homo sapiens	M	Hippocampus	83
GSM907860	AD_HI, biological rep7	RNA		CEL files were imported into Affymetrix Expression Console Software, and CHP files were generated.	GPL6244	1	Hippocampus of of AD brain	Homo sapiens	M	Hippocampus	90
GSM907861	non-AD_HI, biological rep1	RNA		CEL files were imported into Affymetrix Expression Console Software, and CHP files were generated.	GPL6244	1	Hippocampus of of non-AD brain	Homo sapiens	F	Hippocampus	87
GSM907862	non-AD_HI, biological rep2	RNA		CEL files were imported into Affymetrix Expression Console Software, and CHP files were generated.	GPL6244	1	Hippocampus of of non-AD brain	Homo sapiens	F	Hippocampus	80
GSM907863	non-AD_HI, biological rep3	RNA		CEL files were imported into Affymetrix Expression Console Software, and CHP files were generated.	GPL6244	1	Hippocampus of of non-AD brain	Homo sapiens	F	Hippocampus	84
GSM907864	non-AD_HI, biological rep4	RNA		CEL files were imported into Affymetrix Expression Console Software, and CHP files were generated.	GPL6244	1	Hippocampus of of non-AD brain	Homo sapiens	M	Hippocampus	77
GSM907865	non-AD_HI, biological rep5	RNA		CEL files were imported into Affymetrix Expression Console Software, and CHP files were generated.	GPL6244	1	Hippocampus of of non-AD brain	Homo sapiens	M	Hippocampus	55
GSM907866	non-AD_HI, biological rep6	RNA		CEL files were imported into Affymetrix Expression Console Software, and CHP files were generated.	GPL6244	1	Hippocampus of of non-AD brain	Homo sapiens	F	Hippocampus	72
GSM907867	non-AD_HI, biological rep7	RNA		CEL files were imported into Affymetrix Expression Console Software, and CHP files were generated.	GPL6244	1	Hippocampus of of non-AD brain	Homo sapiens	F	Hippocampus	78
GSM907868	non-AD_HI, biological rep8	RNA		CEL files were imported into Affymetrix Expression Console Software, and CHP files were generated.	GPL6244	1	Hippocampus of of non-AD brain	Homo sapiens	M	Hippocampus	83
GSM907869	non-AD_HI, biological rep9	RNA		CEL files were imported into Affymetrix Expression Console Software, and CHP files were generated.	GPL6244	1	Hippocampus of of non-AD brain	Homo sapiens	M	Hippocampus	80
GSM907870	non-AD_HI, biological rep10	RNA		CEL files were imported into Affymetrix Expression Console Software, and CHP files were generated.	GPL6244	1	Hippocampus of of non-AD brain	Homo sapiens	M	Hippocampus	74

## Sheet: GSE1297
Accession	Title	SampleType	Description	DataProcessing	PlatformRef	ChannelCount	Source	Organism	age	pmi	braak	mmse	group	Sex	ref #	nft
GSM21203	Severe 701	RNA	Severe AD (MMSE<14); correlation of the expression of each gene was tested with MiniMental Status Examination (MMSE) and neurofibrillary tangle (NFT) scoresKeywords = bioinformaticsKeywords = gene expressionKeywords = memoryKeywords = synaptic plasticityKeywords = myelinKeywords = inflamationKeywords = agingKeywords = behaviorKeywords = Alzheimer'sKeywords = microarray		GPL96	1	hippocampal CA1 tissue	Homo sapiens	85	2.5	6	4	Severe	M	701	21
GSM21204	Incipient 715	RNA	Incipient AD (MMSE 20-26); correlation of the expression of each gene was tested with MiniMental Status Examination (MMSE) and neurofibrillary tangle (NFT) scoresKeywords = bioinformaticsKeywords = gene expressionKeywords = memoryKeywords = synaptic plasticityKeywords = myelinKeywords = inflamationKeywords = agingKeywords = behaviorKeywords = Alzheimer'sKeywords = microarray		GPL96	1	hippocampal CA1 tissue	Homo sapiens	101	1.35	5	25	Incipient	F	715	65.8
GSM21205	Incipient 720	RNA	Incipient AD (MMSE 20-26); correlation of the expression of each gene was tested with MiniMental Status Examination (MMSE) and neurofibrillary tangle (NFT) scoresKeywords = bioinformaticsKeywords = gene expressionKeywords = memoryKeywords = synaptic plasticityKeywords = myelinKeywords = inflamationKeywords = agingKeywords = behaviorKeywords = Alzheimer'sKeywords = microarray		GPL96	1	hippocampal CA1 tissue	Homo sapiens	95	6.17	6	29	Incipient	F	720	12
GSM21206	Severe 723	RNA	Severe AD (MMSE<14); correlation of the expression of each gene was tested with MiniMental Status Examination (MMSE) and neurofibrillary tangle (NFT) scoresKeywords = bioinformaticsKeywords = gene expressionKeywords = memoryKeywords = synaptic plasticityKeywords = myelinKeywords = inflamationKeywords = agingKeywords = behaviorKeywords = Alzheimer'sKeywords = microarray		GPL96	1	hippocampal CA1 tissue	Homo sapiens	65	3.05	6	5	Severe	F	723	58.2
GSM21207	Severe 807	RNA	Severe AD (MMSE<14); correlation of the expression of each gene was tested with MiniMental Status Examination (MMSE) and neurofibrillary tangle (NFT) scoresKeywords = bioinformaticsKeywords = gene expressionKeywords = memoryKeywords = synaptic plasticityKeywords = myelinKeywords = inflamationKeywords = agingKeywords = behaviorKeywords = Alzheimer'sKeywords = microarray		GPL96	1	hippocampal CA1 tissue	Homo sapiens	93	3.08	6	11	Severe	M	807	62.5
GSM21208	Severe 819	RNA	Severe AD (MMSE<14); correlation of the expression of each gene was tested with MiniMental Status Examination (MMSE) and neurofibrillary tangle (NFT) scoresKeywords = bioinformaticsKeywords = gene expressionKeywords = memoryKeywords = synaptic plasticityKeywords = myelinKeywords = inflamationKeywords = agingKeywords = behaviorKeywords = Alzheimer'sKeywords = microarray		GPL96	1	hippocampal CA1 tissue	Homo sapiens	79	3	6	11	Severe	F	819	18.5
GSM21209	Moderate 826	RNA	Moderate AD (MMSE14-19); correlation of the expression of each gene was tested with MiniMental Status Examination (MMSE) and neurofibrillary tangle (NFT) scoresKeywords = bioinformaticsKeywords = gene expressionKeywords = memoryKeywords = synaptic plasticityKeywords = myelinKeywords = inflamationKeywords = agingKeywords = behaviorKeywords = Alzheimer'sKeywords = microarray		GPL96	1	hippocampal CA1 tissue	Homo sapiens	85	2.92	6	18	Moderate	F	826	35.2
GSM21210	Moderate 832	RNA	Moderate AD (MMSE14-19); correlation of the expression of each gene was tested with MiniMental Status Examination (MMSE) and neurofibrillary tangle (NFT) scoresKeywords = bioinformaticsKeywords = gene expressionKeywords = memoryKeywords = synaptic plasticityKeywords = myelinKeywords = inflamationKeywords = agingKeywords = behaviorKeywords = Alzheimer'sKeywords = microarray		GPL96	1	hippocampal CA1 tissue	Homo sapiens	89	2.63	5	15	Moderate	F	832	19
GSM21211	Moderate 856	RNA	Moderate AD (MMSE14-19); correlation of the expression of each gene was tested with MiniMental Status Examination (MMSE) and neurofibrillary tangle (NFT) scoresKeywords = bioinformaticsKeywords = gene expressionKeywords = memoryKeywords = synaptic plasticityKeywords = myelinKeywords = inflamationKeywords = agingKeywords = behaviorKeywords = Alzheimer'sKeywords = microarray		GPL96	1	hippocampal CA1 tissue	Homo sapiens	83	2.53	5	17	Moderate	F	856	42
GSM21212	Severe 867	RNA	Severe AD (MMSE<14); correlation of the expression of each gene was tested with MiniMental Status Examination (MMSE) and neurofibrillary tangle (NFT) scoresKeywords = bioinformaticsKeywords = gene expressionKeywords = memoryKeywords = synaptic plasticityKeywords = myelinKeywords = inflamationKeywords = agingKeywords = behaviorKeywords = Alzheimer'sKeywords = microarray		GPL96	1	hippocampal CA1 tissue	Homo sapiens	94	2.72	5	2	Severe	F	867	22.6
GSM21213	Severe 872	RNA	Severe AD (MMSE<14); correlation of the expression of each gene was tested with MiniMental Status Examination (MMSE) and neurofibrillary tangle (NFT) scoresKeywords = bioinformaticsKeywords = gene expressionKeywords = memoryKeywords = synaptic plasticityKeywords = myelinKeywords = inflamationKeywords = agingKeywords = behaviorKeywords = Alzheimer'sKeywords = microarray		GPL96	1	hippocampal CA1 tissue	Homo sapiens	79	3.67	6	2	Severe	F	872	24.6
GSM21214	Moderate 965	RNA	Moderate AD (MMSE14-19); correlation of the expression of each gene was tested with MiniMental Status Examination (MMSE) and neurofibrillary tangle (NFT) scoresKeywords = bioinformaticsKeywords = gene expresionKeywords = memoryKeywords = synaptic plasticityKeywords = myelinKeywords = inflamationKeywords = agingKeywords = behaviorKeywords = Alzheimer'sKeywords = microarray		GPL96	1	hippocampal CA1 tissue	Homo sapiens	82	2.75	5	18	Moderate	F	965	22
GSM21215	Control 976	RNA	Control (MMSE>25); correlation of the expression of each gene was tested with MiniMental Status Examination (MMSE) and neurofibrillary tangle (NFT) scoresKeywords = bioinformaticsKeywords = gene expressionKeywords = memoryKeywords = synaptic plasticityKeywords = myelinKeywords = inflamationKeywords = agingKeywords = behaviorKeywords = Alzheimer'sKeywords = microarray		GPL96	1	hippocampal CA1 tissue	Homo sapiens	85	2	3	30	Control	M	976	8
GSM21216	Incipient 994	RNA	Incipient AD (MMSE 20-26); correlation of the expression of each gene was tested with MiniMental Status Examination (MMSE) and neurofibrillary tangle (NFT) scoresKeywords = bioinformaticsKeywords = gene expressionKeywords = memoryKeywords = synaptic plasticityKeywords = myelinKeywords = inflamationKeywords = agingKeywords = behaviorKeywords = Alzheimer'sKeywords = microarray		GPL96	1	hippocampal CA1 tissue	Homo sapiens	83	2.25	5	26	Incipient	F	994	6.4
GSM21217	Control 1003	RNA	Control (MMSE>25); correlation of the expression of each gene was tested with MiniMental Status Examination (MMSE) and neurofibrillary tangle (NFT) scoresKeywords = bioinformaticsKeywords = gene expressionKeywords = memoryKeywords = synaptic plasticityKeywords = myelinKeywords = inflamationKeywords = agingKeywords = behaviorKeywords = Alzheimer'sKeywords = microarray		GPL96	1	hippocampal CA1 tissue	Homo sapiens	80	2.25	2	26	Control	M	1003	7
GSM21218	Control 1008	RNA	Control (MMSE>25); correlation of the expression of each gene was tested with MiniMental Status Examination (MMSE) and neurofibrillary tangle (NFT) scoresKeywords = bioinformaticsKeywords = gene expressionKeywords = memoryKeywords = synaptic plasticityKeywords = myelinKeywords = inflamationKeywords = agingKeywords = behaviorKeywords = Alzheimer'sKeywords = microarray		GPL96	1	hippocampal CA1 tissue	Homo sapiens	92	2.45	2	26	Control	F	1008	2
GSM21219	Control 1012	RNA	Control (MMSE>25); correlation of the expression of each gene was tested with MiniMental Status Examination (MMSE) and neurofibrillary tangle (NFT) scoresKeywords = bioinformaticsKeywords = gene expressionKeywords = memoryKeywords = synaptic plasticityKeywords = myelinKeywords = inflamationKeywords = agingKeywords = behaviorKeywords = Alzheimer'sKeywords = microarray		GPL96	1	hippocampal CA1 tissue	Homo sapiens	80	3	4	26	Control	M	1012	0.4
GSM21220	Control 1015	RNA	Control (MMSE>25); correlation of the expression of each gene was tested with MiniMental Status Examination (MMSE) and neurofibrillary tangle (NFT) scoresKeywords = bioinformaticsKeywords = gene expressionKeywords = memoryKeywords = synaptic plasticityKeywords = myelinKeywords = inflamationKeywords = agingKeywords = behaviorKeywords = Alzheimer'sKeywords = microarray		GPL96	1	hippocampal CA1 tissue	Homo sapiens	75	3.35	1	29	Control	M	1015	0.4
GSM21221	Control 1018	RNA	Control (MMSE>25); correlation of the expression of each gene was tested with MiniMental Status Examination (MMSE) and neurofibrillary tangle (NFT) scoresKeywords = bioinformaticsKeywords = gene expressionKeywords = memoryKeywords = synaptic plasticityKeywords = myelinKeywords = inflamationKeywords = agingKeywords = behaviorKeywords = Alzheimer'sKeywords = microarray		GPL96	1	hippocampal CA1 tissue	Homo sapiens	97	2.75	3	29	Control	F	1018	4.8
GSM21222	Incipient 1019	RNA	Incipient AD (MMSE 20-26); correlation of the expression of each gene was tested with MiniMental Status Examination (MMSE) and neurofibrillary tangle (NFT) scoresKeywords = bioinformaticsKeywords = gene expressionKeywords = memoryKeywords = synaptic plasticityKeywords = myelinKeywords = inflamationKeywords = agingKeywords = behaviorKeywords = Alzheimer'sKeywords = microarray		GPL96	1	hippocampal CA1 tissue	Homo sapiens	88	2.75	6	24	Incipient	M	1019	5.5
GSM21223	Moderate 1020	RNA	Moderate AD (MMSE14-19); correlation of the expression of each gene was tested with MiniMental Status Examination (MMSE) and neurofibrillary tangle (NFT) scoresKeywords = bioinformaticsKeywords = gene expressionKeywords = memoryKeywords = synaptic plasticityKeywords = myelinKeywords = inflamationKeywords = agingKeywords = behaviorKeywords = Alzheimer'sKeywords = microarray		GPL96	1	hippocampal CA1 tissue	Homo sapiens	79	3	6	18	Moderate	F	1020	15.8
GSM21224	Moderate 1025	RNA	Moderate AD (MMSE14-19); correlation of the expression of each gene was tested with MiniMental Status Examination (MMSE) and neurofibrillary tangle (NFT) scoresKeywords = bioinformaticsKeywords = gene expressionKeywords = memoryKeywords = synaptic plasticityKeywords = myelinKeywords = inflamationKeywords = agingKeywords = behaviorKeywords = Alzheimer'sKeywords = microarray		GPL96	1	hippocampal CA1 tissue	Homo sapiens	81	3.5	6	17	Moderate	M	1025	30.6
GSM21225	Incipient 1029	RNA	Incipient AD (MMSE 20-26); correlation of the expression of each gene was tested with MiniMental Status Examination (MMSE) and neurofibrillary tangle (NFT) scoresKeywords = bioinformaticsKeywords = gene expressionKeywords = memoryKeywords = synaptic plasticityKeywords = myelinKeywords = inflamationKeywords = agingKeywords = behaviorKeywords = Alzheimer'sKeywords = microarray		GPL96	1	hippocampal CA1 tissue	Homo sapiens	91	4	3	25	Incipient	F	1029	7.2
GSM21226	Control 1030	RNA	Control (MMSE>25); correlation of the expression of each gene was tested with MiniMental Status Examination (MMSE) and neurofibrillary tangle (NFT) scoresKeywords = bioinformaticsKeywords = gene expressionKeywords = memoryKeywords = synaptic plasticityKeywords = myelinKeywords = inflamationKeywords = agingKeywords = behaviorKeywords = Alzheimer'sKeywords = microarray		GPL96	1	hippocampal CA1 tissue	Homo sapiens	95	1.75	1	28	Control	M	1030	0
GSM21227	Moderate 1031	RNA	Moderate AD (MMSE14-19); correlation of the expression of each gene was tested with MiniMental Status Examination (MMSE) and neurofibrillary tangle (NFT) scoresKeywords = bioinformaticsKeywords = gene expressionKeywords = memoryKeywords = synaptic plasticityKeywords = myelinKeywords = inflamationKeywords = agingKeywords = behaviorKeywords = Alzheimer'sKeywords = microarray		GPL96	1	hippocampal CA1 tissue	Homo sapiens	86	4.25	6	15	Moderate	F	1031	13.8
GSM21228	Incipient 1034	RNA	Incipient AD (MMSE 20-26); correlation of the expression of each gene was tested with MiniMental Status Examination (MMSE) and neurofibrillary tangle (NFT) scoresKeywords = bioinformaticsKeywords = gene expressionKeywords = memoryKeywords = synaptic plasticityKeywords = myelinKeywords = inflamationKeywords = agingKeywords = behaviorKeywords = Alzheimer'sKeywords = microarray		GPL96	1	hippocampal CA1 tissue	Homo sapiens	88	2.75	5	20	Incipient	M	1034	17.4
GSM21229	Severe 1036	RNA	Severe AD (MMSE<14); correlation of the expression of each gene was tested with MiniMental Status Examination (MMSE) and neurofibrillary tangle (NFT) scoresKeywords = bioinformaticsKeywords = gene expressionKeywords = memoryKeywords = synaptic plasticityKeywords = myelinKeywords = inflamationKeywords = agingKeywords = behaviorKeywords = Alzheimer'sKeywords = microarray		GPL96	1	hippocampal CA1 tissue	Homo sapiens	93	3	6	7	Severe	F	1036	21.5
GSM21230	Moderate 1037	RNA	Moderate AD (MMSE14-19); correlation of the expression of each gene was tested with MiniMental Status Examination (MMSE) and neurofibrillary tangle (NFT) scoresKeywords = bioinformaticsKeywords = gene expressionKeywords = memoryKeywords = synaptic plasticityKeywords = myelinKeywords = inflamationKeywords = agingKeywords = behaviorKeywords = Alzheimer'sKeywords = microarray		GPL96	1	hippocampal CA1 tissue	Homo sapiens	82	4	6	14	Moderate	M	1037	26.5
GSM21231	Control 1039	RNA	Control (MMSE>25); correlation of the expression of each gene was tested with MiniMental Status Examination (MMSE) and neurofibrillary tangle (NFT) scoresKeywords = bioinformaticsKeywords = gene expressionKeywords = memoryKeywords = synaptic plasticityKeywords = myelinKeywords = inflamationKeywords = agingKeywords = behaviorKeywords = Alzheimer'sKeywords = microarray		GPL96	1	hippocampal CA1 tissue	Homo sapiens	77	3.5	1	28	Control	M	1039	0.3
GSM21232	Control 1040	RNA	Control (MMSE>25); correlation of the expression of each gene was tested with MiniMental Status Examination (MMSE) and neurofibrillary tangle (NFT) scoresKeywords = bioinformaticsKeywords = gene expressionKeywords = memoryKeywords = synaptic plasticityKeywords = myelinKeywords = inflamationKeywords = agingKeywords = behaviorKeywords = Alzheimer'sKeywords = microarray		GPL96	1	hippocampal CA1 tissue	Homo sapiens	87	2	2	27	Control	M	1040	1.3
GSM21233	Incipient 1043	RNA	Incipient AD (MMSE 20-26); correlation of the expression of each gene was tested with MiniMental Status Examination (MMSE) and neurofibrillary tangle (NFT) scoresKeywords = bioinformaticsKeywords = gene expressionKeywords = memoryKeywords = synaptic plasticityKeywords = myelinKeywords = inflamationKeywords = agingKeywords = behaviorKeywords = Alzheimer'sKeywords = microarray		GPL96	1	hippocampal CA1 tissue	Homo sapiens	97	4	5	21	Incipient	F	1043	8

## Sheet: GSE28146
Accession	Title	SampleType	Description	DataProcessing	PlatformRef	ChannelCount	Source	Organism	age	Sex	disease status
GSM697308	Control 976	RNA	Control; correlation of the expression of each gene was tested with MiniMental Status Examination (MMSE) and neurofibrillary tangle (NFT) scores	The data were analyzed with Expression Console version 1.1 (MAS 5.0) using Affymetrix default analysis settings and global scaling as normalization method. The trimmed mean target intensity of each array was arbitrarily set to 500.	GPL570	1	laser capture CA1 tissue gray matter from formalin fixed, paraffin embedded specimens	Homo sapiens	85 years old	Male	Control
GSM697309	Control 1003	RNA	Control; correlation of the expression of each gene was tested with MiniMental Status Examination (MMSE) and neurofibrillary tangle (NFT) scores	The data were analyzed with Expression Console version 1.1 (MAS 5.0) using Affymetrix default analysis settings and global scaling as normalization method. The trimmed mean target intensity of each array was arbitrarily set to 500.	GPL570	1	laser capture CA1 tissue gray matter from formalin fixed, paraffin embedded specimens	Homo sapiens	80 years old	Male	Control
GSM697310	Control 1008	RNA	Control; correlation of the expression of each gene was tested with MiniMental Status Examination (MMSE) and neurofibrillary tangle (NFT) scores	The data were analyzed with Expression Console version 1.1 (MAS 5.0) using Affymetrix default analysis settings and global scaling as normalization method. The trimmed mean target intensity of each array was arbitrarily set to 500.	GPL570	1	laser capture CA1 tissue gray matter from formalin fixed, paraffin embedded specimens	Homo sapiens	92 years old	Female	Control
GSM697311	Control 1012	RNA	Control; correlation of the expression of each gene was tested with MiniMental Status Examination (MMSE) and neurofibrillary tangle (NFT) scores	The data were analyzed with Expression Console version 1.1 (MAS 5.0) using Affymetrix default analysis settings and global scaling as normalization method. The trimmed mean target intensity of each array was arbitrarily set to 500.	GPL570	1	laser capture CA1 tissue gray matter from formalin fixed, paraffin embedded specimens	Homo sapiens	80 years old	Male	Control
GSM697312	Control 1015	RNA	Control; correlation of the expression of each gene was tested with MiniMental Status Examination (MMSE) and neurofibrillary tangle (NFT) scores	The data were analyzed with Expression Console version 1.1 (MAS 5.0) using Affymetrix default analysis settings and global scaling as normalization method. The trimmed mean target intensity of each array was arbitrarily set to 500.	GPL570	1	laser capture CA1 tissue gray matter from formalin fixed, paraffin embedded specimens	Homo sapiens	75 years old	Male	Control
GSM697313	Control 1018	RNA	Control; correlation of the expression of each gene was tested with MiniMental Status Examination (MMSE) and neurofibrillary tangle (NFT) scores	The data were analyzed with Expression Console version 1.1 (MAS 5.0) using Affymetrix default analysis settings and global scaling as normalization method. The trimmed mean target intensity of each array was arbitrarily set to 500.	GPL570	1	laser capture CA1 tissue gray matter from formalin fixed, paraffin embedded specimens	Homo sapiens	97 years old	Female	Control
GSM697314	Control 1030	RNA	Control; correlation of the expression of each gene was tested with MiniMental Status Examination (MMSE) and neurofibrillary tangle (NFT) scores	The data were analyzed with Expression Console version 1.1 (MAS 5.0) using Affymetrix default analysis settings and global scaling as normalization method. The trimmed mean target intensity of each array was arbitrarily set to 500.	GPL570	1	laser capture CA1 tissue gray matter from formalin fixed, paraffin embedded specimens	Homo sapiens	95 years old	Male	Control
GSM697315	Control 1040	RNA	Control; correlation of the expression of each gene was tested with MiniMental Status Examination (MMSE) and neurofibrillary tangle (NFT) scores	The data were analyzed with Expression Console version 1.1 (MAS 5.0) using Affymetrix default analysis settings and global scaling as normalization method. The trimmed mean target intensity of each array was arbitrarily set to 500.	GPL570	1	laser capture CA1 tissue gray matter from formalin fixed, paraffin embedded specimens	Homo sapiens	87 years old	Male	Control
GSM697316	Incipient 715	RNA	Incipient AD; correlation of the expression of each gene was tested with MiniMental Status Examination (MMSE) and neurofibrillary tangle (NFT) scores	The data were analyzed with Expression Console version 1.1 (MAS 5.0) using Affymetrix default analysis settings and global scaling as normalization method. The trimmed mean target intensity of each array was arbitrarily set to 500.	GPL570	1	laser capture CA1 tissue gray matter from formalin fixed, paraffin embedded specimens	Homo sapiens	101 years old	Female	Incipient
GSM697317	Incipient 720	RNA	Incipient AD; correlation of the expression of each gene was tested with MiniMental Status Examination (MMSE) and neurofibrillary tangle (NFT) scores	The data were analyzed with Expression Console version 1.1 (MAS 5.0) using Affymetrix default analysis settings and global scaling as normalization method. The trimmed mean target intensity of each array was arbitrarily set to 500.	GPL570	1	laser capture CA1 tissue gray matter from formalin fixed, paraffin embedded specimens	Homo sapiens	95 years old	Female	Incipient
GSM697318	Incipient 994	RNA	Incipient AD; correlation of the expression of each gene was tested with MiniMental Status Examination (MMSE) and neurofibrillary tangle (NFT) scores	The data were analyzed with Expression Console version 1.1 (MAS 5.0) using Affymetrix default analysis settings and global scaling as normalization method. The trimmed mean target intensity of each array was arbitrarily set to 500.	GPL570	1	laser capture CA1 tissue gray matter from formalin fixed, paraffin embedded specimens	Homo sapiens	83 years old	Female	Incipient
GSM697319	Incipient 1019	RNA	Incipient AD; correlation of the expression of each gene was tested with MiniMental Status Examination (MMSE) and neurofibrillary tangle (NFT) scores	The data were analyzed with Expression Console version 1.1 (MAS 5.0) using Affymetrix default analysis settings and global scaling as normalization method. The trimmed mean target intensity of each array was arbitrarily set to 500.	GPL570	1	laser capture CA1 tissue gray matter from formalin fixed, paraffin embedded specimens	Homo sapiens	88 years old	Male	Incipient
GSM697320	Incipient 1029	RNA	Incipient AD; correlation of the expression of each gene was tested with MiniMental Status Examination (MMSE) and neurofibrillary tangle (NFT) scores	The data were analyzed with Expression Console version 1.1 (MAS 5.0) using Affymetrix default analysis settings and global scaling as normalization method. The trimmed mean target intensity of each array was arbitrarily set to 500.	GPL570	1	laser capture CA1 tissue gray matter from formalin fixed, paraffin embedded specimens	Homo sapiens	91 years old	Female	Incipient
GSM697321	Incipient 1034	RNA	Incipient AD; correlation of the expression of each gene was tested with MiniMental Status Examination (MMSE) and neurofibrillary tangle (NFT) scores	The data were analyzed with Expression Console version 1.1 (MAS 5.0) using Affymetrix default analysis settings and global scaling as normalization method. The trimmed mean target intensity of each array was arbitrarily set to 500.	GPL570	1	laser capture CA1 tissue gray matter from formalin fixed, paraffin embedded specimens	Homo sapiens	88 years old	Male	Incipient
GSM697322	Incipient 1043	RNA	Incipient AD; correlation of the expression of each gene was tested with MiniMental Status Examination (MMSE) and neurofibrillary tangle (NFT) scores	The data were analyzed with Expression Console version 1.1 (MAS 5.0) using Affymetrix default analysis settings and global scaling as normalization method. The trimmed mean target intensity of each array was arbitrarily set to 500.	GPL570	1	laser capture CA1 tissue gray matter from formalin fixed, paraffin embedded specimens	Homo sapiens	97 years old	Female	Incipient
GSM697323	Moderate 826	RNA	Moderate AD; correlation of the expression of each gene was tested with MiniMental Status Examination (MMSE) and neurofibrillary tangle (NFT) scores	The data were analyzed with Expression Console version 1.1 (MAS 5.0) using Affymetrix default analysis settings and global scaling as normalization method. The trimmed mean target intensity of each array was arbitrarily set to 500.	GPL570	1	laser capture CA1 tissue gray matter from formalin fixed, paraffin embedded specimens	Homo sapiens	85 years old	Female	Moderate
GSM697324	Moderate 832	RNA	Moderate AD; correlation of the expression of each gene was tested with MiniMental Status Examination (MMSE) and neurofibrillary tangle (NFT) scores	The data were analyzed with Expression Console version 1.1 (MAS 5.0) using Affymetrix default analysis settings and global scaling as normalization method. The trimmed mean target intensity of each array was arbitrarily set to 500.	GPL570	1	laser capture CA1 tissue gray matter from formalin fixed, paraffin embedded specimens	Homo sapiens	89 years old	Female	Moderate
GSM697325	Moderate 856	RNA	Moderate AD; correlation of the expression of each gene was tested with MiniMental Status Examination (MMSE) and neurofibrillary tangle (NFT) scores	The data were analyzed with Expression Console version 1.1 (MAS 5.0) using Affymetrix default analysis settings and global scaling as normalization method. The trimmed mean target intensity of each array was arbitrarily set to 500.	GPL570	1	laser capture CA1 tissue gray matter from formalin fixed, paraffin embedded specimens	Homo sapiens	83 years old	Female	Moderate
GSM697326	Moderate 965	RNA	Moderate AD; correlation of the expression of each gene was tested with MiniMental Status Examination (MMSE) and neurofibrillary tangle (NFT) scores	The data were analyzed with Expression Console version 1.1 (MAS 5.0) using Affymetrix default analysis settings and global scaling as normalization method. The trimmed mean target intensity of each array was arbitrarily set to 500.	GPL570	1	laser capture CA1 tissue gray matter from formalin fixed, paraffin embedded specimens	Homo sapiens	82 years old	Female	Moderate
GSM697327	Moderate 1020	RNA	Moderate AD; correlation of the expression of each gene was tested with MiniMental Status Examination (MMSE) and neurofibrillary tangle (NFT) scores	The data were analyzed with Expression Console version 1.1 (MAS 5.0) using Affymetrix default analysis settings and global scaling as normalization method. The trimmed mean target intensity of each array was arbitrarily set to 500.	GPL570	1	laser capture CA1 tissue gray matter from formalin fixed, paraffin embedded specimens	Homo sapiens	79 years old	Female	Moderate
GSM697328	Moderate 1025	RNA	Moderate AD; correlation of the expression of each gene was tested with MiniMental Status Examination (MMSE) and neurofibrillary tangle (NFT) scores	The data were analyzed with Expression Console version 1.1 (MAS 5.0) using Affymetrix default analysis settings and global scaling as normalization method. The trimmed mean target intensity of each array was arbitrarily set to 500.	GPL570	1	laser capture CA1 tissue gray matter from formalin fixed, paraffin embedded specimens	Homo sapiens	81 years old	Male	Moderate
GSM697329	Moderate 1031	RNA	Moderate AD; correlation of the expression of each gene was tested with MiniMental Status Examination (MMSE) and neurofibrillary tangle (NFT) scores	The data were analyzed with Expression Console version 1.1 (MAS 5.0) using Affymetrix default analysis settings and global scaling as normalization method. The trimmed mean target intensity of each array was arbitrarily set to 500.	GPL570	1	laser capture CA1 tissue gray matter from formalin fixed, paraffin embedded specimens	Homo sapiens	86 years old	Female	Moderate
GSM697330	Moderate 1037	RNA	Moderate AD; correlation of the expression of each gene was tested with MiniMental Status Examination (MMSE) and neurofibrillary tangle (NFT) scores	The data were analyzed with Expression Console version 1.1 (MAS 5.0) using Affymetrix default analysis settings and global scaling as normalization method. The trimmed mean target intensity of each array was arbitrarily set to 500.	GPL570	1	laser capture CA1 tissue gray matter from formalin fixed, paraffin embedded specimens	Homo sapiens	82 years old	Male	Moderate
GSM697331	Severe 701	RNA	Severe AD; correlation of the expression of each gene was tested with MiniMental Status Examination (MMSE) and neurofibrillary tangle (NFT) scores	The data were analyzed with Expression Console version 1.1 (MAS 5.0) using Affymetrix default analysis settings and global scaling as normalization method. The trimmed mean target intensity of each array was arbitrarily set to 500.	GPL570	1	laser capture CA1 tissue gray matter from formalin fixed, paraffin embedded specimens	Homo sapiens	85 years old	Male	Severe
GSM697332	Severe 723	RNA	Severe AD; correlation of the expression of each gene was tested with MiniMental Status Examination (MMSE) and neurofibrillary tangle (NFT) scores	The data were analyzed with Expression Console version 1.1 (MAS 5.0) using Affymetrix default analysis settings and global scaling as normalization method. The trimmed mean target intensity of each array was arbitrarily set to 500.	GPL570	1	laser capture CA1 tissue gray matter from formalin fixed, paraffin embedded specimens	Homo sapiens	65 years old	Female	Severe
GSM697333	Severe 807	RNA	Severe AD; correlation of the expression of each gene was tested with MiniMental Status Examination (MMSE) and neurofibrillary tangle (NFT) scores	The data were analyzed with Expression Console version 1.1 (MAS 5.0) using Affymetrix default analysis settings and global scaling as normalization method. The trimmed mean target intensity of each array was arbitrarily set to 500.	GPL570	1	laser capture CA1 tissue gray matter from formalin fixed, paraffin embedded specimens	Homo sapiens	93 years old	Male	Severe
GSM697334	Severe 819	RNA	Severe AD; correlation of the expression of each gene was tested with MiniMental Status Examination (MMSE) and neurofibrillary tangle (NFT) scores	The data were analyzed with Expression Console version 1.1 (MAS 5.0) using Affymetrix default analysis settings and global scaling as normalization method. The trimmed mean target intensity of each array was arbitrarily set to 500.	GPL570	1	laser capture CA1 tissue gray matter from formalin fixed, paraffin embedded specimens	Homo sapiens	79 years old	Female	Severe
GSM697335	Severe 867	RNA	Severe AD; correlation of the expression of each gene was tested with MiniMental Status Examination (MMSE) and neurofibrillary tangle (NFT) scores	The data were analyzed with Expression Console version 1.1 (MAS 5.0) using Affymetrix default analysis settings and global scaling as normalization method. The trimmed mean target intensity of each array was arbitrarily set to 500.	GPL570	1	laser capture CA1 tissue gray matter from formalin fixed, paraffin embedded specimens	Homo sapiens	94 years old	Female	Severe
GSM697336	Severe 872	RNA	Severe AD; correlation of the expression of each gene was tested with MiniMental Status Examination (MMSE) and neurofibrillary tangle (NFT) scores	The data were analyzed with Expression Console version 1.1 (MAS 5.0) using Affymetrix default analysis settings and global scaling as normalization method. The trimmed mean target intensity of each array was arbitrarily set to 500.	GPL570	1	laser capture CA1 tissue gray matter from formalin fixed, paraffin embedded specimens	Homo sapiens	79 years old	Female	Severe
GSM697337	Severe 1036	RNA	Severe AD; correlation of the expression of each gene was tested with MiniMental Status Examination (MMSE) and neurofibrillary tangle (NFT) scores	The data were analyzed with Expression Console version 1.1 (MAS 5.0) using Affymetrix default analysis settings and global scaling as normalization method. The trimmed mean target intensity of each array was arbitrarily set to 500.	GPL570	1	laser capture CA1 tissue gray matter from formalin fixed, paraffin embedded specimens	Homo sapiens	93 years old	Female	Severe

## Sheet: GSE29378
Accession	Title	SampleType	Description	DataProcessing	PlatformRef	ChannelCount	Source	Organism	regioninhippocampus	apoegenotype(alleles)	chipnumber(batch)	gender	postmorteminterval(hours)	subjectnumber	age(years)	diseaseduration(years)	plaquescore(0-3)	locationonchip	brainbank	braakstage(0-6)
GSM726083	AD - #4147 - hippocampus CA3 - Male - 66yr	RNA	AD - #4147 - hippocampus CA3 - Male - 66yr	The data were normalised using quantile normalisation with normalize.quantiles() in R	GPL6947	1	hippocampus - CA3	Homo sapiens	CA3	NA	5298416043	Male	12.3	4147	66	NA	2	A	VA	NA
GSM726084	Control - #1385 - hippocampus CA3 - Male - 81yr	RNA	Control - #1385 - hippocampus CA3 - Male - 81yr	The data were normalised using quantile normalisation with normalize.quantiles() in R	GPL6947	1	hippocampus - CA3	Homo sapiens	CA3	3,3	5298416043	Male	6	1385	81	NA	1	B	OHSU	2
GSM726085	Control - #3795 - hippocampus CA1 - Female - 72yr	RNA	Control - #3795 - hippocampus CA1 - Female - 72yr	The data were normalised using quantile normalisation with normalize.quantiles() in R	GPL6947	1	hippocampus - CA1	Homo sapiens	CA1	NA	5298416043	Female	14	3795	72	NA	NA	C	VA	NA
GSM726086	Control - #1761 - hippocampus CA1 - Male - 86yr	RNA	Control - #1761 - hippocampus CA1 - Male - 86yr	The data were normalised using quantile normalisation with normalize.quantiles() in R	GPL6947	1	hippocampus - CA1	Homo sapiens	CA1	NA	5298416043	Male	24	1761	86	NA	1	E	OHSU	1
GSM726087	AD - #704 - hippocampus CA1 - Male - 81yr	RNA	AD - #704 - hippocampus CA1 - Male - 81yr	The data were normalised using quantile normalisation with normalize.quantiles() in R	GPL6947	1	hippocampus - CA1	Homo sapiens	CA1	3,4	5298416043	Male	12	704	81	11	3	F	OHSU	5
GSM726088	Control - #1013 - hippocampus CA3 - Male - 90yr	RNA	Control - #1013 - hippocampus CA3 - Male - 90yr	The data were normalised using quantile normalisation with normalize.quantiles() in R	GPL6947	1	hippocampus - CA3	Homo sapiens	CA3	2,3	5298416043	Male	6	1013	90	NA	0	G	OHSU	1
GSM726089	Control - #3740 - hippocampus CA1 - Female - 88yr	RNA	Control - #3740 - hippocampus CA1 - Female - 88yr	The data were normalised using quantile normalisation with normalize.quantiles() in R	GPL6947	1	hippocampus - CA1	Homo sapiens	CA1	NA	5298416043	Female	14	3740	88	NA	NA	H	VA	NA
GSM726090	Control - #1716 - hippocampus CA3 - Male - 90yr	RNA	Control - #1716 - hippocampus CA3 - Male - 90yr	The data were normalised using quantile normalisation with normalize.quantiles() in R	GPL6947	1	hippocampus - CA3	Homo sapiens	CA3	NA	5298416043	Male	4.5	1716	90	NA	0	I	OHSU	1
GSM726091	AD - #4125 - hippocampus CA1 - Female - 61yr	RNA	AD - #4125 - hippocampus CA1 - Female - 61yr	The data were normalised using quantile normalisation with normalize.quantiles() in R	GPL6947	1	hippocampus - CA1	Homo sapiens	CA1	NA	5298416043	Female	17.3	4125	61	NA	3	J	VA	NA
GSM726092	AD - #1440 - hippocampus CA3 - Male - 72yr	RNA	AD - #1440 - hippocampus CA3 - Male - 72yr	The data were normalised using quantile normalisation with normalize.quantiles() in R	GPL6947	1	hippocampus - CA3	Homo sapiens	CA3	3,4	5298416043	Male	7.5	1440	72.6	8	2	K	OHSU	5
GSM726093	AD - #4147 - hippocampus CA1 - Male - 66yr	RNA	AD - #4147 - hippocampus CA1 - Male - 66yr	The data were normalised using quantile normalisation with normalize.quantiles() in R	GPL6947	1	hippocampus - CA1	Homo sapiens	CA1	NA	5298416043	Male	12.3	4147	66	NA	2	L	VA	NA
GSM726094	AD - #1388 - hippocampus CA1 - Male - 67yr	RNA	AD - #1388 - hippocampus CA1 - Male - 67yr	The data were normalised using quantile normalisation with normalize.quantiles() in R	GPL6947	1	hippocampus - CA1	Homo sapiens	CA1	3,3	5298416027	Male	3.5	1388	67.2	8	3	A	OHSU	6
GSM726095	AD - #1580 - hippocampus CA3 - Male - 90yr	RNA	AD - #1580 - hippocampus CA3 - Male - 90yr	The data were normalised using quantile normalisation with normalize.quantiles() in R	GPL6947	1	hippocampus - CA3	Homo sapiens	CA3	3,4	5298416027	Male	3	1580	90	5	3	B	OHSU	6
GSM726096	AD - #1167 - hippocampus CA3 - Male - 68yr	RNA	AD - #1167 - hippocampus CA3 - Male - 68yr	The data were normalised using quantile normalisation with normalize.quantiles() in R	GPL6947	1	hippocampus - CA3	Homo sapiens	CA3	NA	5298416027	Male	9.5	1167	68	8	3	C	OHSU	5
GSM726097	Control - #881 - hippocampus CA1 - Male - 90yr	RNA	Control - #881 - hippocampus CA1 - Male - 90yr	The data were normalised using quantile normalisation with normalize.quantiles() in R	GPL6947	1	hippocampus - CA1	Homo sapiens	CA1	3,3	5298416027	Male	23	881	90	NA	0	D	OHSU	2
GSM726098	AD - #1294 - hippocampus CA3 - Female - 90yr	RNA	AD - #1294 - hippocampus CA3 - Female - 90yr	The data were normalised using quantile normalisation with normalize.quantiles() in R	GPL6947	1	hippocampus - CA3	Homo sapiens	CA3	3,3	5298416027	Female	19	1294	90	10	2	E	OHSU	6
GSM726099	Control - #1731 - hippocampus CA1 - Female - 74yr	RNA	Control - #1731 - hippocampus CA1 - Female - 74yr	The data were normalised using quantile normalisation with normalize.quantiles() in R	GPL6947	1	hippocampus - CA1	Homo sapiens	CA1	NA	5298416027	Female	7.5	1731	74	NA	1	F	OHSU	2
GSM726100	Control - #1064 - hippocampus CA1 - Female - 83yr	RNA	Control - #1064 - hippocampus CA1 - Female - 83yr	The data were normalised using quantile normalisation with normalize.quantiles() in R	GPL6947	1	hippocampus - CA1	Homo sapiens	CA1	NA	5298416027	Female	8	1064	83	NA	0	G	OHSU	1
GSM726101	AD - #993 - hippocampus CA1 - Male - 83yr	RNA	AD - #993 - hippocampus CA1 - Male - 83yr	The data were normalised using quantile normalisation with normalize.quantiles() in R	GPL6947	1	hippocampus - CA1	Homo sapiens	CA1	4,4	5298416027	Male	15	993	83	11	3	H	OHSU	6
GSM726102	Control - #1720 - hippocampus CA1 - Male - 73yr	RNA	Control - #1720 - hippocampus CA1 - Male - 73yr	The data were normalised using quantile normalisation with normalize.quantiles() in R	GPL6947	1	hippocampus - CA1	Homo sapiens	CA1	3,4	5298416027	Male	5.25	1720	73	NA	1	I	OHSU	2
GSM726103	Control - #1720 - hippocampus CA3 - Male - 73yr	RNA	Control - #1720 - hippocampus CA3 - Male - 73yr	The data were normalised using quantile normalisation with normalize.quantiles() in R	GPL6947	1	hippocampus - CA3	Homo sapiens	CA3	3,4	5298416027	Male	5.25	1720	73	NA	1	K	OHSU	2
GSM726104	Control - #962 - hippocampus CA3 - Female - 70yr	RNA	Control - #962 - hippocampus CA3 - Female - 70yr	The data were normalised using quantile normalisation with normalize.quantiles() in R	GPL6947	1	hippocampus - CA3	Homo sapiens	CA3	NA	5298416027	Female	NA	962	70	NA	1	L	OHSU	1
GSM726105	Control - #588 - hippocampus CA1 - Male - 85yr	RNA	Control - #588 - hippocampus CA1 - Male - 85yr	The data were normalised using quantile normalisation with normalize.quantiles() in R	GPL6947	1	hippocampus - CA1	Homo sapiens	CA1	2,3	5298416040	Male	5	588	85	NA	1	A	OHSU	2
GSM726106	AD - #4155 - hippocampus CA3 - Female - 79yr	RNA	AD - #4155 - hippocampus CA3 - Female - 79yr	The data were normalised using quantile normalisation with normalize.quantiles() in R	GPL6947	1	hippocampus - CA3	Homo sapiens	CA3	NA	5298416040	Female	17.7	4155	79	NA	2	B	VA	5
GSM726107	AD - #1294 - hippocampus CA1 - Female - 90yr	RNA	AD - #1294 - hippocampus CA1 - Female - 90yr	The data were normalised using quantile normalisation with normalize.quantiles() in R	GPL6947	1	hippocampus - CA1	Homo sapiens	CA1	3,3	5298416040	Female	19	1294	90	10	2	C	OHSU	6
GSM726108	AD - #4159 - hippocampus CA1 - Female - 80yr	RNA	AD - #4159 - hippocampus CA1 - Female - 80yr	The data were normalised using quantile normalisation with normalize.quantiles() in R	GPL6947	1	hippocampus - CA1	Homo sapiens	CA1	NA	5298416040	Female	12.5	4159	80	NA	3	E	VA	5
GSM726109	Control - #1376 - hippocampus CA1 - Male - 85yr	RNA	Control - #1376 - hippocampus CA1 - Male - 85yr	The data were normalised using quantile normalisation with normalize.quantiles() in R	GPL6947	1	hippocampus - CA1	Homo sapiens	CA1	3,3	5298416040	Male	18	1376	85.4	NA	1	F	OHSU	2
GSM726110	Control - #862 - hippocampus CA3 - Male - 75yr	RNA	Control - #862 - hippocampus CA3 - Male - 75yr	The data were normalised using quantile normalisation with normalize.quantiles() in R	GPL6947	1	hippocampus - CA3	Homo sapiens	CA3	3,3	5298416040	Male	2	862	75	NA	0	G	OHSU	1
GSM726111	AD - #1380 - hippocampus CA1 - Female - 84yr	RNA	AD - #1380 - hippocampus CA1 - Female - 84yr	The data were normalised using quantile normalisation with normalize.quantiles() in R	GPL6947	1	hippocampus - CA1	Homo sapiens	CA1	3,3	5298416040	Female	18	1380	84.6	9	3	I	OHSU	6
GSM726112	Control - #881 - hippocampus CA3 - Male - 90yr	RNA	Control - #881 - hippocampus CA3 - Male - 90yr	The data were normalised using quantile normalisation with normalize.quantiles() in R	GPL6947	1	hippocampus - CA3	Homo sapiens	CA3	3,3	5298416040	Male	23	881	90	NA	0	J	OHSU	2
GSM726113	Control - #3795 - hippocampus CA3 - Female - 72yr	RNA	Control - #3795 - hippocampus CA3 - Female - 72yr	The data were normalised using quantile normalisation with normalize.quantiles() in R	GPL6947	1	hippocampus - CA3	Homo sapiens	CA3	NA	5298416040	Female	14	3795	72	NA	NA	K	VA	NA
GSM726114	AD - #1673 - hippocampus CA3 - Male - 81yr	RNA	AD - #1673 - hippocampus CA3 - Male - 81yr	The data were normalised using quantile normalisation with normalize.quantiles() in R	GPL6947	1	hippocampus - CA3	Homo sapiens	CA3	NA	5298416040	Male	5.5	1673	81	10	2	L	OHSU	5
GSM726115	AD - #1673 - hippocampus CA1 - Male - 81yr	RNA	AD - #1673 - hippocampus CA1 - Male - 81yr	The data were normalised using quantile normalisation with normalize.quantiles() in R	GPL6947	1	hippocampus - CA1	Homo sapiens	CA1	NA	5298416060	Male	5.5	1673	81	10	2	A	OHSU	5
GSM726116	Control - #962 - hippocampus CA1 - Female - 70yr	RNA	Control - #962 - hippocampus CA1 - Female - 70yr	The data were normalised using quantile normalisation with normalize.quantiles() in R	GPL6947	1	hippocampus - CA1	Homo sapiens	CA1	NA	5298416060	Female	NA	962	70	NA	1	B	OHSU	1
GSM726117	Control - #1013 - hippocampus CA1 - Male - 90yr	RNA	Control - #1013 - hippocampus CA1 - Male - 90yr	The data were normalised using quantile normalisation with normalize.quantiles() in R	GPL6947	1	hippocampus - CA1	Homo sapiens	CA1	2,3	5298416060	Male	6	1013	90	NA	0	C	OHSU	1
GSM726118	AD - #1167 - hippocampus CA1 - Male - 68yr	RNA	AD - #1167 - hippocampus CA1 - Male - 68yr	The data were normalised using quantile normalisation with normalize.quantiles() in R	GPL6947	1	hippocampus - CA1	Homo sapiens	CA1	NA	5298416060	Male	9.5	1167	68	8	3	D	OHSU	5
GSM726119	AD - #704 - hippocampus CA3 - Male - 81yr	RNA	AD - #704 - hippocampus CA3 - Male - 81yr	The data were normalised using quantile normalisation with normalize.quantiles() in R	GPL6947	1	hippocampus - CA3	Homo sapiens	CA3	3,4	5298416060	Male	12	704	81	11	3	E	OHSU	5
GSM726120	AD - #4155 - hippocampus CA1 - Female - 79yr	RNA	AD - #4155 - hippocampus CA1 - Female - 79yr	The data were normalised using quantile normalisation with normalize.quantiles() in R	GPL6947	1	hippocampus - CA1	Homo sapiens	CA1	NA	5298416060	Female	17.7	4155	79	NA	2	F	VA	5
GSM726121	Control - #3777 - hippocampus CA1 - Male - 84yr	RNA	Control - #3777 - hippocampus CA1 - Male - 84yr	The data were normalised using quantile normalisation with normalize.quantiles() in R	GPL6947	1	hippocampus - CA1	Homo sapiens	CA1	NA	5298416060	Male	13.5	3777	84	NA	NA	G	VA	NA
GSM726122	AD - #827 - hippocampus CA3 - Male - 90yr	RNA	AD - #827 - hippocampus CA3 - Male - 90yr	The data were normalised using quantile normalisation with normalize.quantiles() in R	GPL6947	1	hippocampus - CA3	Homo sapiens	CA3	NA	5298416060	Male	3.5	827	90	NA	3	I	OHSU	5
GSM726123	AD - #1388 - hippocampus CA3 - Male - 67yr	RNA	AD - #1388 - hippocampus CA3 - Male - 67yr	The data were normalised using quantile normalisation with normalize.quantiles() in R	GPL6947	1	hippocampus - CA3	Homo sapiens	CA3	3,3	5298416060	Male	3.5	1388	67.2	8	3	J	OHSU	6
GSM726124	Control - #862 - hippocampus CA1 - Male - 75yr	RNA	Control - #862 - hippocampus CA1 - Male - 75yr	The data were normalised using quantile normalisation with normalize.quantiles() in R	GPL6947	1	hippocampus - CA1	Homo sapiens	CA1	3,3	5298416058	Male	2	862	75	NA	0	A	OHSU	1
GSM726125	Control - #1376 - hippocampus CA3 - Male - 85yr	RNA	Control - #1376 - hippocampus CA3 - Male - 85yr	The data were normalised using quantile normalisation with normalize.quantiles() in R	GPL6947	1	hippocampus - CA3	Homo sapiens	CA3	3,3	5298416058	Male	18	1376	85.4	NA	1	B	OHSU	2
GSM726126	AD - #926 - hippocampus CA3 - Female - 79yr	RNA	AD - #926 - hippocampus CA3 - Female - 79yr	The data were normalised using quantile normalisation with normalize.quantiles() in R	GPL6947	1	hippocampus - CA3	Homo sapiens	CA3	NA	5298416058	Female	4	926	79	15	3	C	OHSU	6
GSM726127	AD - #926 - hippocampus CA1 - Female - 79yr	RNA	AD - #926 - hippocampus CA1 - Female - 79yr	The data were normalised using quantile normalisation with normalize.quantiles() in R	GPL6947	1	hippocampus - CA1	Homo sapiens	CA1	NA	5298416058	Female	4	926	79	15	3	D	OHSU	6
GSM726128	AD - #827 - hippocampus CA1 - Male - 90yr	RNA	AD - #827 - hippocampus CA1 - Male - 90yr	The data were normalised using quantile normalisation with normalize.quantiles() in R	GPL6947	1	hippocampus - CA1	Homo sapiens	CA1	NA	5298416058	Male	3.5	827	90	NA	3	E	OHSU	5
GSM726129	AD - #4152 - hippocampus CA1 - Female - 74yr	RNA	AD - #4152 - hippocampus CA1 - Female - 74yr	The data were normalised using quantile normalisation with normalize.quantiles() in R	GPL6947	1	hippocampus - CA1	Homo sapiens	CA1	NA	5298416058	Female	7	4152	74	NA	2	F	VA	4
GSM726130	Control - #3912 - hippocampus CA1 - Male - 80yr	RNA	Control - #3912 - hippocampus CA1 - Male - 80yr	The data were normalised using quantile normalisation with normalize.quantiles() in R	GPL6947	1	hippocampus - CA1	Homo sapiens	CA1	NA	5298416058	Male	10.5	3912	80	NA	NA	G	VA	NA
GSM726131	Control - #1761 - hippocampus CA3 - Male - 86yr	RNA	Control - #1761 - hippocampus CA3 - Male - 86yr	The data were normalised using quantile normalisation with normalize.quantiles() in R	GPL6947	1	hippocampus - CA3	Homo sapiens	CA3	NA	5298416058	Male	24	1761	86	NA	1	H	OHSU	1
GSM726132	Control - #588 - hippocampus CA3 - Male - 85yr	RNA	Control - #588 - hippocampus CA3 - Male - 85yr	The data were normalised using quantile normalisation with normalize.quantiles() in R	GPL6947	1	hippocampus - CA3	Homo sapiens	CA3	2,3	5298416058	Male	5	588	85	NA	1	I	OHSU	2
GSM726133	Control - #3777 - hippocampus CA3 - Male - 84yr	RNA	Control - #3777 - hippocampus CA3 - Male - 84yr	The data were normalised using quantile normalisation with normalize.quantiles() in R	GPL6947	1	hippocampus - CA3	Homo sapiens	CA3	NA	5298416058	Male	13.5	3777	84	NA	NA	J	VA	NA
GSM726134	Control - #1385 - hippocampus CA1 - Male - 81yr	RNA	Control - #1385 - hippocampus CA1 - Male - 81yr	The data were normalised using quantile normalisation with normalize.quantiles() in R	GPL6947	1	hippocampus - CA1	Homo sapiens	CA1	3,3	5298416058	Male	6	1385	81	NA	1	K	OHSU	2
GSM726135	AD - #1380 - hippocampus CA3 - Female - 84yr	RNA	AD - #1380 - hippocampus CA3 - Female - 84yr	The data were normalised using quantile normalisation with normalize.quantiles() in R	GPL6947	1	hippocampus - CA3	Homo sapiens	CA3	3,3	5298416058	Female	18	1380	84.6	9	3	L	OHSU	6
GSM726136	Control - #3740 - hippocampus CA3 - Female - 88yr	RNA	Control - #3740 - hippocampus CA3 - Female - 88yr	The data were normalised using quantile normalisation with normalize.quantiles() in R	GPL6947	1	hippocampus - CA3	Homo sapiens	CA3	NA	5298416003	Female	14	3740	88	NA	NA	A	VA	NA
GSM726137	Control - #3912 - hippocampus CA3 - Male - 80yr	RNA	Control - #3912 - hippocampus CA3 - Male - 80yr	The data were normalised using quantile normalisation with normalize.quantiles() in R	GPL6947	1	hippocampus - CA3	Homo sapiens	CA3	NA	5298416003	Male	10.5	3912	80	NA	NA	B	VA	NA
GSM726138	AD - #1440 - hippocampus CA1 - Male - 72yr	RNA	AD - #1440 - hippocampus CA1 - Male - 72yr	The data were normalised using quantile normalisation with normalize.quantiles() in R	GPL6947	1	hippocampus - CA1	Homo sapiens	CA1	3,4	5298416003	Male	7.5	1440	72.6	8	2	C	OHSU	5
GSM726139	Control - #1716 - hippocampus CA1 - Male - 90yr	RNA	Control - #1716 - hippocampus CA1 - Male - 90yr	The data were normalised using quantile normalisation with normalize.quantiles() in R	GPL6947	1	hippocampus - CA1	Homo sapiens	CA1	NA	5298416003	Male	4.5	1716	90	NA	0	E	OHSU	1
GSM726140	Control - #1064 - hippocampus CA3 - Female - 83yr	RNA	Control - #1064 - hippocampus CA3 - Female - 83yr	The data were normalised using quantile normalisation with normalize.quantiles() in R	GPL6947	1	hippocampus - CA3	Homo sapiens	CA3	NA	5298416003	Female	8	1064	83	NA	0	F	OHSU	1
GSM726141	AD - #4152 - hippocampus CA3 - Female - 74yr	RNA	AD - #4152 - hippocampus CA3 - Female - 74yr	The data were normalised using quantile normalisation with normalize.quantiles() in R	GPL6947	1	hippocampus - CA3	Homo sapiens	CA3	NA	5298416003	Female	7	4152	74	NA	2	G	VA	4
GSM726142	AD - #4098 - hippocampus CA3 - Female - 68yr	RNA	AD - #4098 - hippocampus CA3 - Female - 68yr	The data were normalised using quantile normalisation with normalize.quantiles() in R	GPL6947	1	hippocampus - CA3	Homo sapiens	CA3	NA	5298416003	Female	22.8	4098	68	NA	2	H	VA	5
GSM726143	AD - #4125 - hippocampus CA3 - Female - 61yr	RNA	AD - #4125 - hippocampus CA3 - Female - 61yr	The data were normalised using quantile normalisation with normalize.quantiles() in R	GPL6947	1	hippocampus - CA3	Homo sapiens	CA3	NA	5298416003	Female	17.3	4125	61	NA	3	I	VA	NA
GSM726144	Control - #1731 - hippocampus CA3 - Female - 74yr	RNA	Control - #1731 - hippocampus CA3 - Female - 74yr	The data were normalised using quantile normalisation with normalize.quantiles() in R	GPL6947	1	hippocampus - CA3	Homo sapiens	CA3	NA	5298416003	Female	7.5	1731	74	NA	1	K	OHSU	2
GSM726145	AD - #4098 - hippocampus CA1 - Female - 68yr	RNA	AD - #4098 - hippocampus CA1 - Female - 68yr	The data were normalised using quantile normalisation with normalize.quantiles() in R	GPL6947	1	hippocampus - CA1	Homo sapiens	CA1	NA	5298416003	Female	22.8	4098	68	NA	2	L	VA	5

## Sheet: GSE48350
Accession	Title	SampleType	Description	DataProcessing	PlatformRef	ChannelCount	Source	Organism	age (yrs)	brain region	braak stage	individual	gender	mmse	apoe genotype
GSM300166	PostcentralGyrus_female_91yrs_indiv10	RNA	Brain from cognitively intact individual.	GC-RMA expression values were obtained from CEL files using GeneSpring 7.3.1 software. PLIER expression values were obtained using Expression Console software using default settings. PLIER and GC-RMA data were processed using GeneSpring 7.0 software, with default normalizations (Data transformation:set values<0.01 to 0.01; per chip: normalize to 50th percentile; per gene: normalize to median).	GPL570	1	brain, postcentral gyrus, female, 91 years	Homo sapiens	91	postcentral gyrus		10, C	female
GSM300167	SuperiorFrontalGyrus_female_91yrs_indiv10	RNA	Brain from cognitively intact individual.	GC-RMA expression values were obtained from CEL files using GeneSpring 7.3.1 software. PLIER expression values were obtained using Expression Console software using default settings. PLIER and GC-RMA data were processed using GeneSpring 7.0 software, with default normalizations (Data transformation:set values<0.01 to 0.01; per chip: normalize to 50th percentile; per gene: normalize to median).	GPL570	1	brain, superior frontal gyrus, female, 91 years	Homo sapiens	91	superior frontal gyrus		10, C	female
GSM300168	Hippocampus_female_96yrs_indiv105	RNA	Brain from cognitively intact individual.	GC-RMA expression values were obtained from CEL files using GeneSpring 7.3.1 software. PLIER expression values were obtained using Expression Console software using default settings. PLIER and GC-RMA data were processed using GeneSpring 7.0 software, with default normalizations (Data transformation:set values<0.01 to 0.01; per chip: normalize to 50th percentile; per gene: normalize to median).	GPL570	1	brain, hippocampus, female, 96 years	Homo sapiens	96	hippocampus		105, C	female
GSM300169	Hippocampus_male_82yrs_indiv106	RNA	Brain from cognitively intact individual.	GC-RMA expression values were obtained from CEL files using GeneSpring 7.3.1 software. PLIER expression values were obtained using Expression Console software using default settings. PLIER and GC-RMA data were processed using GeneSpring 7.0 software, with default normalizations (Data transformation:set values<0.01 to 0.01; per chip: normalize to 50th percentile; per gene: normalize to median).	GPL570	1	brain, hippocampus, male, 82 years	Homo sapiens	82	hippocampus		106, C	male
GSM300170	Hippocampus_male_84yrs_indiv108	RNA	Brain from cognitively intact individual.	GC-RMA expression values were obtained from CEL files using GeneSpring 7.3.1 software. PLIER expression values were obtained using Expression Console software using default settings. PLIER and GC-RMA data were processed using GeneSpring 7.0 software, with default normalizations (Data transformation:set values<0.01 to 0.01; per chip: normalize to 50th percentile; per gene: normalize to median).	GPL570	1	brain, hippocampus, male, 84 years	Homo sapiens	84	hippocampus		108, C	male
GSM300171	Hippocampus_female_87yrs_indiv109	RNA	Brain from cognitively intact individual.	GC-RMA expression values were obtained from CEL files using GeneSpring 7.3.1 software. PLIER expression values were obtained using Expression Console software using default settings. PLIER and GC-RMA data were processed using GeneSpring 7.0 software, with default normalizations (Data transformation:set values<0.01 to 0.01; per chip: normalize to 50th percentile; per gene: normalize to median).	GPL570	1	brain, hippocampus, female, 87 years	Homo sapiens	87	hippocampus		109, C	female
GSM300172	Hippocampus_female_82yrs_indiv111	RNA	Brain from cognitively intact individual.	GC-RMA expression values were obtained from CEL files using GeneSpring 7.3.1 software. PLIER expression values were obtained using Expression Console software using default settings. PLIER and GC-RMA data were processed using GeneSpring 7.0 software, with default normalizations (Data transformation:set values<0.01 to 0.01; per chip: normalize to 50th percentile; per gene: normalize to median).	GPL570	1	brain, hippocampus, female, 82 years	Homo sapiens	82	hippocampus		111, C	female
GSM300173	EntorhinalCortex_male_45yrs_indiv12	RNA	Brain from cognitively intact individual.	GC-RMA expression values were obtained from CEL files using GeneSpring 7.3.1 software. PLIER expression values were obtained using Expression Console software using default settings. PLIER and GC-RMA data were processed using GeneSpring 7.0 software, with default normalizations (Data transformation:set values<0.01 to 0.01; per chip: normalize to 50th percentile; per gene: normalize to median).	GPL570	1	brain, entorhinal cortex, male, 45 years	Homo sapiens	45	entorhinal cortex		12, AA	male
GSM300174	Hippocampus_male_45yrs_indiv12	RNA	Brain from cognitively intact individual.	GC-RMA expression values were obtained from CEL files using GeneSpring 7.3.1 software. PLIER expression values were obtained using Expression Console software using default settings. PLIER and GC-RMA data were processed using GeneSpring 7.0 software, with default normalizations (Data transformation:set values<0.01 to 0.01; per chip: normalize to 50th percentile; per gene: normalize to median).	GPL570	1	brain, hippocampus, male, 45 years	Homo sapiens	45	hippocampus		12, AA	male
GSM300175	PostcentralGyrus_male_45yrs_indiv12	RNA	Brain from cognitively intact individual.	GC-RMA expression values were obtained from CEL files using GeneSpring 7.3.1 software. PLIER expression values were obtained using Expression Console software using default settings. PLIER and GC-RMA data were processed using GeneSpring 7.0 software, with default normalizations (Data transformation:set values<0.01 to 0.01; per chip: normalize to 50th percentile; per gene: normalize to median).	GPL570	1	brain, postcentral gyrus, male, 45 years	Homo sapiens	45	postcentral gyrus		12, AA	male
GSM300176	SuperiorFrontalGyrus_male_45yrs_indiv12	RNA	Brain from cognitively intact individual.	GC-RMA expression values were obtained from CEL files using GeneSpring 7.3.1 software. PLIER expression values were obtained using Expression Console software using default settings. PLIER and GC-RMA data were processed using GeneSpring 7.0 software, with default normalizations (Data transformation:set values<0.01 to 0.01; per chip: normalize to 50th percentile; per gene: normalize to median).	GPL570	1	brain, superior frontal gyrus, male, 45 years	Homo sapiens	45	superior frontal gyrus		12, AA	male
GSM300177	EntorhinalCortex_male_95yrs_indiv14	RNA	Brain from cognitively intact individual.	GC-RMA expression values were obtained from CEL files using GeneSpring 7.3.1 software. PLIER expression values were obtained using Expression Console software using default settings. PLIER and GC-RMA data were processed using GeneSpring 7.0 software, with default normalizations (Data transformation:set values<0.01 to 0.01; per chip: normalize to 50th percentile; per gene: normalize to median).	GPL570	1	brain, entorhinal cortex, male, 95 years	Homo sapiens	95	entorhinal cortex		14, C	male
GSM300178	Hippocampus_male_95yrs_indiv14	RNA	Brain from cognitively intact individual.	GC-RMA expression values were obtained from CEL files using GeneSpring 7.3.1 software. PLIER expression values were obtained using Expression Console software using default settings. PLIER and GC-RMA data were processed using GeneSpring 7.0 software, with default normalizations (Data transformation:set values<0.01 to 0.01; per chip: normalize to 50th percentile; per gene: normalize to median).	GPL570	1	brain, hippocampus, male, 95 years	Homo sapiens	95	hippocampus		14, C	male
GSM300179	PostcentralGyrus_male_95yrs_indiv14	RNA	Brain from cognitively intact individual.	GC-RMA expression values were obtained from CEL files using GeneSpring 7.3.1 software. PLIER expression values were obtained using Expression Console software using default settings. PLIER and GC-RMA data were processed using GeneSpring 7.0 software, with default normalizations (Data transformation:set values<0.01 to 0.01; per chip: normalize to 50th percentile; per gene: normalize to median).	GPL570	1	brain, postcentral gyrus, male, 95 years	Homo sapiens	95	postcentral gyrus		14, C	male
GSM300180	SuperiorFrontalGyrus_male_95yrs_indiv14	RNA	Brain from cognitively intact individual.	GC-RMA expression values were obtained from CEL files using GeneSpring 7.3.1 software. PLIER expression values were obtained using Expression Console software using default settings. PLIER and GC-RMA data were processed using GeneSpring 7.0 software, with default normalizations (Data transformation:set values<0.01 to 0.01; per chip: normalize to 50th percentile; per gene: normalize to median).	GPL570	1	brain, superior frontal gyrus, male, 95 years	Homo sapiens	95	superior frontal gyrus		14, C	male
GSM300181	EntorhinalCortex_male_80yrs_indiv15	RNA	Brain from cognitively intact individual.	GC-RMA expression values were obtained from CEL files using GeneSpring 7.3.1 software. PLIER expression values were obtained using Expression Console software using default settings. PLIER and GC-RMA data were processed using GeneSpring 7.0 software, with default normalizations (Data transformation:set values<0.01 to 0.01; per chip: normalize to 50th percentile; per gene: normalize to median).	GPL570	1	brain, entorhinal cortex, male, 80 years	Homo sapiens	80	entorhinal cortex		15, C	male
GSM300182	Hippocampus_male_80yrs_indiv15	RNA	Brain from cognitively intact individual.	GC-RMA expression values were obtained from CEL files using GeneSpring 7.3.1 software. PLIER expression values were obtained using Expression Console software using default settings. PLIER and GC-RMA data were processed using GeneSpring 7.0 software, with default normalizations (Data transformation:set values<0.01 to 0.01; per chip: normalize to 50th percentile; per gene: normalize to median).	GPL570	1	brain, hippocampus, male, 80 years	Homo sapiens	80	hippocampus		15, C	male
GSM300183	PostcentralGyrus_male_80yrs_indiv15	RNA	Brain from cognitively intact individual.	GC-RMA expression values were obtained from CEL files using GeneSpring 7.3.1 software. PLIER expression values were obtained using Expression Console software using default settings. PLIER and GC-RMA data were processed using GeneSpring 7.0 software, with default normalizations (Data transformation:set values<0.01 to 0.01; per chip: normalize to 50th percentile; per gene: normalize to median).	GPL570	1	brain, postcentral gyrus, male, 80 years	Homo sapiens	80	postcentral gyrus		15, C	male
GSM300185	Hippocampus_male_91yrs_indiv16-07	RNA	Brain from cognitively intact individual.	GC-RMA expression values were obtained from CEL files using GeneSpring 7.3.1 software. PLIER expression values were obtained using Expression Console software using default settings. PLIER and GC-RMA data were processed using GeneSpring 7.0 software, with default normalizations (Data transformation:set values<0.01 to 0.01; per chip: normalize to 50th percentile; per gene: normalize to median).	GPL570	1	brain, hippocampus, male, 91 years	Homo sapiens	91	hippocampus		16-07, C	male
GSM300186	EntorhinalCortex_female_45yrs_indiv17	RNA	Brain from cognitively intact individual.	GC-RMA expression values were obtained from CEL files using GeneSpring 7.3.1 software. PLIER expression values were obtained using Expression Console software using default settings. PLIER and GC-RMA data were processed using GeneSpring 7.0 software, with default normalizations (Data transformation:set values<0.01 to 0.01; per chip: normalize to 50th percentile; per gene: normalize to median).	GPL570	1	brain, entorhinal cortex, female, 45 years	Homo sapiens	45	entorhinal cortex		17, C	female
GSM300187	Hippocampus_female_45yrs_indiv17	RNA	Brain from cognitively intact individual.	GC-RMA expression values were obtained from CEL files using GeneSpring 7.3.1 software. PLIER expression values were obtained using Expression Console software using default settings. PLIER and GC-RMA data were processed using GeneSpring 7.0 software, with default normalizations (Data transformation:set values<0.01 to 0.01; per chip: normalize to 50th percentile; per gene: normalize to median).	GPL570	1	brain, hippocampus, female, 45 years	Homo sapiens	45	hippocampus		17, C	female
GSM300188	SuperiorFrontalGyrus_female_45yrs_indiv17	RNA	Brain from cognitively intact individual.	GC-RMA expression values were obtained from CEL files using GeneSpring 7.3.1 software. PLIER expression values were obtained using Expression Console software using default settings. PLIER and GC-RMA data were processed using GeneSpring 7.0 software, with default normalizations (Data transformation:set values<0.01 to 0.01; per chip: normalize to 50th percentile; per gene: normalize to median).	GPL570	1	brain, superior frontal gyrus, female, 45 years	Homo sapiens	45	superior frontal gyrus		17, C	female
GSM300189	EntorhinalCortex_female_74yrs_indiv18	RNA	Brain from cognitively intact individual.	GC-RMA expression values were obtained from CEL files using GeneSpring 7.3.1 software. PLIER expression values were obtained using Expression Console software using default settings. PLIER and GC-RMA data were processed using GeneSpring 7.0 software, with default normalizations (Data transformation:set values<0.01 to 0.01; per chip: normalize to 50th percentile; per gene: normalize to median).	GPL570	1	brain, entorhinal cortex, female, 74 years	Homo sapiens	74	entorhinal cortex		18, C	female
GSM300190	Hippocampus_female_74yrs_indiv18	RNA	Brain from cognitively intact individual.	GC-RMA expression values were obtained from CEL files using GeneSpring 7.3.1 software. PLIER expression values were obtained using Expression Console software using default settings. PLIER and GC-RMA data were processed using GeneSpring 7.0 software, with default normalizations (Data transformation:set values<0.01 to 0.01; per chip: normalize to 50th percentile; per gene: normalize to median).	GPL570	1	brain, hippocampus, female, 74 years	Homo sapiens	74	hippocampus		18, C	female
GSM300191	SuperiorFrontalGyrus_female_74yrs_indiv18	RNA	Brain from cognitively intact individual.	GC-RMA expression values were obtained from CEL files using GeneSpring 7.3.1 software. PLIER expression values were obtained using Expression Console software using default settings. PLIER and GC-RMA data were processed using GeneSpring 7.0 software, with default normalizations (Data transformation:set values<0.01 to 0.01; per chip: normalize to 50th percentile; per gene: normalize to median).	GPL570	1	brain, superior frontal gyrus, female, 74 years	Homo sapiens	74	superior frontal gyrus		18, C	female
GSM300192	EntorhinalCortex_female_99yrs_indiv2	RNA	Brain from cognitively intact individual.	GC-RMA expression values were obtained from CEL files using GeneSpring 7.3.1 software. PLIER expression values were obtained using Expression Console software using default settings. PLIER and GC-RMA data were processed using GeneSpring 7.0 software, with default normalizations (Data transformation:set values<0.01 to 0.01; per chip: normalize to 50th percentile; per gene: normalize to median).	GPL570	1	brain, entorhinal cortex, female, 99 years	Homo sapiens	99	entorhinal cortex		2, C	female
GSM300193	Hippocampus_female_99yrs_indiv2	RNA	Brain from cognitively intact individual.	GC-RMA expression values were obtained from CEL files using GeneSpring 7.3.1 software. PLIER expression values were obtained using Expression Console software using default settings. PLIER and GC-RMA data were processed using GeneSpring 7.0 software, with default normalizations (Data transformation:set values<0.01 to 0.01; per chip: normalize to 50th percentile; per gene: normalize to median).	GPL570	1	brain, hippocampus, female, 99 years	Homo sapiens	99	hippocampus		2, C	female
GSM300194	PostcentralGyrus_female_99yrs_indiv2	RNA	Brain from cognitively intact individual.	GC-RMA expression values were obtained from CEL files using GeneSpring 7.3.1 software. PLIER expression values were obtained using Expression Console software using default settings. PLIER and GC-RMA data were processed using GeneSpring 7.0 software, with default normalizations (Data transformation:set values<0.01 to 0.01; per chip: normalize to 50th percentile; per gene: normalize to median).	GPL570	1	brain, postcentral gyrus, female, 99 years	Homo sapiens	99	postcentral gyrus		2, C	female
GSM300195	SuperiorFrontalGyrus_female_99yrs_indiv2	RNA	Brain from cognitively intact individual.	GC-RMA expression values were obtained from CEL files using GeneSpring 7.3.1 software. PLIER expression values were obtained using Expression Console software using default settings. PLIER and GC-RMA data were processed using GeneSpring 7.0 software, with default normalizations (Data transformation:set values<0.01 to 0.01; per chip: normalize to 50th percentile; per gene: normalize to median).	GPL570	1	brain, superior frontal gyrus, female, 99 years	Homo sapiens	99	superior frontal gyrus		2, C	female
GSM300196	EntorhinalCortex_female_74yrs_indiv21	RNA	Brain from cognitively intact individual.	GC-RMA expression values were obtained from CEL files using GeneSpring 7.3.1 software. PLIER expression values were obtained using Expression Console software using default settings. PLIER and GC-RMA data were processed using GeneSpring 7.0 software, with default normalizations (Data transformation:set values<0.01 to 0.01; per chip: normalize to 50th percentile; per gene: normalize to median).	GPL570	1	brain, entorhinal cortex, female, 74 years	Homo sapiens	74	entorhinal cortex		21, C	female
GSM300197	Hippocampus_female_74yrs_indiv21	RNA	Brain from cognitively intact individual.	GC-RMA expression values were obtained from CEL files using GeneSpring 7.3.1 software. PLIER expression values were obtained using Expression Console software using default settings. PLIER and GC-RMA data were processed using GeneSpring 7.0 software, with default normalizations (Data transformation:set values<0.01 to 0.01; per chip: normalize to 50th percentile; per gene: normalize to median).	GPL570	1	brain, hippocampus, female, 74 years	Homo sapiens	74	hippocampus		21, C	female
GSM300198	PostcentralGyrus_female_74yrs_indiv21	RNA	Brain from cognitively intact individual.	GC-RMA expression values were obtained from CEL files using GeneSpring 7.3.1 software. PLIER expression values were obtained using Expression Console software using default settings. PLIER and GC-RMA data were processed using GeneSpring 7.0 software, with default normalizations (Data transformation:set values<0.01 to 0.01; per chip: normalize to 50th percentile; per gene: normalize to median).	GPL570	1	brain, postcentral gyrus, female, 74 years	Homo sapiens	74	postcentral gyrus		21, C	female
GSM300199	SuperiorFrontalGyrus_female_74yrs_indiv21	RNA	Brain from cognitively intact individual.	GC-RMA expression values were obtained from CEL files using GeneSpring 7.3.1 software. PLIER expression values were obtained using Expression Console software using default settings. PLIER and GC-RMA data were processed using GeneSpring 7.0 software, with default normalizations (Data transformation:set values<0.01 to 0.01; per chip: normalize to 50th percentile; per gene: normalize to median).	GPL570	1	brain, superior frontal gyrus, female, 74 years	Homo sapiens	74	superior frontal gyrus		21, C	female
GSM300200	PostcentralGyrus_female_92yrs_indiv26	RNA	Brain from cognitively intact individual.	GC-RMA expression values were obtained from CEL files using GeneSpring 7.3.1 software. PLIER expression values were obtained using Expression Console software using default settings. PLIER and GC-RMA data were processed using GeneSpring 7.0 software, with default normalizations (Data transformation:set values<0.01 to 0.01; per chip: normalize to 50th percentile; per gene: normalize to median).	GPL570	1	brain, postcentral gyrus, female, 92 years	Homo sapiens	92	postcentral gyrus		26, C	female
GSM300201	SuperiorFrontalGyrus_female_92yrs_indiv26	RNA	Brain from cognitively intact individual.	GC-RMA expression values were obtained from CEL files using GeneSpring 7.3.1 software. PLIER expression values were obtained using Expression Console software using default settings. PLIER and GC-RMA data were processed using GeneSpring 7.0 software, with default normalizations (Data transformation:set values<0.01 to 0.01; per chip: normalize to 50th percentile; per gene: normalize to median).	GPL570	1	brain, superior frontal gyrus, female, 92 years	Homo sapiens	92	superior frontal gyrus		26, C	female
GSM300202	PostcentralGyrus_female_91yrs_indiv27	RNA	Brain from cognitively intact individual.	GC-RMA expression values were obtained from CEL files using GeneSpring 7.3.1 software. PLIER expression values were obtained using Expression Console software using default settings. PLIER and GC-RMA data were processed using GeneSpring 7.0 software, with default normalizations (Data transformation:set values<0.01 to 0.01; per chip: normalize to 50th percentile; per gene: normalize to median).	GPL570	1	brain, postcentral gyrus, female, 91 years	Homo sapiens	91	postcentral gyrus		27, C	female
GSM300203	SuperiorFrontalGyrus_female_91yrs_indiv27	RNA	Brain from cognitively intact individual.	GC-RMA expression values were obtained from CEL files using GeneSpring 7.3.1 software. PLIER expression values were obtained using Expression Console software using default settings. PLIER and GC-RMA data were processed using GeneSpring 7.0 software, with default normalizations (Data transformation:set values<0.01 to 0.01; per chip: normalize to 50th percentile; per gene: normalize to median).	GPL570	1	brain, superior frontal gyrus, female, 91 years	Homo sapiens	91	superior frontal gyrus		27, C	female
GSM300204	EntorhinalCortex_male_83yrs_indiv28	RNA	Brain from cognitively intact individual.	GC-RMA expression values were obtained from CEL files using GeneSpring 7.3.1 software. PLIER expression values were obtained using Expression Console software using default settings. PLIER and GC-RMA data were processed using GeneSpring 7.0 software, with default normalizations (Data transformation:set values<0.01 to 0.01; per chip: normalize to 50th percentile; per gene: normalize to median).	GPL570	1	brain, entorhinal cortex, male, 83 years	Homo sapiens	83	entorhinal cortex		28, C	male
GSM300205	Hippocampus_male_83yrs_indiv28	RNA	Brain from cognitively intact individual.	GC-RMA expression values were obtained from CEL files using GeneSpring 7.3.1 software. PLIER expression values were obtained using Expression Console software using default settings. PLIER and GC-RMA data were processed using GeneSpring 7.0 software, with default normalizations (Data transformation:set values<0.01 to 0.01; per chip: normalize to 50th percentile; per gene: normalize to median).	GPL570	1	brain, hippocampus, male, 83 years	Homo sapiens	83	hippocampus		28, C	male
GSM300206	PostcentralGyrus_male_83yrs_indiv28	RNA	Brain from cognitively intact individual.	GC-RMA expression values were obtained from CEL files using GeneSpring 7.3.1 software. PLIER expression values were obtained using Expression Console software using default settings. PLIER and GC-RMA data were processed using GeneSpring 7.0 software, with default normalizations (Data transformation:set values<0.01 to 0.01; per chip: normalize to 50th percentile; per gene: normalize to median).	GPL570	1	brain, postcentral gyrus, male, 83 years	Homo sapiens	83	postcentral gyrus		28, C	male
GSM300207	SuperiorFrontalGyrus_male_83yrs_indiv28	RNA	Brain from cognitively intact individual.	GC-RMA expression values were obtained from CEL files using GeneSpring 7.3.1 software. PLIER expression values were obtained using Expression Console software using default settings. PLIER and GC-RMA data were processed using GeneSpring 7.0 software, with default normalizations (Data transformation:set values<0.01 to 0.01; per chip: normalize to 50th percentile; per gene: normalize to median).	GPL570	1	brain, superior frontal gyrus, male, 83 years	Homo sapiens	83	superior frontal gyrus		28, C	male
GSM300208	EntorhinalCortex_male_28yrs_indiv29	RNA	Brain from cognitively intact individual.	GC-RMA expression values were obtained from CEL files using GeneSpring 7.3.1 software. PLIER expression values were obtained using Expression Console software using default settings. PLIER and GC-RMA data were processed using GeneSpring 7.0 software, with default normalizations (Data transformation:set values<0.01 to 0.01; per chip: normalize to 50th percentile; per gene: normalize to median).	GPL570	1	brain, entorhinal cortex, male, 28 years	Homo sapiens	28	entorhinal cortex		29, C	male
GSM300209	Hippocampus_male_28yrs_indiv29	RNA	Brain from cognitively intact individual.	GC-RMA expression values were obtained from CEL files using GeneSpring 7.3.1 software. PLIER expression values were obtained using Expression Console software using default settings. PLIER and GC-RMA data were processed using GeneSpring 7.0 software, with default normalizations (Data transformation:set values<0.01 to 0.01; per chip: normalize to 50th percentile; per gene: normalize to median).	GPL570	1	brain, hippocampus, male, 28 years	Homo sapiens	28	hippocampus		29, C	male
GSM300210	PostcentralGyrus_male_28yrs_indiv29	RNA	Brain from cognitively intact individual.	GC-RMA expression values were obtained from CEL files using GeneSpring 7.3.1 software. PLIER expression values were obtained using Expression Console software using default settings. PLIER and GC-RMA data were processed using GeneSpring 7.0 software, with default normalizations (Data transformation:set values<0.01 to 0.01; per chip: normalize to 50th percentile; per gene: normalize to median).	GPL570	1	brain, postcentral gyrus, male, 28 years	Homo sapiens	28	postcentral gyrus		29, C	male
GSM300211	SuperiorFrontalGyrus_male_28yrs_indiv29	RNA	Brain from cognitively intact individual.	GC-RMA expression values were obtained from CEL files using GeneSpring 7.3.1 software. PLIER expression values were obtained using Expression Console software using default settings. PLIER and GC-RMA data were processed using GeneSpring 7.0 software, with default normalizations (Data transformation:set values<0.01 to 0.01; per chip: normalize to 50th percentile; per gene: normalize to median).	GPL570	1	brain, superior frontal gyrus, male, 28 years	Homo sapiens	28	superior frontal gyrus		29, C	male
GSM300212	PostcentralGyrus_female_74yrs_indiv30	RNA	Brain from cognitively intact individual.	GC-RMA expression values were obtained from CEL files using GeneSpring 7.3.1 software. PLIER expression values were obtained using Expression Console software using default settings. PLIER and GC-RMA data were processed using GeneSpring 7.0 software, with default normalizations (Data transformation:set values<0.01 to 0.01; per chip: normalize to 50th percentile; per gene: normalize to median).	GPL570	1	brain, postcentral gyrus, female, 74 years	Homo sapiens	74	postcentral gyrus		30, C	female
GSM300213	SuperiorFrontalGyrus_female_74yrs_indiv30	RNA	Brain from cognitively intact individual.	GC-RMA expression values were obtained from CEL files using GeneSpring 7.3.1 software. PLIER expression values were obtained using Expression Console software using default settings. PLIER and GC-RMA data were processed using GeneSpring 7.0 software, with default normalizations (Data transformation:set values<0.01 to 0.01; per chip: normalize to 50th percentile; per gene: normalize to median).	GPL570	1	brain, superior frontal gyrus, female, 74 years	Homo sapiens	74	superior frontal gyrus		30, C	female
GSM300214	EntorhinalCortex_male_97yrs_indiv34	RNA	Brain from cognitively intact individual.	GC-RMA expression values were obtained from CEL files using GeneSpring 7.3.1 software. PLIER expression values were obtained using Expression Console software using default settings. PLIER and GC-RMA data were processed using GeneSpring 7.0 software, with default normalizations (Data transformation:set values<0.01 to 0.01; per chip: normalize to 50th percentile; per gene: normalize to median).	GPL570	1	brain, entorhinal cortex, male, 97 years	Homo sapiens	97	entorhinal cortex		34, C	male
GSM300215	Hippocampus_male_97yrs_indiv34	RNA	Brain from cognitively intact individual.	GC-RMA expression values were obtained from CEL files using GeneSpring 7.3.1 software. PLIER expression values were obtained using Expression Console software using default settings. PLIER and GC-RMA data were processed using GeneSpring 7.0 software, with default normalizations (Data transformation:set values<0.01 to 0.01; per chip: normalize to 50th percentile; per gene: normalize to median).	GPL570	1	brain, hippocampus, male, 97 years	Homo sapiens	97	hippocampus		34, C	male
GSM300216	PostcentralGyrus_male_97yrs_indiv34	RNA	Brain from cognitively intact individual.	GC-RMA expression values were obtained from CEL files using GeneSpring 7.3.1 software. PLIER expression values were obtained using Expression Console software using default settings. PLIER and GC-RMA data were processed using GeneSpring 7.0 software, with default normalizations (Data transformation:set values<0.01 to 0.01; per chip: normalize to 50th percentile; per gene: normalize to median).	GPL570	1	brain, postcentral gyrus, male, 97 years	Homo sapiens	97	postcentral gyrus		34, C	male
GSM300217	SuperiorFrontalGyrus_male_97yrs_indiv34	RNA	Brain from cognitively intact individual.	GC-RMA expression values were obtained from CEL files using GeneSpring 7.3.1 software. PLIER expression values were obtained using Expression Console software using default settings. PLIER and GC-RMA data were processed using GeneSpring 7.0 software, with default normalizations (Data transformation:set values<0.01 to 0.01; per chip: normalize to 50th percentile; per gene: normalize to median).	GPL570	1	brain, superior frontal gyrus, male, 97 years	Homo sapiens	97	superior frontal gyrus		34, C	male
GSM300218	EntorhinalCortex_female_34yrs_indiv35	RNA	Brain from cognitively intact individual.	GC-RMA expression values were obtained from CEL files using GeneSpring 7.3.1 software. PLIER expression values were obtained using Expression Console software using default settings. PLIER and GC-RMA data were processed using GeneSpring 7.0 software, with default normalizations (Data transformation:set values<0.01 to 0.01; per chip: normalize to 50th percentile; per gene: normalize to median).	GPL570	1	brain, entorhinal cortex, female, 34 years	Homo sapiens	34	entorhinal cortex		35, AA	female
GSM300219	Hippocampus_female_34yrs_indiv35	RNA	Brain from cognitively intact individual.	GC-RMA expression values were obtained from CEL files using GeneSpring 7.3.1 software. PLIER expression values were obtained using Expression Console software using default settings. PLIER and GC-RMA data were processed using GeneSpring 7.0 software, with default normalizations (Data transformation:set values<0.01 to 0.01; per chip: normalize to 50th percentile; per gene: normalize to median).	GPL570	1	brain, hippocampus, female, 34 years	Homo sapiens	34	hippocampus		35, AA	female
GSM300220	PostcentralGyrus_female_34yrs_indiv35	RNA	Brain from cognitively intact individual.	GC-RMA expression values were obtained from CEL files using GeneSpring 7.3.1 software. PLIER expression values were obtained using Expression Console software using default settings. PLIER and GC-RMA data were processed using GeneSpring 7.0 software, with default normalizations (Data transformation:set values<0.01 to 0.01; per chip: normalize to 50th percentile; per gene: normalize to median).	GPL570	1	brain, postcentral gyrus, female, 34 years	Homo sapiens	34	postcentral gyrus		35, AA	female
GSM300221	SuperiorFrontalGyrus_female_34yrs_indiv35	RNA	Brain from cognitively intact individual.	GC-RMA expression values were obtained from CEL files using GeneSpring 7.3.1 software. PLIER expression values were obtained using Expression Console software using default settings. PLIER and GC-RMA data were processed using GeneSpring 7.0 software, with default normalizations (Data transformation:set values<0.01 to 0.01; per chip: normalize to 50th percentile; per gene: normalize to median).	GPL570	1	brain, superior frontal gyrus, female, 34 years	Homo sapiens	34	superior frontal gyrus		35, AA	female
GSM300222	EntorhinalCortex_female_74yrs_indiv38	RNA	Brain from cognitively intact individual.	GC-RMA expression values were obtained from CEL files using GeneSpring 7.3.1 software. PLIER expression values were obtained using Expression Console software using default settings. PLIER and GC-RMA data were processed using GeneSpring 7.0 software, with default normalizations (Data transformation:set values<0.01 to 0.01; per chip: normalize to 50th percentile; per gene: normalize to median).	GPL570	1	brain, entorhinal cortex, female, 74 years	Homo sapiens	74	entorhinal cortex		38, C	female
GSM300223	Hippocampus_female_74yrs_indiv38	RNA	Brain from cognitively intact individual.	GC-RMA expression values were obtained from CEL files using GeneSpring 7.3.1 software. PLIER expression values were obtained using Expression Console software using default settings. PLIER and GC-RMA data were processed using GeneSpring 7.0 software, with default normalizations (Data transformation:set values<0.01 to 0.01; per chip: normalize to 50th percentile; per gene: normalize to median).	GPL570	1	brain, hippocampus, female, 74 years	Homo sapiens	74	hippocampus		38, C	female
GSM300224	PostcentralGyrus_female_74yrs_indiv38	RNA	Brain from cognitively intact individual.	GC-RMA expression values were obtained from CEL files using GeneSpring 7.3.1 software. PLIER expression values were obtained using Expression Console software using default settings. PLIER and GC-RMA data were processed using GeneSpring 7.0 software, with default normalizations (Data transformation:set values<0.01 to 0.01; per chip: normalize to 50th percentile; per gene: normalize to median).	GPL570	1	brain, postcentral gyrus, female, 74 years	Homo sapiens	74	postcentral gyrus		38, C	female
GSM300225	SuperiorFrontalGyrus_female_74yrs_indiv38	RNA	Brain from cognitively intact individual.	GC-RMA expression values were obtained from CEL files using GeneSpring 7.3.1 software. PLIER expression values were obtained using Expression Console software using default settings. PLIER and GC-RMA data were processed using GeneSpring 7.0 software, with default normalizations (Data transformation:set values<0.01 to 0.01; per chip: normalize to 50th percentile; per gene: normalize to median).	GPL570	1	brain, superior frontal gyrus, female, 74 years	Homo sapiens	74	superior frontal gyrus		38, C	female
GSM300226	PostcentralGyrus_female_90yrs_indiv40	RNA	Brain from cognitively intact individual.	GC-RMA expression values were obtained from CEL files using GeneSpring 7.3.1 software. PLIER expression values were obtained using Expression Console software using default settings. PLIER and GC-RMA data were processed using GeneSpring 7.0 software, with default normalizations (Data transformation:set values<0.01 to 0.01; per chip: normalize to 50th percentile; per gene: normalize to median).	GPL570	1	brain, postcentral gyrus, female, 90 years	Homo sapiens	90	postcentral gyrus		40, C	female
GSM300227	Hippocampus_female_91yrs_indiv40-04	RNA	Brain from cognitively intact individual.	GC-RMA expression values were obtained from CEL files using GeneSpring 7.3.1 software. PLIER expression values were obtained using Expression Console software using default settings. PLIER and GC-RMA data were processed using GeneSpring 7.0 software, with default normalizations (Data transformation:set values<0.01 to 0.01; per chip: normalize to 50th percentile; per gene: normalize to median).	GPL570	1	brain, hippocampus, female, 91 years	Homo sapiens	91	hippocampus		40-04, C	female
GSM300228	EntorhinalCortex_female_44yrs_indiv42	RNA	Brain from cognitively intact individual.	GC-RMA expression values were obtained from CEL files using GeneSpring 7.3.1 software. PLIER expression values were obtained using Expression Console software using default settings. PLIER and GC-RMA data were processed using GeneSpring 7.0 software, with default normalizations (Data transformation:set values<0.01 to 0.01; per chip: normalize to 50th percentile; per gene: normalize to median).	GPL570	1	brain, entorhinal cortex, female, 44 years	Homo sapiens	44	entorhinal cortex		42, C	female
GSM300229	SuperiorFrontalGyrus_female_44yrs_indiv42	RNA	Brain from cognitively intact individual.	GC-RMA expression values were obtained from CEL files using GeneSpring 7.3.1 software. PLIER expression values were obtained using Expression Console software using default settings. PLIER and GC-RMA data were processed using GeneSpring 7.0 software, with default normalizations (Data transformation:set values<0.01 to 0.01; per chip: normalize to 50th percentile; per gene: normalize to median).	GPL570	1	brain, superior frontal gyrus, female, 44 years	Homo sapiens	44	superior frontal gyrus		42, C	female
GSM300230	EntorhinalCortex_female_37yrs_indiv45	RNA	Brain from cognitively intact individual.	GC-RMA expression values were obtained from CEL files using GeneSpring 7.3.1 software. PLIER expression values were obtained using Expression Console software using default settings. PLIER and GC-RMA data were processed using GeneSpring 7.0 software, with default normalizations (Data transformation:set values<0.01 to 0.01; per chip: normalize to 50th percentile; per gene: normalize to median).	GPL570	1	brain, entorhinal cortex, female, 37 years	Homo sapiens	37	entorhinal cortex		45, C	female
GSM300231	Hippocampus_female_37yrs_indiv45	RNA	Brain from cognitively intact individual.	GC-RMA expression values were obtained from CEL files using GeneSpring 7.3.1 software. PLIER expression values were obtained using Expression Console software using default settings. PLIER and GC-RMA data were processed using GeneSpring 7.0 software, with default normalizations (Data transformation:set values<0.01 to 0.01; per chip: normalize to 50th percentile; per gene: normalize to median).	GPL570	1	brain, hippocampus, female, 37 years	Homo sapiens	37	hippocampus		45, C	female
GSM300232	PostcentralGyrus_female_37yrs_indiv45	RNA	Brain from cognitively intact individual.	GC-RMA expression values were obtained from CEL files using GeneSpring 7.3.1 software. PLIER expression values were obtained using Expression Console software using default settings. PLIER and GC-RMA data were processed using GeneSpring 7.0 software, with default normalizations (Data transformation:set values<0.01 to 0.01; per chip: normalize to 50th percentile; per gene: normalize to median).	GPL570	1	brain, postcentral gyrus, female, 37 years	Homo sapiens	37	postcentral gyrus		45, C	female
GSM300233	SuperiorFrontalGyrus_female_37yrs_indiv45	RNA	Brain from cognitively intact individual.	GC-RMA expression values were obtained from CEL files using GeneSpring 7.3.1 software. PLIER expression values were obtained using Expression Console software using default settings. PLIER and GC-RMA data were processed using GeneSpring 7.0 software, with default normalizations (Data transformation:set values<0.01 to 0.01; per chip: normalize to 50th percentile; per gene: normalize to median).	GPL570	1	brain, superior frontal gyrus, female, 37 years	Homo sapiens	37	superior frontal gyrus		45, C	female
GSM300234	EntorhinalCortex_male_85yrs_indiv46	RNA	Brain from cognitively intact individual.	GC-RMA expression values were obtained from CEL files using GeneSpring 7.3.1 software. PLIER expression values were obtained using Expression Console software using default settings. PLIER and GC-RMA data were processed using GeneSpring 7.0 software, with default normalizations (Data transformation:set values<0.01 to 0.01; per chip: normalize to 50th percentile; per gene: normalize to median).	GPL570	1	brain, entorhinal cortex, male, 85 years	Homo sapiens	85	entorhinal cortex		46, C	male
GSM300235	Hippocampus_male_85yrs_indiv46	RNA	Brain from cognitively intact individual.	GC-RMA expression values were obtained from CEL files using GeneSpring 7.3.1 software. PLIER expression values were obtained using Expression Console software using default settings. PLIER and GC-RMA data were processed using GeneSpring 7.0 software, with default normalizations (Data transformation:set values<0.01 to 0.01; per chip: normalize to 50th percentile; per gene: normalize to median).	GPL570	1	brain, hippocampus, male, 85 years	Homo sapiens	85	hippocampus		46, C	male
GSM300236	PostcentralGyrus_male_85yrs_indiv46	RNA	Brain from cognitively intact individual.	GC-RMA expression values were obtained from CEL files using GeneSpring 7.3.1 software. PLIER expression values were obtained using Expression Console software using default settings. PLIER and GC-RMA data were processed using GeneSpring 7.0 software, with default normalizations (Data transformation:set values<0.01 to 0.01; per chip: normalize to 50th percentile; per gene: normalize to median).	GPL570	1	brain, postcentral gyrus, male, 85 years	Homo sapiens	85	postcentral gyrus		46, C	male
GSM300237	SuperiorFrontalGyrus_male_85yrs_indiv46	RNA	Brain from cognitively intact individual.	GC-RMA expression values were obtained from CEL files using GeneSpring 7.3.1 software. PLIER expression values were obtained using Expression Console software using default settings. PLIER and GC-RMA data were processed using GeneSpring 7.0 software, with default normalizations (Data transformation:set values<0.01 to 0.01; per chip: normalize to 50th percentile; per gene: normalize to median).	GPL570	1	brain, superior frontal gyrus, male, 85 years	Homo sapiens	85	superior frontal gyrus		46, C	male
GSM300238	EntorhinalCortex_female_70yrs_indiv47	RNA	Brain from cognitively intact individual.	GC-RMA expression values were obtained from CEL files using GeneSpring 7.3.1 software. PLIER expression values were obtained using Expression Console software using default settings. PLIER and GC-RMA data were processed using GeneSpring 7.0 software, with default normalizations (Data transformation:set values<0.01 to 0.01; per chip: normalize to 50th percentile; per gene: normalize to median).	GPL570	1	brain, entorhinal cortex, female, 70 years	Homo sapiens	70	entorhinal cortex		47, C	female
GSM300239	Hippocampus_female_70yrs_indiv47	RNA	Brain from cognitively intact individual.	GC-RMA expression values were obtained from CEL files using GeneSpring 7.3.1 software. PLIER expression values were obtained using Expression Console software using default settings. PLIER and GC-RMA data were processed using GeneSpring 7.0 software, with default normalizations (Data transformation:set values<0.01 to 0.01; per chip: normalize to 50th percentile; per gene: normalize to median).	GPL570	1	brain, hippocampus, female, 70 years	Homo sapiens	70	hippocampus		47, C	female
GSM300240	PostcentralGyrus_female_70yrs_indiv47	RNA	Brain from cognitively intact individual.	GC-RMA expression values were obtained from CEL files using GeneSpring 7.3.1 software. PLIER expression values were obtained using Expression Console software using default settings. PLIER and GC-RMA data were processed using GeneSpring 7.0 software, with default normalizations (Data transformation:set values<0.01 to 0.01; per chip: normalize to 50th percentile; per gene: normalize to median).	GPL570	1	brain, postcentral gyrus, female, 70 years	Homo sapiens	70	postcentral gyrus		47, C	female
GSM300241	SuperiorFrontalGyrus_female_70yrs_indiv47	RNA	Brain from cognitively intact individual.	GC-RMA expression values were obtained from CEL files using GeneSpring 7.3.1 software. PLIER expression values were obtained using Expression Console software using default settings. PLIER and GC-RMA data were processed using GeneSpring 7.0 software, with default normalizations (Data transformation:set values<0.01 to 0.01; per chip: normalize to 50th percentile; per gene: normalize to median).	GPL570	1	brain, superior frontal gyrus, female, 70 years	Homo sapiens	70	superior frontal gyrus		47, C	female
GSM300242	EntorhinalCortex_female_64yrs_indiv52	RNA	Brain from cognitively intact individual.	GC-RMA expression values were obtained from CEL files using GeneSpring 7.3.1 software. PLIER expression values were obtained using Expression Console software using default settings. PLIER and GC-RMA data were processed using GeneSpring 7.0 software, with default normalizations (Data transformation:set values<0.01 to 0.01; per chip: normalize to 50th percentile; per gene: normalize to median).	GPL570	1	brain, entorhinal cortex, female, 64 years	Homo sapiens	64	entorhinal cortex		52, C	female
GSM300243	Hippocampus_female_64yrs_indiv52	RNA	Brain from cognitively intact individual.	GC-RMA expression values were obtained from CEL files using GeneSpring 7.3.1 software. PLIER expression values were obtained using Expression Console software using default settings. PLIER and GC-RMA data were processed using GeneSpring 7.0 software, with default normalizations (Data transformation:set values<0.01 to 0.01; per chip: normalize to 50th percentile; per gene: normalize to median).	GPL570	1	brain, hippocampus, female, 64 years	Homo sapiens	64	hippocampus		52, C	female
GSM300244	PostcentralGyrus_female_64yrs_indiv52	RNA	Brain from cognitively intact individual.	GC-RMA expression values were obtained from CEL files using GeneSpring 7.3.1 software. PLIER expression values were obtained using Expression Console software using default settings. PLIER and GC-RMA data were processed using GeneSpring 7.0 software, with default normalizations (Data transformation:set values<0.01 to 0.01; per chip: normalize to 50th percentile; per gene: normalize to median).	GPL570	1	brain, postcentral gyrus, female, 64 years	Homo sapiens	64	postcentral gyrus		52, C	female
GSM300245	SuperiorFrontalGyrus_female_64yrs_indiv52	RNA	Brain from cognitively intact individual.	GC-RMA expression values were obtained from CEL files using GeneSpring 7.3.1 software. PLIER expression values were obtained using Expression Console software using default settings. PLIER and GC-RMA data were processed using GeneSpring 7.0 software, with default normalizations (Data transformation:set values<0.01 to 0.01; per chip: normalize to 50th percentile; per gene: normalize to median).	GPL570	1	brain, superior frontal gyrus, female, 64 years	Homo sapiens	64	superior frontal gyrus		52, C	female
GSM300246	PostcentralGyrus_male_70yrs_indiv53	RNA	Brain from cognitively intact individual.	GC-RMA expression values were obtained from CEL files using GeneSpring 7.3.1 software. PLIER expression values were obtained using Expression Console software using default settings. PLIER and GC-RMA data were processed using GeneSpring 7.0 software, with default normalizations (Data transformation:set values<0.01 to 0.01; per chip: normalize to 50th percentile; per gene: normalize to median).	GPL570	1	brain, postcentral gyrus, male, 70 years	Homo sapiens	70	postcentral gyrus		53, C	male
GSM300247	SuperiorFrontalGyrus_male_70yrs_indiv53	RNA	Brain from cognitively intact individual.	GC-RMA expression values were obtained from CEL files using GeneSpring 7.3.1 software. PLIER expression values were obtained using Expression Console software using default settings. PLIER and GC-RMA data were processed using GeneSpring 7.0 software, with default normalizations (Data transformation:set values<0.01 to 0.01; per chip: normalize to 50th percentile; per gene: normalize to median).	GPL570	1	brain, superior frontal gyrus, male, 70 years	Homo sapiens	70	superior frontal gyrus		53, C	male
GSM300248	EntorhinalCortex_female_85yrs_indiv54	RNA	Brain from cognitively intact individual.	GC-RMA expression values were obtained from CEL files using GeneSpring 7.3.1 software. PLIER expression values were obtained using Expression Console software using default settings. PLIER and GC-RMA data were processed using GeneSpring 7.0 software, with default normalizations (Data transformation:set values<0.01 to 0.01; per chip: normalize to 50th percentile; per gene: normalize to median).	GPL570	1	brain, entorhinal cortex, female, 85 years	Homo sapiens	85	entorhinal cortex		54, C	female
GSM300249	PostcentralGyrus_female_85yrs_indiv54	RNA	Brain from cognitively intact individual.	GC-RMA expression values were obtained from CEL files using GeneSpring 7.3.1 software. PLIER expression values were obtained using Expression Console software using default settings. PLIER and GC-RMA data were processed using GeneSpring 7.0 software, with default normalizations (Data transformation:set values<0.01 to 0.01; per chip: normalize to 50th percentile; per gene: normalize to median).	GPL570	1	brain, postcentral gyrus, female, 85 years	Homo sapiens	85	postcentral gyrus		54, C	female
GSM300250	SuperiorFrontalGyrus_female_85yrs_indiv54	RNA	Brain from cognitively intact individual.	GC-RMA expression values were obtained from CEL files using GeneSpring 7.3.1 software. PLIER expression values were obtained using Expression Console software using default settings. PLIER and GC-RMA data were processed using GeneSpring 7.0 software, with default normalizations (Data transformation:set values<0.01 to 0.01; per chip: normalize to 50th percentile; per gene: normalize to median).	GPL570	1	brain, superior frontal gyrus, female, 85 years	Homo sapiens	85	superior frontal gyrus		54, C	female
GSM300251	SuperiorFrontalGyrus_female_91yrs_indiv59	RNA	Brain from cognitively intact individual.	GC-RMA expression values were obtained from CEL files using GeneSpring 7.3.1 software. PLIER expression values were obtained using Expression Console software using default settings. PLIER and GC-RMA data were processed using GeneSpring 7.0 software, with default normalizations (Data transformation:set values<0.01 to 0.01; per chip: normalize to 50th percentile; per gene: normalize to median).	GPL570	1	brain, superior frontal gyrus, female, 91 years	Homo sapiens	91	superior frontal gyrus		59, C	female
GSM300252	EntorhinalCortex_male_21yrs_indiv66	RNA	Brain from cognitively intact individual.	GC-RMA expression values were obtained from CEL files using GeneSpring 7.3.1 software. PLIER expression values were obtained using Expression Console software using default settings. PLIER and GC-RMA data were processed using GeneSpring 7.0 software, with default normalizations (Data transformation:set values<0.01 to 0.01; per chip: normalize to 50th percentile; per gene: normalize to median).	GPL570	1	brain, entorhinal cortex, male, 21 years	Homo sapiens	21	entorhinal cortex		66, C	male
GSM300253	PostcentralGyrus_male_21yrs_indiv66	RNA	Brain from cognitively intact individual.	GC-RMA expression values were obtained from CEL files using GeneSpring 7.3.1 software. PLIER expression values were obtained using Expression Console software using default settings. PLIER and GC-RMA data were processed using GeneSpring 7.0 software, with default normalizations (Data transformation:set values<0.01 to 0.01; per chip: normalize to 50th percentile; per gene: normalize to median).	GPL570	1	brain, postcentral gyrus, male, 21 years	Homo sapiens	21	postcentral gyrus		66, C	male
GSM300254	SuperiorFrontalGyrus_male_21yrs_indiv66	RNA	Brain from cognitively intact individual.	GC-RMA expression values were obtained from CEL files using GeneSpring 7.3.1 software. PLIER expression values were obtained using Expression Console software using default settings. PLIER and GC-RMA data were processed using GeneSpring 7.0 software, with default normalizations (Data transformation:set values<0.01 to 0.01; per chip: normalize to 50th percentile; per gene: normalize to median).	GPL570	1	brain, superior frontal gyrus, male, 21 years	Homo sapiens	21	superior frontal gyrus		66, C	male
GSM300255	Hippocampus_male_69yrs_indiv67	RNA	Brain from cognitively intact individual.	GC-RMA expression values were obtained from CEL files using GeneSpring 7.3.1 software. PLIER expression values were obtained using Expression Console software using default settings. PLIER and GC-RMA data were processed using GeneSpring 7.0 software, with default normalizations (Data transformation:set values<0.01 to 0.01; per chip: normalize to 50th percentile; per gene: normalize to median).	GPL570	1	brain, hippocampus, male, 69 years	Homo sapiens	69	hippocampus		67, C	male
GSM300256	PostcentralGyrus_male_69yrs_indiv67	RNA	Brain from cognitively intact individual.	GC-RMA expression values were obtained from CEL files using GeneSpring 7.3.1 software. PLIER expression values were obtained using Expression Console software using default settings. PLIER and GC-RMA data were processed using GeneSpring 7.0 software, with default normalizations (Data transformation:set values<0.01 to 0.01; per chip: normalize to 50th percentile; per gene: normalize to median).	GPL570	1	brain, postcentral gyrus, male, 69 years	Homo sapiens	69	postcentral gyrus		67, C	male
GSM300258	EntorhinalCortex_male_40yrs_indiv68	RNA	Brain from cognitively intact individual.	GC-RMA expression values were obtained from CEL files using GeneSpring 7.3.1 software. PLIER expression values were obtained using Expression Console software using default settings. PLIER and GC-RMA data were processed using GeneSpring 7.0 software, with default normalizations (Data transformation:set values<0.01 to 0.01; per chip: normalize to 50th percentile; per gene: normalize to median).	GPL570	1	brain, entorhinal cortex, male, 40 years	Homo sapiens	40	entorhinal cortex		68, C	male
GSM300259	PostcentralGyrus_male_40yrs_indiv68	RNA	Brain from cognitively intact individual.	GC-RMA expression values were obtained from CEL files using GeneSpring 7.3.1 software. PLIER expression values were obtained using Expression Console software using default settings. PLIER and GC-RMA data were processed using GeneSpring 7.0 software, with default normalizations (Data transformation:set values<0.01 to 0.01; per chip: normalize to 50th percentile; per gene: normalize to median).	GPL570	1	brain, postcentral gyrus, male, 40 years	Homo sapiens	40	postcentral gyrus		68, C	male
GSM300260	SuperiorFrontalGyrus_male_40yrs_indiv68	RNA	Brain from cognitively intact individual.	GC-RMA expression values were obtained from CEL files using GeneSpring 7.3.1 software. PLIER expression values were obtained using Expression Console software using default settings. PLIER and GC-RMA data were processed using GeneSpring 7.0 software, with default normalizations (Data transformation:set values<0.01 to 0.01; per chip: normalize to 50th percentile; per gene: normalize to median).	GPL570	1	brain, superior frontal gyrus, male, 40 years	Homo sapiens	40	superior frontal gyrus		68, C	male
GSM300261	EntorhinalCortex_male_52yrs_indiv71	RNA	Brain from cognitively intact individual.	GC-RMA expression values were obtained from CEL files using GeneSpring 7.3.1 software. PLIER expression values were obtained using Expression Console software using default settings. PLIER and GC-RMA data were processed using GeneSpring 7.0 software, with default normalizations (Data transformation:set values<0.01 to 0.01; per chip: normalize to 50th percentile; per gene: normalize to median).	GPL570	1	brain, entorhinal cortex, male, 52 years	Homo sapiens	52	entorhinal cortex		71, C	male
GSM300262	Hippocampus_male_52yrs_indiv71	RNA	Brain from cognitively intact individual.	GC-RMA expression values were obtained from CEL files using GeneSpring 7.3.1 software. PLIER expression values were obtained using Expression Console software using default settings. PLIER and GC-RMA data were processed using GeneSpring 7.0 software, with default normalizations (Data transformation:set values<0.01 to 0.01; per chip: normalize to 50th percentile; per gene: normalize to median).	GPL570	1	brain, hippocampus, male, 52 years	Homo sapiens	52	hippocampus		71, C	male
GSM300263	PostcentralGyrus_male_52yrs_indiv71	RNA	Brain from cognitively intact individual.	GC-RMA expression values were obtained from CEL files using GeneSpring 7.3.1 software. PLIER expression values were obtained using Expression Console software using default settings. PLIER and GC-RMA data were processed using GeneSpring 7.0 software, with default normalizations (Data transformation:set values<0.01 to 0.01; per chip: normalize to 50th percentile; per gene: normalize to median).	GPL570	1	brain, postcentral gyrus, male, 52 years	Homo sapiens	52	postcentral gyrus		71, C	male
GSM300264	SuperiorFrontalGyrus_male_52yrs_indiv71	RNA	Brain from cognitively intact individual.	GC-RMA expression values were obtained from CEL files using GeneSpring 7.3.1 software. PLIER expression values were obtained using Expression Console software using default settings. PLIER and GC-RMA data were processed using GeneSpring 7.0 software, with default normalizations (Data transformation:set values<0.01 to 0.01; per chip: normalize to 50th percentile; per gene: normalize to median).	GPL570	1	brain, superior frontal gyrus, male, 52 years	Homo sapiens	52	superior frontal gyrus		71, C	male
GSM300265	PostcentralGyrus_male_75yrs_indiv72	RNA	Brain from cognitively intact individual.	GC-RMA expression values were obtained from CEL files using GeneSpring 7.3.1 software. PLIER expression values were obtained using Expression Console software using default settings. PLIER and GC-RMA data were processed using GeneSpring 7.0 software, with default normalizations (Data transformation:set values<0.01 to 0.01; per chip: normalize to 50th percentile; per gene: normalize to median).	GPL570	1	brain, postcentral gyrus, male, 75 years	Homo sapiens	75	postcentral gyrus		72, C	male
GSM300266	SuperiorFrontalGyrus_male_75yrs_indiv72	RNA	Brain from cognitively intact individual.	GC-RMA expression values were obtained from CEL files using GeneSpring 7.3.1 software. PLIER expression values were obtained using Expression Console software using default settings. PLIER and GC-RMA data were processed using GeneSpring 7.0 software, with default normalizations (Data transformation:set values<0.01 to 0.01; per chip: normalize to 50th percentile; per gene: normalize to median).	GPL570	1	brain, superior frontal gyrus, male, 75 years	Homo sapiens	75	superior frontal gyrus		72, C	male
GSM300267	EntorhinalCortex_male_86yrs_indiv73	RNA	Brain from cognitively intact individual.	GC-RMA expression values were obtained from CEL files using GeneSpring 7.3.1 software. PLIER expression values were obtained using Expression Console software using default settings. PLIER and GC-RMA data were processed using GeneSpring 7.0 software, with default normalizations (Data transformation:set values<0.01 to 0.01; per chip: normalize to 50th percentile; per gene: normalize to median).	GPL570	1	brain, entorhinal cortex, male, 86 years	Homo sapiens	86	entorhinal cortex		73, C	male
GSM300268	Hippocampus_male_86yrs_indiv73	RNA	Brain from cognitively intact individual.	GC-RMA expression values were obtained from CEL files using GeneSpring 7.3.1 software. PLIER expression values were obtained using Expression Console software using default settings. PLIER and GC-RMA data were processed using GeneSpring 7.0 software, with default normalizations (Data transformation:set values<0.01 to 0.01; per chip: normalize to 50th percentile; per gene: normalize to median).	GPL570	1	brain, hippocampus, male, 86 years	Homo sapiens	86	hippocampus		73, C	male
GSM300269	PostcentralGyrus_male_86yrs_indiv73	RNA	Brain from cognitively intact individual.	GC-RMA expression values were obtained from CEL files using GeneSpring 7.3.1 software. PLIER expression values were obtained using Expression Console software using default settings. PLIER and GC-RMA data were processed using GeneSpring 7.0 software, with default normalizations (Data transformation:set values<0.01 to 0.01; per chip: normalize to 50th percentile; per gene: normalize to median).	GPL570	1	brain, postcentral gyrus, male, 86 years	Homo sapiens	86	postcentral gyrus		73, C	male
GSM300270	SuperiorFrontalGyrus_male_86yrs_indiv73	RNA	Brain from cognitively intact individual.	GC-RMA expression values were obtained from CEL files using GeneSpring 7.3.1 software. PLIER expression values were obtained using Expression Console software using default settings. PLIER and GC-RMA data were processed using GeneSpring 7.0 software, with default normalizations (Data transformation:set values<0.01 to 0.01; per chip: normalize to 50th percentile; per gene: normalize to median).	GPL570	1	brain, superior frontal gyrus, male, 86 years	Homo sapiens	86	superior frontal gyrus		73, C	male
GSM300271	EntorhinalCortex_female_26yrs_indiv76	RNA	Brain from cognitively intact individual.	GC-RMA expression values were obtained from CEL files using GeneSpring 7.3.1 software. PLIER expression values were obtained using Expression Console software using default settings. PLIER and GC-RMA data were processed using GeneSpring 7.0 software, with default normalizations (Data transformation:set values<0.01 to 0.01; per chip: normalize to 50th percentile; per gene: normalize to median).	GPL570	1	brain, entorhinal cortex, female, 26 years	Homo sapiens	26	entorhinal cortex		76, C	female
GSM300272	Hippocampus_female_26yrs_indiv76	RNA	Brain from cognitively intact individual.	GC-RMA expression values were obtained from CEL files using GeneSpring 7.3.1 software. PLIER expression values were obtained using Expression Console software using default settings. PLIER and GC-RMA data were processed using GeneSpring 7.0 software, with default normalizations (Data transformation:set values<0.01 to 0.01; per chip: normalize to 50th percentile; per gene: normalize to median).	GPL570	1	brain, hippocampus, female, 26 years	Homo sapiens	26	hippocampus		76, C	female
GSM300273	PostcentralGyrus_female_26yrs_indiv76	RNA	Brain from cognitively intact individual.	GC-RMA expression values were obtained from CEL files using GeneSpring 7.3.1 software. PLIER expression values were obtained using Expression Console software using default settings. PLIER and GC-RMA data were processed using GeneSpring 7.0 software, with default normalizations (Data transformation:set values<0.01 to 0.01; per chip: normalize to 50th percentile; per gene: normalize to median).	GPL570	1	brain, postcentral gyrus, female, 26 years	Homo sapiens	26	postcentral gyrus		76, C	female
GSM300274	SuperiorFrontalGyrus_female_26yrs_indiv76	RNA	Brain from cognitively intact individual.	GC-RMA expression values were obtained from CEL files using GeneSpring 7.3.1 software. PLIER expression values were obtained using Expression Console software using default settings. PLIER and GC-RMA data were processed using GeneSpring 7.0 software, with default normalizations (Data transformation:set values<0.01 to 0.01; per chip: normalize to 50th percentile; per gene: normalize to median).	GPL570	1	brain, superior frontal gyrus, female, 26 years	Homo sapiens	26	superior frontal gyrus		76, C	female
GSM300275	EntorhinalCortex_male_20yrs_indiv77	RNA	Brain from cognitively intact individual.	GC-RMA expression values were obtained from CEL files using GeneSpring 7.3.1 software. PLIER expression values were obtained using Expression Console software using default settings. PLIER and GC-RMA data were processed using GeneSpring 7.0 software, with default normalizations (Data transformation:set values<0.01 to 0.01; per chip: normalize to 50th percentile; per gene: normalize to median).	GPL570	1	brain, entorhinal cortex, male, 20 years	Homo sapiens	20	entorhinal cortex		77, C	male
GSM300276	Hippocampus_male_20yrs_indiv77	RNA	Brain from cognitively intact individual.	GC-RMA expression values were obtained from CEL files using GeneSpring 7.3.1 software. PLIER expression values were obtained using Expression Console software using default settings. PLIER and GC-RMA data were processed using GeneSpring 7.0 software, with default normalizations (Data transformation:set values<0.01 to 0.01; per chip: normalize to 50th percentile; per gene: normalize to median).	GPL570	1	brain, hippocampus, male, 20 years	Homo sapiens	20	hippocampus		77, C	male
GSM300277	PostcentralGyrus_male_20yrs_indiv77	RNA	Brain from cognitively intact individual.	GC-RMA expression values were obtained from CEL files using GeneSpring 7.3.1 software. PLIER expression values were obtained using Expression Console software using default settings. PLIER and GC-RMA data were processed using GeneSpring 7.0 software, with default normalizations (Data transformation:set values<0.01 to 0.01; per chip: normalize to 50th percentile; per gene: normalize to median).	GPL570	1	brain, postcentral gyrus, male, 20 years	Homo sapiens	20	postcentral gyrus		77, C	male
GSM300278	SuperiorFrontalGyrus_male_20yrs_indiv77	RNA	Brain from cognitively intact individual.	GC-RMA expression values were obtained from CEL files using GeneSpring 7.3.1 software. PLIER expression values were obtained using Expression Console software using default settings. PLIER and GC-RMA data were processed using GeneSpring 7.0 software, with default normalizations (Data transformation:set values<0.01 to 0.01; per chip: normalize to 50th percentile; per gene: normalize to median).	GPL570	1	brain, superior frontal gyrus, male, 20 years	Homo sapiens	20	superior frontal gyrus		77, C	male
GSM300279	EntorhinalCortex_male_20yrs_indiv78	RNA	Brain from cognitively intact individual.	GC-RMA expression values were obtained from CEL files using GeneSpring 7.3.1 software. PLIER expression values were obtained using Expression Console software using default settings. PLIER and GC-RMA data were processed using GeneSpring 7.0 software, with default normalizations (Data transformation:set values<0.01 to 0.01; per chip: normalize to 50th percentile; per gene: normalize to median).	GPL570	1	brain, entorhinal cortex, male, 20 years	Homo sapiens	20	entorhinal cortex		78, C	male
GSM300280	Hippocampus_male_20yrs_indiv78	RNA	Brain from cognitively intact individual.	GC-RMA expression values were obtained from CEL files using GeneSpring 7.3.1 software. PLIER expression values were obtained using Expression Console software using default settings. PLIER and GC-RMA data were processed using GeneSpring 7.0 software, with default normalizations (Data transformation:set values<0.01 to 0.01; per chip: normalize to 50th percentile; per gene: normalize to median).	GPL570	1	brain, hippocampus, male, 20 years	Homo sapiens	20	hippocampus		78, C	male
GSM300281	PostcentralGyrus_male_20yrs_indiv78	RNA	Brain from cognitively intact individual.	GC-RMA expression values were obtained from CEL files using GeneSpring 7.3.1 software. PLIER expression values were obtained using Expression Console software using default settings. PLIER and GC-RMA data were processed using GeneSpring 7.0 software, with default normalizations (Data transformation:set values<0.01 to 0.01; per chip: normalize to 50th percentile; per gene: normalize to median).	GPL570	1	brain, postcentral gyrus, male, 20 years	Homo sapiens	20	postcentral gyrus		78, C	male
GSM300282	SuperiorFrontalGyrus_male_20yrs_indiv78	RNA	Brain from cognitively intact individual.	GC-RMA expression values were obtained from CEL files using GeneSpring 7.3.1 software. PLIER expression values were obtained using Expression Console software using default settings. PLIER and GC-RMA data were processed using GeneSpring 7.0 software, with default normalizations (Data transformation:set values<0.01 to 0.01; per chip: normalize to 50th percentile; per gene: normalize to median).	GPL570	1	brain, superior frontal gyrus, male, 20 years	Homo sapiens	20	superior frontal gyrus		78, C	male
GSM300283	PostcentralGyrus_female_36yrs_indiv79	RNA	Brain from cognitively intact individual.	GC-RMA expression values were obtained from CEL files using GeneSpring 7.3.1 software. PLIER expression values were obtained using Expression Console software using default settings. PLIER and GC-RMA data were processed using GeneSpring 7.0 software, with default normalizations (Data transformation:set values<0.01 to 0.01; per chip: normalize to 50th percentile; per gene: normalize to median).	GPL570	1	brain, postcentral gyrus, female, 36 years	Homo sapiens	36	postcentral gyrus		79, AA	female
GSM300284	SuperiorFrontalGyrus_female_36yrs_indiv79	RNA	Brain from cognitively intact individual.	GC-RMA expression values were obtained from CEL files using GeneSpring 7.3.1 software. PLIER expression values were obtained using Expression Console software using default settings. PLIER and GC-RMA data were processed using GeneSpring 7.0 software, with default normalizations (Data transformation:set values<0.01 to 0.01; per chip: normalize to 50th percentile; per gene: normalize to median).	GPL570	1	brain, superior frontal gyrus, female, 36 years	Homo sapiens	36	superior frontal gyrus		79, AA	female
GSM300285	EntorhinalCortex_male_69yrs_indiv8	RNA	Brain from cognitively intact individual.	GC-RMA expression values were obtained from CEL files using GeneSpring 7.3.1 software. PLIER expression values were obtained using Expression Console software using default settings. PLIER and GC-RMA data were processed using GeneSpring 7.0 software, with default normalizations (Data transformation:set values<0.01 to 0.01; per chip: normalize to 50th percentile; per gene: normalize to median).	GPL570	1	brain, entorhinal cortex, male, 69 years	Homo sapiens	69	entorhinal cortex		8, C	male
GSM300286	Hippocampus_male_69yrs_indiv8	RNA	Brain from cognitively intact individual.	GC-RMA expression values were obtained from CEL files using GeneSpring 7.3.1 software. PLIER expression values were obtained using Expression Console software using default settings. PLIER and GC-RMA data were processed using GeneSpring 7.0 software, with default normalizations (Data transformation:set values<0.01 to 0.01; per chip: normalize to 50th percentile; per gene: normalize to median).	GPL570	1	brain, hippocampus, male, 69 years	Homo sapiens	69	hippocampus		8, C	male
GSM300287	PostcentralGyrus_male_69yrs_indiv8	RNA	Brain from cognitively intact individual.	GC-RMA expression values were obtained from CEL files using GeneSpring 7.3.1 software. PLIER expression values were obtained using Expression Console software using default settings. PLIER and GC-RMA data were processed using GeneSpring 7.0 software, with default normalizations (Data transformation:set values<0.01 to 0.01; per chip: normalize to 50th percentile; per gene: normalize to median).	GPL570	1	brain, postcentral gyrus, male, 69 years	Homo sapiens	69	postcentral gyrus		8, C	male
GSM300288	SuperiorFrontalGyrus_male_69yrs_indiv8	RNA	Brain from cognitively intact individual.	GC-RMA expression values were obtained from CEL files using GeneSpring 7.3.1 software. PLIER expression values were obtained using Expression Console software using default settings. PLIER and GC-RMA data were processed using GeneSpring 7.0 software, with default normalizations (Data transformation:set values<0.01 to 0.01; per chip: normalize to 50th percentile; per gene: normalize to median).	GPL570	1	brain, superior frontal gyrus, male, 69 years	Homo sapiens	69	superior frontal gyrus		8, C	male
GSM300289	EntorhinalCortex_female_44yrs_indiv80	RNA	Brain from cognitively intact individual.	GC-RMA expression values were obtained from CEL files using GeneSpring 7.3.1 software. PLIER expression values were obtained using Expression Console software using default settings. PLIER and GC-RMA data were processed using GeneSpring 7.0 software, with default normalizations (Data transformation:set values<0.01 to 0.01; per chip: normalize to 50th percentile; per gene: normalize to median).	GPL570	1	brain, entorhinal cortex, female, 44 years	Homo sapiens	44	entorhinal cortex		80, AA	female
GSM300290	Hippocampus_female_44yrs_indiv80	RNA	Brain from cognitively intact individual.	GC-RMA expression values were obtained from CEL files using GeneSpring 7.3.1 software. PLIER expression values were obtained using Expression Console software using default settings. PLIER and GC-RMA data were processed using GeneSpring 7.0 software, with default normalizations (Data transformation:set values<0.01 to 0.01; per chip: normalize to 50th percentile; per gene: normalize to median).	GPL570	1	brain, hippocampus, female, 44 years	Homo sapiens	44	hippocampus		80, AA	female
GSM300291	PostcentralGyrus_female_44yrs_indiv80	RNA	Brain from cognitively intact individual.	GC-RMA expression values were obtained from CEL files using GeneSpring 7.3.1 software. PLIER expression values were obtained using Expression Console software using default settings. PLIER and GC-RMA data were processed using GeneSpring 7.0 software, with default normalizations (Data transformation:set values<0.01 to 0.01; per chip: normalize to 50th percentile; per gene: normalize to median).	GPL570	1	brain, postcentral gyrus, female, 44 years	Homo sapiens	44	postcentral gyrus		80, AA	female
GSM300292	SuperiorFrontalGyrus_female_44yrs_indiv80	RNA	Brain from cognitively intact individual.	GC-RMA expression values were obtained from CEL files using GeneSpring 7.3.1 software. PLIER expression values were obtained using Expression Console software using default settings. PLIER and GC-RMA data were processed using GeneSpring 7.0 software, with default normalizations (Data transformation:set values<0.01 to 0.01; per chip: normalize to 50th percentile; per gene: normalize to median).	GPL570	1	brain, superior frontal gyrus, female, 44 years	Homo sapiens	44	superior frontal gyrus		80, AA	female
GSM300293	EntorhinalCortex_female_48yrs_indiv81	RNA	Brain from cognitively intact individual.	GC-RMA expression values were obtained from CEL files using GeneSpring 7.3.1 software. PLIER expression values were obtained using Expression Console software using default settings. PLIER and GC-RMA data were processed using GeneSpring 7.0 software, with default normalizations (Data transformation:set values<0.01 to 0.01; per chip: normalize to 50th percentile; per gene: normalize to median).	GPL570	1	brain, entorhinal cortex, female, 48 years	Homo sapiens	48	entorhinal cortex		81, AA	female
GSM300294	Hippocampus_female_48yrs_indiv81	RNA	Brain from cognitively intact individual.	GC-RMA expression values were obtained from CEL files using GeneSpring 7.3.1 software. PLIER expression values were obtained using Expression Console software using default settings. PLIER and GC-RMA data were processed using GeneSpring 7.0 software, with default normalizations (Data transformation:set values<0.01 to 0.01; per chip: normalize to 50th percentile; per gene: normalize to median).	GPL570	1	brain, hippocampus, female, 48 years	Homo sapiens	48	hippocampus		81, AA	female
GSM300295	PostcentralGyrus_female_48yrs_indiv81	RNA	Brain from cognitively intact individual.	GC-RMA expression values were obtained from CEL files using GeneSpring 7.3.1 software. PLIER expression values were obtained using Expression Console software using default settings. PLIER and GC-RMA data were processed using GeneSpring 7.0 software, with default normalizations (Data transformation:set values<0.01 to 0.01; per chip: normalize to 50th percentile; per gene: normalize to median).	GPL570	1	brain, postcentral gyrus, female, 48 years	Homo sapiens	48	postcentral gyrus		81, AA	female
GSM300296	SuperiorFrontalGyrus_female_48yrs_indiv81	RNA	Brain from cognitively intact individual.	GC-RMA expression values were obtained from CEL files using GeneSpring 7.3.1 software. PLIER expression values were obtained using Expression Console software using default settings. PLIER and GC-RMA data were processed using GeneSpring 7.0 software, with default normalizations (Data transformation:set values<0.01 to 0.01; per chip: normalize to 50th percentile; per gene: normalize to median).	GPL570	1	brain, superior frontal gyrus, female, 48 years	Homo sapiens	48	superior frontal gyrus		81, AA	female
GSM300297	EntorhinalCortex_female_30yrs_indiv82	RNA	Brain from cognitively intact individual.	GC-RMA expression values were obtained from CEL files using GeneSpring 7.3.1 software. PLIER expression values were obtained using Expression Console software using default settings. PLIER and GC-RMA data were processed using GeneSpring 7.0 software, with default normalizations (Data transformation:set values<0.01 to 0.01; per chip: normalize to 50th percentile; per gene: normalize to median).	GPL570	1	brain, entorhinal cortex, female, 30 years	Homo sapiens	30	entorhinal cortex		82, AA	female
GSM300298	Hippocampus_female_30yrs_indiv82	RNA	Brain from cognitively intact individual.	GC-RMA expression values were obtained from CEL files using GeneSpring 7.3.1 software. PLIER expression values were obtained using Expression Console software using default settings. PLIER and GC-RMA data were processed using GeneSpring 7.0 software, with default normalizations (Data transformation:set values<0.01 to 0.01; per chip: normalize to 50th percentile; per gene: normalize to median).	GPL570	1	brain, hippocampus, female, 30 years	Homo sapiens	30	hippocampus		82, AA	female
GSM300299	SuperiorFrontalGyrus_female_30yrs_indiv82	RNA	Brain from cognitively intact individual.	GC-RMA expression values were obtained from CEL files using GeneSpring 7.3.1 software. PLIER expression values were obtained using Expression Console software using default settings. PLIER and GC-RMA data were processed using GeneSpring 7.0 software, with default normalizations (Data transformation:set values<0.01 to 0.01; per chip: normalize to 50th percentile; per gene: normalize to median).	GPL570	1	brain, superior frontal gyrus, female, 30 years	Homo sapiens	30	superior frontal gyrus		82, AA	female
GSM300300	EntorhinalCortex_male_20yrs_indiv83	RNA	Brain from cognitively intact individual.	GC-RMA expression values were obtained from CEL files using GeneSpring 7.3.1 software. PLIER expression values were obtained using Expression Console software using default settings. PLIER and GC-RMA data were processed using GeneSpring 7.0 software, with default normalizations (Data transformation:set values<0.01 to 0.01; per chip: normalize to 50th percentile; per gene: normalize to median).	GPL570	1	brain, entorhinal cortex, male, 20 years	Homo sapiens	20	entorhinal cortex		83, C	male
GSM300301	Hippocampus_male_20yrs_indiv83	RNA	Brain from cognitively intact individual.	GC-RMA expression values were obtained from CEL files using GeneSpring 7.3.1 software. PLIER expression values were obtained using Expression Console software using default settings. PLIER and GC-RMA data were processed using GeneSpring 7.0 software, with default normalizations (Data transformation:set values<0.01 to 0.01; per chip: normalize to 50th percentile; per gene: normalize to median).	GPL570	1	brain, hippocampus, male, 20 years	Homo sapiens	20	hippocampus		83, C	male
GSM300302	PostcentralGyrus_male_20yrs_indiv83	RNA	Brain from cognitively intact individual.	GC-RMA expression values were obtained from CEL files using GeneSpring 7.3.1 software. PLIER expression values were obtained using Expression Console software using default settings. PLIER and GC-RMA data were processed using GeneSpring 7.0 software, with default normalizations (Data transformation:set values<0.01 to 0.01; per chip: normalize to 50th percentile; per gene: normalize to median).	GPL570	1	brain, postcentral gyrus, male, 20 years	Homo sapiens	20	postcentral gyrus		83, C	male
GSM300303	SuperiorFrontalGyrus_male_20yrs_indiv83	RNA	Brain from cognitively intact individual.	GC-RMA expression values were obtained from CEL files using GeneSpring 7.3.1 software. PLIER expression values were obtained using Expression Console software using default settings. PLIER and GC-RMA data were processed using GeneSpring 7.0 software, with default normalizations (Data transformation:set values<0.01 to 0.01; per chip: normalize to 50th percentile; per gene: normalize to median).	GPL570	1	brain, superior frontal gyrus, male, 20 years	Homo sapiens	20	superior frontal gyrus		83, C	male
GSM300304	EntorhinalCortex_male_33yrs_indiv84	RNA	Brain from cognitively intact individual.	GC-RMA expression values were obtained from CEL files using GeneSpring 7.3.1 software. PLIER expression values were obtained using Expression Console software using default settings. PLIER and GC-RMA data were processed using GeneSpring 7.0 software, with default normalizations (Data transformation:set values<0.01 to 0.01; per chip: normalize to 50th percentile; per gene: normalize to median).	GPL570	1	brain, entorhinal cortex, male, 33 years	Homo sapiens	33	entorhinal cortex		84, AA	male
GSM300305	Hippocampus_male_33yrs_indiv84	RNA	Brain from cognitively intact individual.	GC-RMA expression values were obtained from CEL files using GeneSpring 7.3.1 software. PLIER expression values were obtained using Expression Console software using default settings. PLIER and GC-RMA data were processed using GeneSpring 7.0 software, with default normalizations (Data transformation:set values<0.01 to 0.01; per chip: normalize to 50th percentile; per gene: normalize to median).	GPL570	1	brain, hippocampus, male, 33 years	Homo sapiens	33	hippocampus		84, AA	male
GSM300306	PostcentralGyrus_male_33yrs_indiv84	RNA	Brain from cognitively intact individual.	GC-RMA expression values were obtained from CEL files using GeneSpring 7.3.1 software. PLIER expression values were obtained using Expression Console software using default settings. PLIER and GC-RMA data were processed using GeneSpring 7.0 software, with default normalizations (Data transformation:set values<0.01 to 0.01; per chip: normalize to 50th percentile; per gene: normalize to median).	GPL570	1	brain, postcentral gyrus, male, 33 years	Homo sapiens	33	postcentral gyrus		84, AA	male
GSM300307	SuperiorFrontalGyrus_male_33yrs_indiv84	RNA	Brain from cognitively intact individual.	GC-RMA expression values were obtained from CEL files using GeneSpring 7.3.1 software. PLIER expression values were obtained using Expression Console software using default settings. PLIER and GC-RMA data were processed using GeneSpring 7.0 software, with default normalizations (Data transformation:set values<0.01 to 0.01; per chip: normalize to 50th percentile; per gene: normalize to median).	GPL570	1	brain, superior frontal gyrus, male, 33 years	Homo sapiens	33	superior frontal gyrus		84, AA	male
GSM300308	EntorhinalCortex_male_22yrs_indiv85	RNA	Brain from cognitively intact individual.	GC-RMA expression values were obtained from CEL files using GeneSpring 7.3.1 software. PLIER expression values were obtained using Expression Console software using default settings. PLIER and GC-RMA data were processed using GeneSpring 7.0 software, with default normalizations (Data transformation:set values<0.01 to 0.01; per chip: normalize to 50th percentile; per gene: normalize to median).	GPL570	1	brain, entorhinal cortex, male, 22 years	Homo sapiens	22	entorhinal cortex		85, C	male
GSM300309	Hippocampus_male_22yrs_indiv85	RNA	Brain from cognitively intact individual.	GC-RMA expression values were obtained from CEL files using GeneSpring 7.3.1 software. PLIER expression values were obtained using Expression Console software using default settings. PLIER and GC-RMA data were processed using GeneSpring 7.0 software, with default normalizations (Data transformation:set values<0.01 to 0.01; per chip: normalize to 50th percentile; per gene: normalize to median).	GPL570	1	brain, hippocampus, male, 22 years	Homo sapiens	22	hippocampus		85, C	male
GSM300310	PostcentralGyrus_male_22yrs_indiv85	RNA	Brain from cognitively intact individual.	GC-RMA expression values were obtained from CEL files using GeneSpring 7.3.1 software. PLIER expression values were obtained using Expression Console software using default settings. PLIER and GC-RMA data were processed using GeneSpring 7.0 software, with default normalizations (Data transformation:set values<0.01 to 0.01; per chip: normalize to 50th percentile; per gene: normalize to median).	GPL570	1	brain, postcentral gyrus, male, 22 years	Homo sapiens	22	postcentral gyrus		85, C	male
GSM300311	SuperiorFrontalGyrus_male_22yrs_indiv85	RNA	Brain from cognitively intact individual.	GC-RMA expression values were obtained from CEL files using GeneSpring 7.3.1 software. PLIER expression values were obtained using Expression Console software using default settings. PLIER and GC-RMA data were processed using GeneSpring 7.0 software, with default normalizations (Data transformation:set values<0.01 to 0.01; per chip: normalize to 50th percentile; per gene: normalize to median).	GPL570	1	brain, superior frontal gyrus, male, 22 years	Homo sapiens	22	superior frontal gyrus		85, C	male
GSM300312	EntorhinalCortex_male_42yrs_indiv86	RNA	Brain from cognitively intact individual.	GC-RMA expression values were obtained from CEL files using GeneSpring 7.3.1 software. PLIER expression values were obtained using Expression Console software using default settings. PLIER and GC-RMA data were processed using GeneSpring 7.0 software, with default normalizations (Data transformation:set values<0.01 to 0.01; per chip: normalize to 50th percentile; per gene: normalize to median).	GPL570	1	brain, entorhinal cortex, male, 42 years	Homo sapiens	42	entorhinal cortex		86, AA	male
GSM300313	Hippocampus_male_42yrs_indiv86	RNA	Brain from cognitively intact individual.	GC-RMA expression values were obtained from CEL files using GeneSpring 7.3.1 software. PLIER expression values were obtained using Expression Console software using default settings. PLIER and GC-RMA data were processed using GeneSpring 7.0 software, with default normalizations (Data transformation:set values<0.01 to 0.01; per chip: normalize to 50th percentile; per gene: normalize to median).	GPL570	1	brain, hippocampus, male, 42 years	Homo sapiens	42	hippocampus		86, AA	male
GSM300314	PostcentralGyrus_male_42yrs_indiv86	RNA	Brain from cognitively intact individual.	GC-RMA expression values were obtained from CEL files using GeneSpring 7.3.1 software. PLIER expression values were obtained using Expression Console software using default settings. PLIER and GC-RMA data were processed using GeneSpring 7.0 software, with default normalizations (Data transformation:set values<0.01 to 0.01; per chip: normalize to 50th percentile; per gene: normalize to median).	GPL570	1	brain, postcentral gyrus, male, 42 years	Homo sapiens	42	postcentral gyrus		86, AA	male
GSM300315	SuperiorFrontalGyrus_male_42yrs_indiv86	RNA	Brain from cognitively intact individual.	GC-RMA expression values were obtained from CEL files using GeneSpring 7.3.1 software. PLIER expression values were obtained using Expression Console software using default settings. PLIER and GC-RMA data were processed using GeneSpring 7.0 software, with default normalizations (Data transformation:set values<0.01 to 0.01; per chip: normalize to 50th percentile; per gene: normalize to median).	GPL570	1	brain, superior frontal gyrus, male, 42 years	Homo sapiens	42	superior frontal gyrus		86, AA	male
GSM300316	EntorhinalCortex_male_45yrs_indiv87	RNA	Brain from cognitively intact individual.	GC-RMA expression values were obtained from CEL files using GeneSpring 7.3.1 software. PLIER expression values were obtained using Expression Console software using default settings. PLIER and GC-RMA data were processed using GeneSpring 7.0 software, with default normalizations (Data transformation:set values<0.01 to 0.01; per chip: normalize to 50th percentile; per gene: normalize to median).	GPL570	1	brain, entorhinal cortex, male, 45 years	Homo sapiens	45	entorhinal cortex		87, C	male
GSM300317	Hippocampus_male_45yrs_indiv87	RNA	Brain from cognitively intact individual.	GC-RMA expression values were obtained from CEL files using GeneSpring 7.3.1 software. PLIER expression values were obtained using Expression Console software using default settings. PLIER and GC-RMA data were processed using GeneSpring 7.0 software, with default normalizations (Data transformation:set values<0.01 to 0.01; per chip: normalize to 50th percentile; per gene: normalize to median).	GPL570	1	brain, hippocampus, male, 45 years	Homo sapiens	45	hippocampus		87, C	male
GSM300318	PostcentralGyrus_male_45yrs_indiv87	RNA	Brain from cognitively intact individual.	GC-RMA expression values were obtained from CEL files using GeneSpring 7.3.1 software. PLIER expression values were obtained using Expression Console software using default settings. PLIER and GC-RMA data were processed using GeneSpring 7.0 software, with default normalizations (Data transformation:set values<0.01 to 0.01; per chip: normalize to 50th percentile; per gene: normalize to median).	GPL570	1	brain, postcentral gyrus, male, 45 years	Homo sapiens	45	postcentral gyrus		87, C	male
GSM300319	SuperiorFrontalGyrus_male_45yrs_indiv87	RNA	Brain from cognitively intact individual.	GC-RMA expression values were obtained from CEL files using GeneSpring 7.3.1 software. PLIER expression values were obtained using Expression Console software using default settings. PLIER and GC-RMA data were processed using GeneSpring 7.0 software, with default normalizations (Data transformation:set values<0.01 to 0.01; per chip: normalize to 50th percentile; per gene: normalize to median).	GPL570	1	brain, superior frontal gyrus, male, 45 years	Homo sapiens	45	superior frontal gyrus		87, C	male
GSM300320	EntorhinalCortex_female_47yrs_indiv88	RNA	Brain from cognitively intact individual.	GC-RMA expression values were obtained from CEL files using GeneSpring 7.3.1 software. PLIER expression values were obtained using Expression Console software using default settings. PLIER and GC-RMA data were processed using GeneSpring 7.0 software, with default normalizations (Data transformation:set values<0.01 to 0.01; per chip: normalize to 50th percentile; per gene: normalize to median).	GPL570	1	brain, entorhinal cortex, female, 47 years	Homo sapiens	47	entorhinal cortex		88, AA	female
GSM300321	Hippocampus_female_47yrs_indiv88	RNA	Brain from cognitively intact individual.	GC-RMA expression values were obtained from CEL files using GeneSpring 7.3.1 software. PLIER expression values were obtained using Expression Console software using default settings. PLIER and GC-RMA data were processed using GeneSpring 7.0 software, with default normalizations (Data transformation:set values<0.01 to 0.01; per chip: normalize to 50th percentile; per gene: normalize to median).	GPL570	1	brain, hippocampus, female, 47 years	Homo sapiens	47	hippocampus		88, AA	female
GSM300322	PostcentralGyrus_female_47yrs_indiv88	RNA	Brain from cognitively intact individual.	GC-RMA expression values were obtained from CEL files using GeneSpring 7.3.1 software. PLIER expression values were obtained using Expression Console software using default settings. PLIER and GC-RMA data were processed using GeneSpring 7.0 software, with default normalizations (Data transformation:set values<0.01 to 0.01; per chip: normalize to 50th percentile; per gene: normalize to median).	GPL570	1	brain, postcentral gyrus, female, 47 years	Homo sapiens	47	postcentral gyrus		88, AA	female
GSM300323	SuperiorFrontalGyrus_female_47yrs_indiv88	RNA	Brain from cognitively intact individual.	GC-RMA expression values were obtained from CEL files using GeneSpring 7.3.1 software. PLIER expression values were obtained using Expression Console software using default settings. PLIER and GC-RMA data were processed using GeneSpring 7.0 software, with default normalizations (Data transformation:set values<0.01 to 0.01; per chip: normalize to 50th percentile; per gene: normalize to median).	GPL570	1	brain, superior frontal gyrus, female, 47 years	Homo sapiens	47	superior frontal gyrus		88, AA	female
GSM300324	EntorhinalCortex_male_69yrs_indiv93	RNA	Brain from cognitively intact individual.	GC-RMA expression values were obtained from CEL files using GeneSpring 7.3.1 software. PLIER expression values were obtained using Expression Console software using default settings. PLIER and GC-RMA data were processed using GeneSpring 7.0 software, with default normalizations (Data transformation:set values<0.01 to 0.01; per chip: normalize to 50th percentile; per gene: normalize to median).	GPL570	1	brain, entorhinal cortex, male, 69 years	Homo sapiens	69	entorhinal cortex		93, C	male
GSM300325	Hippocampus_male_69yrs_indiv93	RNA	Brain from cognitively intact individual.	GC-RMA expression values were obtained from CEL files using GeneSpring 7.3.1 software. PLIER expression values were obtained using Expression Console software using default settings. PLIER and GC-RMA data were processed using GeneSpring 7.0 software, with default normalizations (Data transformation:set values<0.01 to 0.01; per chip: normalize to 50th percentile; per gene: normalize to median).	GPL570	1	brain, hippocampus, male, 69 years	Homo sapiens	69	hippocampus		93, C	male
GSM300326	PostcentralGyrus_male_69yrs_indiv93	RNA	Brain from cognitively intact individual.	GC-RMA expression values were obtained from CEL files using GeneSpring 7.3.1 software. PLIER expression values were obtained using Expression Console software using default settings. PLIER and GC-RMA data were processed using GeneSpring 7.0 software, with default normalizations (Data transformation:set values<0.01 to 0.01; per chip: normalize to 50th percentile; per gene: normalize to median).	GPL570	1	brain, postcentral gyrus, male, 69 years	Homo sapiens	69	postcentral gyrus		93, C	male
GSM300327	SuperiorFrontalGyrus_male_69yrs_indiv93	RNA	Brain from cognitively intact individual.	GC-RMA expression values were obtained from CEL files using GeneSpring 7.3.1 software. PLIER expression values were obtained using Expression Console software using default settings. PLIER and GC-RMA data were processed using GeneSpring 7.0 software, with default normalizations (Data transformation:set values<0.01 to 0.01; per chip: normalize to 50th percentile; per gene: normalize to median).	GPL570	1	brain, superior frontal gyrus, male, 69 years	Homo sapiens	69	superior frontal gyrus		93, C	male
GSM300328	EntorhinalCortex_female_91yrs_indiv94	RNA	Brain from cognitively intact individual.	GC-RMA expression values were obtained from CEL files using GeneSpring 7.3.1 software. PLIER expression values were obtained using Expression Console software using default settings. PLIER and GC-RMA data were processed using GeneSpring 7.0 software, with default normalizations (Data transformation:set values<0.01 to 0.01; per chip: normalize to 50th percentile; per gene: normalize to median).	GPL570	1	brain, entorhinal cortex, female, 91 years	Homo sapiens	91	entorhinal cortex		94, C	female
GSM300329	Hippocampus_female_91yrs_indiv94	RNA	Brain from cognitively intact individual.	GC-RMA expression values were obtained from CEL files using GeneSpring 7.3.1 software. PLIER expression values were obtained using Expression Console software using default settings. PLIER and GC-RMA data were processed using GeneSpring 7.0 software, with default normalizations (Data transformation:set values<0.01 to 0.01; per chip: normalize to 50th percentile; per gene: normalize to median).	GPL570	1	brain, hippocampus, female, 91 years	Homo sapiens	91	hippocampus		94, C	female
GSM300330	PostcentralGyrus_female_91yrs_indiv94	RNA	Brain from cognitively intact individual.	GC-RMA expression values were obtained from CEL files using GeneSpring 7.3.1 software. PLIER expression values were obtained using Expression Console software using default settings. PLIER and GC-RMA data were processed using GeneSpring 7.0 software, with default normalizations (Data transformation:set values<0.01 to 0.01; per chip: normalize to 50th percentile; per gene: normalize to median).	GPL570	1	brain, postcentral gyrus, female, 91 years	Homo sapiens	91	postcentral gyrus		94, C	female
GSM300331	SuperiorFrontalGyrus_female_91yrs_indiv94	RNA	Brain from cognitively intact individual.	GC-RMA expression values were obtained from CEL files using GeneSpring 7.3.1 software. PLIER expression values were obtained using Expression Console software using default settings. PLIER and GC-RMA data were processed using GeneSpring 7.0 software, with default normalizations (Data transformation:set values<0.01 to 0.01; per chip: normalize to 50th percentile; per gene: normalize to median).	GPL570	1	brain, superior frontal gyrus, female, 91 years	Homo sapiens	91	superior frontal gyrus		94, C	female
GSM300332	EntorhinalCortex_male_75yrs_indiv96	RNA	Brain from cognitively intact individual.	GC-RMA expression values were obtained from CEL files using GeneSpring 7.3.1 software. PLIER expression values were obtained using Expression Console software using default settings. PLIER and GC-RMA data were processed using GeneSpring 7.0 software, with default normalizations (Data transformation:set values<0.01 to 0.01; per chip: normalize to 50th percentile; per gene: normalize to median).	GPL570	1	brain, entorhinal cortex, male, 75 years	Homo sapiens	75	entorhinal cortex		96, C	male
GSM300333	Hippocampus_male_75yrs_indiv96	RNA	Brain from cognitively intact individual.	GC-RMA expression values were obtained from CEL files using GeneSpring 7.3.1 software. PLIER expression values were obtained using Expression Console software using default settings. PLIER and GC-RMA data were processed using GeneSpring 7.0 software, with default normalizations (Data transformation:set values<0.01 to 0.01; per chip: normalize to 50th percentile; per gene: normalize to median).	GPL570	1	brain, hippocampus, male, 75 years	Homo sapiens	75	hippocampus		96, C	male
GSM300335	SuperiorFrontalGyrus_male_75yrs_indiv96	RNA	Brain from cognitively intact individual.	GC-RMA expression values were obtained from CEL files using GeneSpring 7.3.1 software. PLIER expression values were obtained using Expression Console software using default settings. PLIER and GC-RMA data were processed using GeneSpring 7.0 software, with default normalizations (Data transformation:set values<0.01 to 0.01; per chip: normalize to 50th percentile; per gene: normalize to median).	GPL570	1	brain, superior frontal gyrus, male, 75 years	Homo sapiens	75	superior frontal gyrus		96, C	male
GSM300338	EntorhinalCortex_female_82yrs_indiv98	RNA	Brain from cognitively intact individual.	GC-RMA expression values were obtained from CEL files using GeneSpring 7.3.1 software. PLIER expression values were obtained using Expression Console software using default settings. PLIER and GC-RMA data were processed using GeneSpring 7.0 software, with default normalizations (Data transformation:set values<0.01 to 0.01; per chip: normalize to 50th percentile; per gene: normalize to median).	GPL570	1	brain, entorhinal cortex, female, 82 years	Homo sapiens	82	entorhinal cortex		98, C	female
GSM300339	Hippocampus_female_82yrs_indiv98	RNA	Brain from cognitively intact individual.	GC-RMA expression values were obtained from CEL files using GeneSpring 7.3.1 software. PLIER expression values were obtained using Expression Console software using default settings. PLIER and GC-RMA data were processed using GeneSpring 7.0 software, with default normalizations (Data transformation:set values<0.01 to 0.01; per chip: normalize to 50th percentile; per gene: normalize to median).	GPL570	1	brain, hippocampus, female, 82 years	Homo sapiens	82	hippocampus		98, C	female
GSM300340	PostcentralGyrus_female_82yrs_indiv98	RNA	Brain from cognitively intact individual.	GC-RMA expression values were obtained from CEL files using GeneSpring 7.3.1 software. PLIER expression values were obtained using Expression Console software using default settings. PLIER and GC-RMA data were processed using GeneSpring 7.0 software, with default normalizations (Data transformation:set values<0.01 to 0.01; per chip: normalize to 50th percentile; per gene: normalize to median).	GPL570	1	brain, postcentral gyrus, female, 82 years	Homo sapiens	82	postcentral gyrus		98, C	female
GSM300341	SuperiorFrontalGyrus_female_82yrs_indiv98	RNA	Brain from cognitively intact individual.	GC-RMA expression values were obtained from CEL files using GeneSpring 7.3.1 software. PLIER expression values were obtained using Expression Console software using default settings. PLIER and GC-RMA data were processed using GeneSpring 7.0 software, with default normalizations (Data transformation:set values<0.01 to 0.01; per chip: normalize to 50th percentile; per gene: normalize to median).	GPL570	1	brain, superior frontal gyrus, female, 82 years	Homo sapiens	82	superior frontal gyrus		98, C	female
GSM318840	SuperiorFrontalGyrus_male_66yrs_indiv63	RNA	Postmortem brain tissue from cognitively intact individual.	GC-RMA expression values were obtained from CEL files using GeneSpring 7.3.1 software. PLIER expression values were obtained using Expression Console software using default settings. PLIER and GC-RMA data were processed using GeneSpring 7.0 software, with default normalizations (Data transformation:set values<0.01 to 0.01; per chip: normalize to 50th percentile; per gene: normalize to median).	GPL570	1	brain, superior frontal gyrus, male, 66 years	Homo sapiens	66	superior frontal gyrus		63, C	male
GSM350078	SuperiorFrontalGyrus_male_80yrs_indiv15	RNA	Brain from cognitively intact individual.	GC-RMA expression values were obtained from CEL files using GeneSpring 7.3.1 software. PLIER expression values were obtained using Expression Console software using default settings. PLIER and GC-RMA data were processed using GeneSpring 7.0 software, with default normalizations (Data transformation:set values<0.01 to 0.01; per chip: normalize to 50th percentile; per gene: normalize to median).	GPL570	1	brain, superior frontal gyrus, male, 80 years	Homo sapiens	80	superior frontal gyrus		15, C	male
GSM1176196	entorhinal cortex_female_76_AD_48	RNA	post-mortem tissue	GC-RMA, using Genespring 7.3. data transformation: measurements <0.01 set to 0.01; per chip: normalized to the 50th percentile; per gene: normalize to median	GPL570	1	entorhinal cortex_female_AD	Homo sapiens	76	entorhinal cortex	V		female	3	3,3
GSM1176197	entorhinal cortex_female_86_AD_15	RNA	post-mortem tissue	GC-RMA, using Genespring 7.3. data transformation: measurements <0.01 set to 0.01; per chip: normalized to the 50th percentile; per gene: normalize to median	GPL570	1	entorhinal cortex_female_AD	Homo sapiens	86	entorhinal cortex	VI		female	9	4,4
GSM1176198	entorhinal cortex_female_82_AD_9	RNA	post-mortem tissue	GC-RMA, using Genespring 7.3. data transformation: measurements <0.01 set to 0.01; per chip: normalized to the 50th percentile; per gene: normalize to median	GPL570	1	entorhinal cortex_female_AD	Homo sapiens	82	entorhinal cortex	VI		female	0	3,4
GSM1176199	entorhinal cortex_female_85_AD_24	RNA	post-mortem tissue	GC-RMA, using Genespring 7.3. data transformation: measurements <0.01 set to 0.01; per chip: normalized to the 50th percentile; per gene: normalize to median	GPL570	1	entorhinal cortex_female_AD	Homo sapiens	85	entorhinal cortex	IV		female	26	3,4
GSM1176200	entorhinal cortex_female_90_AD_36	RNA	post-mortem tissue	GC-RMA, using Genespring 7.3. data transformation: measurements <0.01 set to 0.01; per chip: normalized to the 50th percentile; per gene: normalize to median	GPL570	1	entorhinal cortex_female_AD	Homo sapiens	90	entorhinal cortex	IV		female	17	3,4
GSM1176201	entorhinal cortex_female_90_AD_6	RNA	post-mortem tissue	GC-RMA, using Genespring 7.3. data transformation: measurements <0.01 set to 0.01; per chip: normalized to the 50th percentile; per gene: normalize to median	GPL570	1	entorhinal cortex_female_AD	Homo sapiens	90	entorhinal cortex	V		female	20	3,4
GSM1176202	entorhinal cortex_female_90_AD_75	RNA	post-mortem tissue	GC-RMA, using Genespring 7.3. data transformation: measurements <0.01 set to 0.01; per chip: normalized to the 50th percentile; per gene: normalize to median	GPL570	1	entorhinal cortex_female_AD	Homo sapiens	90	entorhinal cortex	III		female	no info	4,4
GSM1176203	entorhinal cortex_female_91_AD_11	RNA	post-mortem tissue	GC-RMA, using Genespring 7.3. data transformation: measurements <0.01 set to 0.01; per chip: normalized to the 50th percentile; per gene: normalize to median	GPL570	1	entorhinal cortex_female_AD	Homo sapiens	91	entorhinal cortex	V-VI		female	11	4,4
GSM1176204	entorhinal cortex_male_76_AD_69	RNA	post-mortem tissue	GC-RMA, using Genespring 7.3. data transformation: measurements <0.01 set to 0.01; per chip: normalized to the 50th percentile; per gene: normalize to median	GPL570	1	entorhinal cortex_male_AD	Homo sapiens	76	entorhinal cortex	III		male	no info	4,4
GSM1176205	entorhinal cortex_male_85_AD_51	RNA	post-mortem tissue	GC-RMA, using Genespring 7.3. data transformation: measurements <0.01 set to 0.01; per chip: normalized to the 50th percentile; per gene: normalize to median	GPL570	1	entorhinal cortex_male_AD	Homo sapiens	85	entorhinal cortex	III		male	22	3,3
GSM1176206	entorhinal cortex_male_85_AD_74	RNA	post-mortem tissue	GC-RMA, using Genespring 7.3. data transformation: measurements <0.01 set to 0.01; per chip: normalized to the 50th percentile; per gene: normalize to median	GPL570	1	entorhinal cortex_male_AD	Homo sapiens	85	entorhinal cortex	II		male	no info	3,4
GSM1176207	entorhinal cortex_male_86_AD_92	RNA	post-mortem tissue	GC-RMA, using Genespring 7.3. data transformation: measurements <0.01 set to 0.01; per chip: normalized to the 50th percentile; per gene: normalize to median	GPL570	1	entorhinal cortex_male_AD	Homo sapiens	86	entorhinal cortex	IV		male	19	3,3
GSM1176208	entorhinal cortex_male_87_AD_19	RNA	post-mortem tissue	GC-RMA, using Genespring 7.3. data transformation: measurements <0.01 set to 0.01; per chip: normalized to the 50th percentile; per gene: normalize to median	GPL570	1	entorhinal cortex_male_AD	Homo sapiens	87	entorhinal cortex	V		male	12	3,4
GSM1176209	entorhinal cortex_male_94_AD_5	RNA	post-mortem tissue	GC-RMA, using Genespring 7.3. data transformation: measurements <0.01 set to 0.01; per chip: normalized to the 50th percentile; per gene: normalize to median	GPL570	1	entorhinal cortex_male_AD	Homo sapiens	94	entorhinal cortex	VI		male	15	3,3
GSM1176210	entorhinal cortex_male_94_AD_90	RNA	post-mortem tissue	GC-RMA, using Genespring 7.3. data transformation: measurements <0.01 set to 0.01; per chip: normalized to the 50th percentile; per gene: normalize to median	GPL570	1	entorhinal cortex_male_AD	Homo sapiens	94	entorhinal cortex	IV		male	no info	3,3
GSM1176211	hippocampus_female_60_AD_20	RNA	post-mortem tissue	GC-RMA, using Genespring 7.3. data transformation: measurements <0.01 set to 0.01; per chip: normalized to the 50th percentile; per gene: normalize to median	GPL570	1	hippocampus_female_AD	Homo sapiens	60	hippocampus	VI		female	12	3,4
GSM1176212	hippocampus_female_74_AD_37	RNA	post-mortem tissue	GC-RMA, using Genespring 7.3. data transformation: measurements <0.01 set to 0.01; per chip: normalized to the 50th percentile; per gene: normalize to median	GPL570	1	hippocampus_female_AD	Homo sapiens	74	hippocampus	VI		female	17	2,4
GSM1176213	hippocampus_female_76_AD_48	RNA	post-mortem tissue	GC-RMA, using Genespring 7.3. data transformation: measurements <0.01 set to 0.01; per chip: normalized to the 50th percentile; per gene: normalize to median	GPL570	1	hippocampus_female_AD	Homo sapiens	76	hippocampus	V		female	3	3,3
GSM1176214	hippocampus_female_79_AD_16	RNA	post-mortem tissue	GC-RMA, using Genespring 7.3. data transformation: measurements <0.01 set to 0.01; per chip: normalized to the 50th percentile; per gene: normalize to median	GPL570	1	hippocampus_female_AD	Homo sapiens	79	hippocampus	VI		female	0	3,4
GSM1176215	hippocampus_female_86_AD_15	RNA	post-mortem tissue	GC-RMA, using Genespring 7.3. data transformation: measurements <0.01 set to 0.01; per chip: normalized to the 50th percentile; per gene: normalize to median	GPL570	1	hippocampus_female_AD	Homo sapiens	86	hippocampus	VI		female	9	4,4
GSM1176216	hippocampus_female_85_AD_24	RNA	post-mortem tissue	GC-RMA, using Genespring 7.3. data transformation: measurements <0.01 set to 0.01; per chip: normalized to the 50th percentile; per gene: normalize to median	GPL570	1	hippocampus_female_AD	Homo sapiens	85	hippocampus	IV		female	26	3,4
GSM1176217	hippocampus_female_90_AD_23	RNA	post-mortem tissue	GC-RMA, using Genespring 7.3. data transformation: measurements <0.01 set to 0.01; per chip: normalized to the 50th percentile; per gene: normalize to median	GPL570	1	hippocampus_female_AD	Homo sapiens	90	hippocampus	VI		female	12	3,4
GSM1176218	hippocampus_female_90_AD_36	RNA	post-mortem tissue	GC-RMA, using Genespring 7.3. data transformation: measurements <0.01 set to 0.01; per chip: normalized to the 50th percentile; per gene: normalize to median	GPL570	1	hippocampus_female_AD	Homo sapiens	90	hippocampus	IV		female	17	3,4
GSM1176219	hippocampus_female_90_AD_75	RNA	post-mortem tissue	GC-RMA, using Genespring 7.3. data transformation: measurements <0.01 set to 0.01; per chip: normalized to the 50th percentile; per gene: normalize to median	GPL570	1	hippocampus_female_AD	Homo sapiens	90	hippocampus	III		female	no info	4,4
GSM1176220	hippocampus_female_91_AD_11	RNA	post-mortem tissue	GC-RMA, using Genespring 7.3. data transformation: measurements <0.01 set to 0.01; per chip: normalized to the 50th percentile; per gene: normalize to median	GPL570	1	hippocampus_female_AD	Homo sapiens	91	hippocampus	V-VI		female	11	4,4
GSM1176221	hippocampus_male_76_AD_33	RNA	post-mortem tissue	GC-RMA, using Genespring 7.3. data transformation: measurements <0.01 set to 0.01; per chip: normalized to the 50th percentile; per gene: normalize to median	GPL570	1	hippocampus_male_AD	Homo sapiens	76	hippocampus	V		male	0	4,4
GSM1176222	hippocampus_male_76_AD_69	RNA	post-mortem tissue	GC-RMA, using Genespring 7.3. data transformation: measurements <0.01 set to 0.01; per chip: normalized to the 50th percentile; per gene: normalize to median	GPL570	1	hippocampus_male_AD	Homo sapiens	76	hippocampus	III		male	no info	4,4
GSM1176223	hippocampus_male_79_AD_7	RNA	post-mortem tissue	GC-RMA, using Genespring 7.3. data transformation: measurements <0.01 set to 0.01; per chip: normalized to the 50th percentile; per gene: normalize to median	GPL570	1	hippocampus_male_AD	Homo sapiens	79	hippocampus	VI		male	6	3,4
GSM1176224	hippocampus_male_80_AD_43	RNA	post-mortem tissue	GC-RMA, using Genespring 7.3. data transformation: measurements <0.01 set to 0.01; per chip: normalized to the 50th percentile; per gene: normalize to median	GPL570	1	hippocampus_male_AD	Homo sapiens	80	hippocampus	no info		male	23	3,3
GSM1176225	hippocampus_male_85_AD_51	RNA	post-mortem tissue	GC-RMA, using Genespring 7.3. data transformation: measurements <0.01 set to 0.01; per chip: normalized to the 50th percentile; per gene: normalize to median	GPL570	1	hippocampus_male_AD	Homo sapiens	85	hippocampus	III		male	22	3,3
GSM1176226	hippocampus_male_86_AD_92	RNA	post-mortem tissue	GC-RMA, using Genespring 7.3. data transformation: measurements <0.01 set to 0.01; per chip: normalized to the 50th percentile; per gene: normalize to median	GPL570	1	hippocampus_male_AD	Homo sapiens	86	hippocampus	IV		male	19	3,3
GSM1176227	hippocampus_male_87_AD_19	RNA	post-mortem tissue	GC-RMA, using Genespring 7.3. data transformation: measurements <0.01 set to 0.01; per chip: normalized to the 50th percentile; per gene: normalize to median	GPL570	1	hippocampus_male_AD	Homo sapiens	87	hippocampus	V		male	12	3,4
GSM1176228	hippocampus_male_94_AD_5	RNA	post-mortem tissue	GC-RMA, using Genespring 7.3. data transformation: measurements <0.01 set to 0.01; per chip: normalized to the 50th percentile; per gene: normalize to median	GPL570	1	hippocampus_male_AD	Homo sapiens	94	hippocampus	VI		male	15	3,3
GSM1176229	hippocampus_male_94_AD_90	RNA	post-mortem tissue	GC-RMA, using Genespring 7.3. data transformation: measurements <0.01 set to 0.01; per chip: normalized to the 50th percentile; per gene: normalize to median	GPL570	1	hippocampus_male_AD	Homo sapiens	94	hippocampus	IV		male	no info	3,3
GSM1176230	post-central gyrus_female_60_AD_20	RNA	post-mortem tissue	GC-RMA, using Genespring 7.3. data transformation: measurements <0.01 set to 0.01; per chip: normalized to the 50th percentile; per gene: normalize to median	GPL570	1	post-central gyrus_female_AD	Homo sapiens	60	post-central gyrus	VI		female	12	3,4
GSM1176231	post-central gyrus_female_74_AD_37	RNA	post-mortem tissue	GC-RMA, using Genespring 7.3. data transformation: measurements <0.01 set to 0.01; per chip: normalized to the 50th percentile; per gene: normalize to median	GPL570	1	post-central gyrus_female_AD	Homo sapiens	74	post-central gyrus	VI		female	17	2,4
GSM1176232	post-central gyrus_female_76_AD_48	RNA	post-mortem tissue	GC-RMA, using Genespring 7.3. data transformation: measurements <0.01 set to 0.01; per chip: normalized to the 50th percentile; per gene: normalize to median	GPL570	1	post-central gyrus_female_AD	Homo sapiens	76	post-central gyrus	V		female	3	3,3
GSM1176233	post-central gyrus_female_86_AD_15	RNA	post-mortem tissue	GC-RMA, using Genespring 7.3. data transformation: measurements <0.01 set to 0.01; per chip: normalized to the 50th percentile; per gene: normalize to median	GPL570	1	post-central gyrus_female_AD	Homo sapiens	86	post-central gyrus	VI		female	9	4,4
GSM1176234	post-central gyrus_female_82_AD_13	RNA	post-mortem tissue	GC-RMA, using Genespring 7.3. data transformation: measurements <0.01 set to 0.01; per chip: normalized to the 50th percentile; per gene: normalize to median	GPL570	1	post-central gyrus_female_AD	Homo sapiens	82	post-central gyrus	VI		female	4	3,4
GSM1176235	post-central gyrus_female_82_AD_9	RNA	post-mortem tissue	GC-RMA, using Genespring 7.3. data transformation: measurements <0.01 set to 0.01; per chip: normalized to the 50th percentile; per gene: normalize to median	GPL570	1	post-central gyrus_female_AD	Homo sapiens	82	post-central gyrus	VI		female	0	3,4
GSM1176236	post-central gyrus_female_85_AD_24	RNA	post-mortem tissue	GC-RMA, using Genespring 7.3. data transformation: measurements <0.01 set to 0.01; per chip: normalized to the 50th percentile; per gene: normalize to median	GPL570	1	post-central gyrus_female_AD	Homo sapiens	85	post-central gyrus	IV		female	26	3,4
GSM1176237	post-central gyrus_female_85_AD_57	RNA	post-mortem tissue	GC-RMA, using Genespring 7.3. data transformation: measurements <0.01 set to 0.01; per chip: normalized to the 50th percentile; per gene: normalize to median	GPL570	1	post-central gyrus_female_AD	Homo sapiens	85	post-central gyrus	V		female	no info	3,3
GSM1176238	post-central gyrus_female_90_AD_23	RNA	post-mortem tissue	GC-RMA, using Genespring 7.3. data transformation: measurements <0.01 set to 0.01; per chip: normalized to the 50th percentile; per gene: normalize to median	GPL570	1	post-central gyrus_female_AD	Homo sapiens	90	post-central gyrus	VI		female	12	3,4
GSM1176239	post-central gyrus_female_90_AD_36	RNA	post-mortem tissue	GC-RMA, using Genespring 7.3. data transformation: measurements <0.01 set to 0.01; per chip: normalized to the 50th percentile; per gene: normalize to median	GPL570	1	post-central gyrus_female_AD	Homo sapiens	90	post-central gyrus	IV		female	17	3,4
GSM1176240	post-central gyrus_female_90_AD_6	RNA	post-mortem tissue	GC-RMA, using Genespring 7.3. data transformation: measurements <0.01 set to 0.01; per chip: normalized to the 50th percentile; per gene: normalize to median	GPL570	1	post-central gyrus_female_AD	Homo sapiens	90	post-central gyrus	V		female	20	3,4
GSM1176241	post-central gyrus_female_90_AD_75	RNA	post-mortem tissue	GC-RMA, using Genespring 7.3. data transformation: measurements <0.01 set to 0.01; per chip: normalized to the 50th percentile; per gene: normalize to median	GPL570	1	post-central gyrus_female_AD	Homo sapiens	90	post-central gyrus	III		female	no info	4,4
GSM1176242	post-central gyrus_female_91_AD_11	RNA	post-mortem tissue	GC-RMA, using Genespring 7.3. data transformation: measurements <0.01 set to 0.01; per chip: normalized to the 50th percentile; per gene: normalize to median	GPL570	1	post-central gyrus_female_AD	Homo sapiens	91	post-central gyrus	V-VI		female	11	4,4
GSM1176243	post-central gyrus_female_94_AD_70	RNA	post-mortem tissue	GC-RMA, using Genespring 7.3. data transformation: measurements <0.01 set to 0.01; per chip: normalized to the 50th percentile; per gene: normalize to median	GPL570	1	post-central gyrus_female_AD	Homo sapiens	94	post-central gyrus	I		female	no info	3,3
GSM1176244	post-central gyrus_female_95_AD_64	RNA	post-mortem tissue	GC-RMA, using Genespring 7.3. data transformation: measurements <0.01 set to 0.01; per chip: normalized to the 50th percentile; per gene: normalize to median	GPL570	1	post-central gyrus_female_AD	Homo sapiens	95	post-central gyrus	no info		female	no info	3,3
GSM1176245	post-central gyrus_male_76_AD_33	RNA	post-mortem tissue	GC-RMA, using Genespring 7.3. data transformation: measurements <0.01 set to 0.01; per chip: normalized to the 50th percentile; per gene: normalize to median	GPL570	1	post-central gyrus_male_AD	Homo sapiens	76	post-central gyrus	V		male	0	4,4
GSM1176246	post-central gyrus_male_76_AD_69	RNA	post-mortem tissue	GC-RMA, using Genespring 7.3. data transformation: measurements <0.01 set to 0.01; per chip: normalized to the 50th percentile; per gene: normalize to median	GPL570	1	post-central gyrus_male_AD	Homo sapiens	76	post-central gyrus	III		male	no info	4,4
GSM1176247	post-central gyrus_male_79_AD_7	RNA	post-mortem tissue	GC-RMA, using Genespring 7.3. data transformation: measurements <0.01 set to 0.01; per chip: normalized to the 50th percentile; per gene: normalize to median	GPL570	1	post-central gyrus_male_AD	Homo sapiens	79	post-central gyrus	VI		male	6	3,4
GSM1176248	post-central gyrus_male_85_AD_51	RNA	post-mortem tissue	GC-RMA, using Genespring 7.3. data transformation: measurements <0.01 set to 0.01; per chip: normalized to the 50th percentile; per gene: normalize to median	GPL570	1	post-central gyrus_male_AD	Homo sapiens	85	post-central gyrus	III		male	22	3,3
GSM1176249	post-central gyrus_male_85_AD_74	RNA	post-mortem tissue	GC-RMA, using Genespring 7.3. data transformation: measurements <0.01 set to 0.01; per chip: normalized to the 50th percentile; per gene: normalize to median	GPL570	1	post-central gyrus_male_AD	Homo sapiens	85	post-central gyrus	II		male	no info	3,4
GSM1176250	post-central gyrus_male_86_AD_92	RNA	post-mortem tissue	GC-RMA, using Genespring 7.3. data transformation: measurements <0.01 set to 0.01; per chip: normalized to the 50th percentile; per gene: normalize to median	GPL570	1	post-central gyrus_male_AD	Homo sapiens	86	post-central gyrus	IV		male	19	3,3
GSM1176251	post-central gyrus_male_87_AD_19	RNA	post-mortem tissue	GC-RMA, using Genespring 7.3. data transformation: measurements <0.01 set to 0.01; per chip: normalized to the 50th percentile; per gene: normalize to median	GPL570	1	post-central gyrus_male_AD	Homo sapiens	87	post-central gyrus	V		male	12	3,4
GSM1176252	post-central gyrus_male_94_AD_44	RNA	post-mortem tissue	GC-RMA, using Genespring 7.3. data transformation: measurements <0.01 set to 0.01; per chip: normalized to the 50th percentile; per gene: normalize to median	GPL570	1	post-central gyrus_male_AD	Homo sapiens	94	post-central gyrus	IV		male	18	3,4
GSM1176253	post-central gyrus_male_94_AD_5	RNA	post-mortem tissue	GC-RMA, using Genespring 7.3. data transformation: measurements <0.01 set to 0.01; per chip: normalized to the 50th percentile; per gene: normalize to median	GPL570	1	post-central gyrus_male_AD	Homo sapiens	94	post-central gyrus	VI		male	15	3,3
GSM1176254	post-central gyrus_male_94_AD_90	RNA	post-mortem tissue	GC-RMA, using Genespring 7.3. data transformation: measurements <0.01 set to 0.01; per chip: normalized to the 50th percentile; per gene: normalize to median	GPL570	1	post-central gyrus_male_AD	Homo sapiens	94	post-central gyrus	IV		male	no info	3,3
GSM1176255	superior frontal gyrus_female_74_AD_37	RNA	post-mortem tissue	GC-RMA, using Genespring 7.3. data transformation: measurements <0.01 set to 0.01; per chip: normalized to the 50th percentile; per gene: normalize to median	GPL570	1	superior frontal gyrus_female_AD	Homo sapiens	74	superior frontal gyrus	VI		female	17	2,4
GSM1176256	superior frontal gyrus_female_76_AD_48	RNA	post-mortem tissue	GC-RMA, using Genespring 7.3. data transformation: measurements <0.01 set to 0.01; per chip: normalized to the 50th percentile; per gene: normalize to median	GPL570	1	superior frontal gyrus_female_AD	Homo sapiens	76	superior frontal gyrus	V		female	3	3,3
GSM1176257	superior frontal gyrus_female_86_AD_15	RNA	post-mortem tissue	GC-RMA, using Genespring 7.3. data transformation: measurements <0.01 set to 0.01; per chip: normalized to the 50th percentile; per gene: normalize to median	GPL570	1	superior frontal gyrus_female_AD	Homo sapiens	86	superior frontal gyrus	VI		female	9	4,4
GSM1176258	superior frontal gyrus_female_82_AD_9	RNA	post-mortem tissue	GC-RMA, using Genespring 7.3. data transformation: measurements <0.01 set to 0.01; per chip: normalized to the 50th percentile; per gene: normalize to median	GPL570	1	superior frontal gyrus_female_AD	Homo sapiens	82	superior frontal gyrus	VI		female	0	3,4
GSM1176259	superior frontal gyrus_female_85_AD_24	RNA	post-mortem tissue	GC-RMA, using Genespring 7.3. data transformation: measurements <0.01 set to 0.01; per chip: normalized to the 50th percentile; per gene: normalize to median	GPL570	1	superior frontal gyrus_female_AD	Homo sapiens	85	superior frontal gyrus	IV		female	26	3,4
GSM1176260	superior frontal gyrus_female_85_AD_57	RNA	post-mortem tissue	GC-RMA, using Genespring 7.3. data transformation: measurements <0.01 set to 0.01; per chip: normalized to the 50th percentile; per gene: normalize to median	GPL570	1	superior frontal gyrus_female_AD	Homo sapiens	85	superior frontal gyrus	V		female	no info	3,3
GSM1176261	superior frontal gyrus_female_88_AD_91	RNA	post-mortem tissue	GC-RMA, using Genespring 7.3. data transformation: measurements <0.01 set to 0.01; per chip: normalized to the 50th percentile; per gene: normalize to median	GPL570	1	superior frontal gyrus_female_AD	Homo sapiens	88	superior frontal gyrus	IV		female	27	3,4
GSM1176262	superior frontal gyrus_female_90_AD_23	RNA	post-mortem tissue	GC-RMA, using Genespring 7.3. data transformation: measurements <0.01 set to 0.01; per chip: normalized to the 50th percentile; per gene: normalize to median	GPL570	1	superior frontal gyrus_female_AD	Homo sapiens	90	superior frontal gyrus	VI		female	12	3,4
GSM1176263	superior frontal gyrus_female_90_AD_36	RNA	post-mortem tissue	GC-RMA, using Genespring 7.3. data transformation: measurements <0.01 set to 0.01; per chip: normalized to the 50th percentile; per gene: normalize to median	GPL570	1	superior frontal gyrus_female_AD	Homo sapiens	90	superior frontal gyrus	IV		female	17	3,4
GSM1176264	superior frontal gyrus_female_90_AD_6	RNA	post-mortem tissue	GC-RMA, using Genespring 7.3. data transformation: measurements <0.01 set to 0.01; per chip: normalized to the 50th percentile; per gene: normalize to median	GPL570	1	superior frontal gyrus_female_AD	Homo sapiens	90	superior frontal gyrus	V		female	20	3,4
GSM1176265	superior frontal gyrus_female_90_AD_75	RNA	post-mortem tissue	GC-RMA, using Genespring 7.3. data transformation: measurements <0.01 set to 0.01; per chip: normalized to the 50th percentile; per gene: normalize to median	GPL570	1	superior frontal gyrus_female_AD	Homo sapiens	90	superior frontal gyrus	III		female	no info	4,4
GSM1176266	superior frontal gyrus_female_91_AD_11	RNA	post-mortem tissue	GC-RMA, using Genespring 7.3. data transformation: measurements <0.01 set to 0.01; per chip: normalized to the 50th percentile; per gene: normalize to median	GPL570	1	superior frontal gyrus_female_AD	Homo sapiens	91	superior frontal gyrus	V-VI		female	11	4,4
GSM1176267	superior frontal gyrus_female_94_AD_70	RNA	post-mortem tissue	GC-RMA, using Genespring 7.3. data transformation: measurements <0.01 set to 0.01; per chip: normalized to the 50th percentile; per gene: normalize to median	GPL570	1	superior frontal gyrus_female_AD	Homo sapiens	94	superior frontal gyrus	I		female	no info	3,3
GSM1176268	superior frontal gyrus_female_95_AD_64	RNA	post-mortem tissue	GC-RMA, using Genespring 7.3. data transformation: measurements <0.01 set to 0.01; per chip: normalized to the 50th percentile; per gene: normalize to median	GPL570	1	superior frontal gyrus_female_AD	Homo sapiens	95	superior frontal gyrus	no info		female	no info	3,3
GSM1176269	superior frontal gyrus_male_76_AD_33	RNA	post-mortem tissue	GC-RMA, using Genespring 7.3. data transformation: measurements <0.01 set to 0.01; per chip: normalized to the 50th percentile; per gene: normalize to median	GPL570	1	superior frontal gyrus_male_AD	Homo sapiens	76	superior frontal gyrus	V		male	0	4,4
GSM1176270	superior frontal gyrus_male_85_AD_51	RNA	post-mortem tissue	GC-RMA, using Genespring 7.3. data transformation: measurements <0.01 set to 0.01; per chip: normalized to the 50th percentile; per gene: normalize to median	GPL570	1	superior frontal gyrus_male_AD	Homo sapiens	85	superior frontal gyrus	III		male	22	3,3
GSM1176271	superior frontal gyrus_male_85_AD_74	RNA	post-mortem tissue	GC-RMA, using Genespring 7.3. data transformation: measurements <0.01 set to 0.01; per chip: normalized to the 50th percentile; per gene: normalize to median	GPL570	1	superior frontal gyrus_male_AD	Homo sapiens	85	superior frontal gyrus	II		male	no info	3,4
GSM1176272	superior frontal gyrus_male_86_AD_92	RNA	post-mortem tissue	GC-RMA, using Genespring 7.3. data transformation: measurements <0.01 set to 0.01; per chip: normalized to the 50th percentile; per gene: normalize to median	GPL570	1	superior frontal gyrus_male_AD	Homo sapiens	86	superior frontal gyrus	IV		male	19	3,3
GSM1176273	superior frontal gyrus_male_94_AD_44	RNA	post-mortem tissue	GC-RMA, using Genespring 7.3. data transformation: measurements <0.01 set to 0.01; per chip: normalized to the 50th percentile; per gene: normalize to median	GPL570	1	superior frontal gyrus_male_AD	Homo sapiens	94	superior frontal gyrus	IV		male	18	3,4
GSM1176274	superior frontal gyrus_male_94_AD_5	RNA	post-mortem tissue	GC-RMA, using Genespring 7.3. data transformation: measurements <0.01 set to 0.01; per chip: normalized to the 50th percentile; per gene: normalize to median	GPL570	1	superior frontal gyrus_male_AD	Homo sapiens	94	superior frontal gyrus	VI		male	15	3,3
GSM1176275	superior frontal gyrus_male_94_AD_90	RNA	post-mortem tissue	GC-RMA, using Genespring 7.3. data transformation: measurements <0.01 set to 0.01; per chip: normalized to the 50th percentile; per gene: normalize to median	GPL570	1	superior frontal gyrus_male_AD	Homo sapiens	94	superior frontal gyrus	IV		male	no info	3,3

## Sheet: GSE11882
Accession	Title	SampleType	Description	DataProcessing	PlatformRef	ChannelCount	Source	Organism	brain region	individual	gender	age (yrs)
GSM300166	PostcentralGyrus_female_91yrs_indiv10	RNA	Brain from cognitively intact individual.	GC-RMA expression values were obtained from CEL files using GeneSpring 7.3.1 software. PLIER expression values were obtained using Expression Console software using default settings. PLIER and GC-RMA data were processed using GeneSpring 7.0 software, with default normalizations (Data transformation:set values<0.01 to 0.01; per chip: normalize to 50th percentile; per gene: normalize to median).	GPL570	1	brain, postcentral gyrus, female, 91 years	Homo sapiens	postcentral gyrus	10, C	female	91
GSM300167	SuperiorFrontalGyrus_female_91yrs_indiv10	RNA	Brain from cognitively intact individual.	GC-RMA expression values were obtained from CEL files using GeneSpring 7.3.1 software. PLIER expression values were obtained using Expression Console software using default settings. PLIER and GC-RMA data were processed using GeneSpring 7.0 software, with default normalizations (Data transformation:set values<0.01 to 0.01; per chip: normalize to 50th percentile; per gene: normalize to median).	GPL570	1	brain, superior frontal gyrus, female, 91 years	Homo sapiens	superior frontal gyrus	10, C	female	91
GSM300168	Hippocampus_female_96yrs_indiv105	RNA	Brain from cognitively intact individual.	GC-RMA expression values were obtained from CEL files using GeneSpring 7.3.1 software. PLIER expression values were obtained using Expression Console software using default settings. PLIER and GC-RMA data were processed using GeneSpring 7.0 software, with default normalizations (Data transformation:set values<0.01 to 0.01; per chip: normalize to 50th percentile; per gene: normalize to median).	GPL570	1	brain, hippocampus, female, 96 years	Homo sapiens	hippocampus	105, C	female	96
GSM300169	Hippocampus_male_82yrs_indiv106	RNA	Brain from cognitively intact individual.	GC-RMA expression values were obtained from CEL files using GeneSpring 7.3.1 software. PLIER expression values were obtained using Expression Console software using default settings. PLIER and GC-RMA data were processed using GeneSpring 7.0 software, with default normalizations (Data transformation:set values<0.01 to 0.01; per chip: normalize to 50th percentile; per gene: normalize to median).	GPL570	1	brain, hippocampus, male, 82 years	Homo sapiens	hippocampus	106, C	male	82
GSM300170	Hippocampus_male_84yrs_indiv108	RNA	Brain from cognitively intact individual.	GC-RMA expression values were obtained from CEL files using GeneSpring 7.3.1 software. PLIER expression values were obtained using Expression Console software using default settings. PLIER and GC-RMA data were processed using GeneSpring 7.0 software, with default normalizations (Data transformation:set values<0.01 to 0.01; per chip: normalize to 50th percentile; per gene: normalize to median).	GPL570	1	brain, hippocampus, male, 84 years	Homo sapiens	hippocampus	108, C	male	84
GSM300171	Hippocampus_female_87yrs_indiv109	RNA	Brain from cognitively intact individual.	GC-RMA expression values were obtained from CEL files using GeneSpring 7.3.1 software. PLIER expression values were obtained using Expression Console software using default settings. PLIER and GC-RMA data were processed using GeneSpring 7.0 software, with default normalizations (Data transformation:set values<0.01 to 0.01; per chip: normalize to 50th percentile; per gene: normalize to median).	GPL570	1	brain, hippocampus, female, 87 years	Homo sapiens	hippocampus	109, C	female	87
GSM300172	Hippocampus_female_82yrs_indiv111	RNA	Brain from cognitively intact individual.	GC-RMA expression values were obtained from CEL files using GeneSpring 7.3.1 software. PLIER expression values were obtained using Expression Console software using default settings. PLIER and GC-RMA data were processed using GeneSpring 7.0 software, with default normalizations (Data transformation:set values<0.01 to 0.01; per chip: normalize to 50th percentile; per gene: normalize to median).	GPL570	1	brain, hippocampus, female, 82 years	Homo sapiens	hippocampus	111, C	female	82
GSM300173	EntorhinalCortex_male_45yrs_indiv12	RNA	Brain from cognitively intact individual.	GC-RMA expression values were obtained from CEL files using GeneSpring 7.3.1 software. PLIER expression values were obtained using Expression Console software using default settings. PLIER and GC-RMA data were processed using GeneSpring 7.0 software, with default normalizations (Data transformation:set values<0.01 to 0.01; per chip: normalize to 50th percentile; per gene: normalize to median).	GPL570	1	brain, entorhinal cortex, male, 45 years	Homo sapiens	entorhinal cortex	12, AA	male	45
GSM300174	Hippocampus_male_45yrs_indiv12	RNA	Brain from cognitively intact individual.	GC-RMA expression values were obtained from CEL files using GeneSpring 7.3.1 software. PLIER expression values were obtained using Expression Console software using default settings. PLIER and GC-RMA data were processed using GeneSpring 7.0 software, with default normalizations (Data transformation:set values<0.01 to 0.01; per chip: normalize to 50th percentile; per gene: normalize to median).	GPL570	1	brain, hippocampus, male, 45 years	Homo sapiens	hippocampus	12, AA	male	45
GSM300175	PostcentralGyrus_male_45yrs_indiv12	RNA	Brain from cognitively intact individual.	GC-RMA expression values were obtained from CEL files using GeneSpring 7.3.1 software. PLIER expression values were obtained using Expression Console software using default settings. PLIER and GC-RMA data were processed using GeneSpring 7.0 software, with default normalizations (Data transformation:set values<0.01 to 0.01; per chip: normalize to 50th percentile; per gene: normalize to median).	GPL570	1	brain, postcentral gyrus, male, 45 years	Homo sapiens	postcentral gyrus	12, AA	male	45
GSM300176	SuperiorFrontalGyrus_male_45yrs_indiv12	RNA	Brain from cognitively intact individual.	GC-RMA expression values were obtained from CEL files using GeneSpring 7.3.1 software. PLIER expression values were obtained using Expression Console software using default settings. PLIER and GC-RMA data were processed using GeneSpring 7.0 software, with default normalizations (Data transformation:set values<0.01 to 0.01; per chip: normalize to 50th percentile; per gene: normalize to median).	GPL570	1	brain, superior frontal gyrus, male, 45 years	Homo sapiens	superior frontal gyrus	12, AA	male	45
GSM300177	EntorhinalCortex_male_95yrs_indiv14	RNA	Brain from cognitively intact individual.	GC-RMA expression values were obtained from CEL files using GeneSpring 7.3.1 software. PLIER expression values were obtained using Expression Console software using default settings. PLIER and GC-RMA data were processed using GeneSpring 7.0 software, with default normalizations (Data transformation:set values<0.01 to 0.01; per chip: normalize to 50th percentile; per gene: normalize to median).	GPL570	1	brain, entorhinal cortex, male, 95 years	Homo sapiens	entorhinal cortex	14, C	male	95
GSM300178	Hippocampus_male_95yrs_indiv14	RNA	Brain from cognitively intact individual.	GC-RMA expression values were obtained from CEL files using GeneSpring 7.3.1 software. PLIER expression values were obtained using Expression Console software using default settings. PLIER and GC-RMA data were processed using GeneSpring 7.0 software, with default normalizations (Data transformation:set values<0.01 to 0.01; per chip: normalize to 50th percentile; per gene: normalize to median).	GPL570	1	brain, hippocampus, male, 95 years	Homo sapiens	hippocampus	14, C	male	95
GSM300179	PostcentralGyrus_male_95yrs_indiv14	RNA	Brain from cognitively intact individual.	GC-RMA expression values were obtained from CEL files using GeneSpring 7.3.1 software. PLIER expression values were obtained using Expression Console software using default settings. PLIER and GC-RMA data were processed using GeneSpring 7.0 software, with default normalizations (Data transformation:set values<0.01 to 0.01; per chip: normalize to 50th percentile; per gene: normalize to median).	GPL570	1	brain, postcentral gyrus, male, 95 years	Homo sapiens	postcentral gyrus	14, C	male	95
GSM300180	SuperiorFrontalGyrus_male_95yrs_indiv14	RNA	Brain from cognitively intact individual.	GC-RMA expression values were obtained from CEL files using GeneSpring 7.3.1 software. PLIER expression values were obtained using Expression Console software using default settings. PLIER and GC-RMA data were processed using GeneSpring 7.0 software, with default normalizations (Data transformation:set values<0.01 to 0.01; per chip: normalize to 50th percentile; per gene: normalize to median).	GPL570	1	brain, superior frontal gyrus, male, 95 years	Homo sapiens	superior frontal gyrus	14, C	male	95
GSM300181	EntorhinalCortex_male_80yrs_indiv15	RNA	Brain from cognitively intact individual.	GC-RMA expression values were obtained from CEL files using GeneSpring 7.3.1 software. PLIER expression values were obtained using Expression Console software using default settings. PLIER and GC-RMA data were processed using GeneSpring 7.0 software, with default normalizations (Data transformation:set values<0.01 to 0.01; per chip: normalize to 50th percentile; per gene: normalize to median).	GPL570	1	brain, entorhinal cortex, male, 80 years	Homo sapiens	entorhinal cortex	15, C	male	80
GSM300182	Hippocampus_male_80yrs_indiv15	RNA	Brain from cognitively intact individual.	GC-RMA expression values were obtained from CEL files using GeneSpring 7.3.1 software. PLIER expression values were obtained using Expression Console software using default settings. PLIER and GC-RMA data were processed using GeneSpring 7.0 software, with default normalizations (Data transformation:set values<0.01 to 0.01; per chip: normalize to 50th percentile; per gene: normalize to median).	GPL570	1	brain, hippocampus, male, 80 years	Homo sapiens	hippocampus	15, C	male	80
GSM300183	PostcentralGyrus_male_80yrs_indiv15	RNA	Brain from cognitively intact individual.	GC-RMA expression values were obtained from CEL files using GeneSpring 7.3.1 software. PLIER expression values were obtained using Expression Console software using default settings. PLIER and GC-RMA data were processed using GeneSpring 7.0 software, with default normalizations (Data transformation:set values<0.01 to 0.01; per chip: normalize to 50th percentile; per gene: normalize to median).	GPL570	1	brain, postcentral gyrus, male, 80 years	Homo sapiens	postcentral gyrus	15, C	male	80
GSM300185	Hippocampus_male_91yrs_indiv16-07	RNA	Brain from cognitively intact individual.	GC-RMA expression values were obtained from CEL files using GeneSpring 7.3.1 software. PLIER expression values were obtained using Expression Console software using default settings. PLIER and GC-RMA data were processed using GeneSpring 7.0 software, with default normalizations (Data transformation:set values<0.01 to 0.01; per chip: normalize to 50th percentile; per gene: normalize to median).	GPL570	1	brain, hippocampus, male, 91 years	Homo sapiens	hippocampus	16-07, C	male	91
GSM300186	EntorhinalCortex_female_45yrs_indiv17	RNA	Brain from cognitively intact individual.	GC-RMA expression values were obtained from CEL files using GeneSpring 7.3.1 software. PLIER expression values were obtained using Expression Console software using default settings. PLIER and GC-RMA data were processed using GeneSpring 7.0 software, with default normalizations (Data transformation:set values<0.01 to 0.01; per chip: normalize to 50th percentile; per gene: normalize to median).	GPL570	1	brain, entorhinal cortex, female, 45 years	Homo sapiens	entorhinal cortex	17, C	female	45
GSM300187	Hippocampus_female_45yrs_indiv17	RNA	Brain from cognitively intact individual.	GC-RMA expression values were obtained from CEL files using GeneSpring 7.3.1 software. PLIER expression values were obtained using Expression Console software using default settings. PLIER and GC-RMA data were processed using GeneSpring 7.0 software, with default normalizations (Data transformation:set values<0.01 to 0.01; per chip: normalize to 50th percentile; per gene: normalize to median).	GPL570	1	brain, hippocampus, female, 45 years	Homo sapiens	hippocampus	17, C	female	45
GSM300188	SuperiorFrontalGyrus_female_45yrs_indiv17	RNA	Brain from cognitively intact individual.	GC-RMA expression values were obtained from CEL files using GeneSpring 7.3.1 software. PLIER expression values were obtained using Expression Console software using default settings. PLIER and GC-RMA data were processed using GeneSpring 7.0 software, with default normalizations (Data transformation:set values<0.01 to 0.01; per chip: normalize to 50th percentile; per gene: normalize to median).	GPL570	1	brain, superior frontal gyrus, female, 45 years	Homo sapiens	superior frontal gyrus	17, C	female	45
GSM300189	EntorhinalCortex_female_74yrs_indiv18	RNA	Brain from cognitively intact individual.	GC-RMA expression values were obtained from CEL files using GeneSpring 7.3.1 software. PLIER expression values were obtained using Expression Console software using default settings. PLIER and GC-RMA data were processed using GeneSpring 7.0 software, with default normalizations (Data transformation:set values<0.01 to 0.01; per chip: normalize to 50th percentile; per gene: normalize to median).	GPL570	1	brain, entorhinal cortex, female, 74 years	Homo sapiens	entorhinal cortex	18, C	female	74
GSM300190	Hippocampus_female_74yrs_indiv18	RNA	Brain from cognitively intact individual.	GC-RMA expression values were obtained from CEL files using GeneSpring 7.3.1 software. PLIER expression values were obtained using Expression Console software using default settings. PLIER and GC-RMA data were processed using GeneSpring 7.0 software, with default normalizations (Data transformation:set values<0.01 to 0.01; per chip: normalize to 50th percentile; per gene: normalize to median).	GPL570	1	brain, hippocampus, female, 74 years	Homo sapiens	hippocampus	18, C	female	74
GSM300191	SuperiorFrontalGyrus_female_74yrs_indiv18	RNA	Brain from cognitively intact individual.	GC-RMA expression values were obtained from CEL files using GeneSpring 7.3.1 software. PLIER expression values were obtained using Expression Console software using default settings. PLIER and GC-RMA data were processed using GeneSpring 7.0 software, with default normalizations (Data transformation:set values<0.01 to 0.01; per chip: normalize to 50th percentile; per gene: normalize to median).	GPL570	1	brain, superior frontal gyrus, female, 74 years	Homo sapiens	superior frontal gyrus	18, C	female	74
GSM300192	EntorhinalCortex_female_99yrs_indiv2	RNA	Brain from cognitively intact individual.	GC-RMA expression values were obtained from CEL files using GeneSpring 7.3.1 software. PLIER expression values were obtained using Expression Console software using default settings. PLIER and GC-RMA data were processed using GeneSpring 7.0 software, with default normalizations (Data transformation:set values<0.01 to 0.01; per chip: normalize to 50th percentile; per gene: normalize to median).	GPL570	1	brain, entorhinal cortex, female, 99 years	Homo sapiens	entorhinal cortex	2, C	female	99
GSM300193	Hippocampus_female_99yrs_indiv2	RNA	Brain from cognitively intact individual.	GC-RMA expression values were obtained from CEL files using GeneSpring 7.3.1 software. PLIER expression values were obtained using Expression Console software using default settings. PLIER and GC-RMA data were processed using GeneSpring 7.0 software, with default normalizations (Data transformation:set values<0.01 to 0.01; per chip: normalize to 50th percentile; per gene: normalize to median).	GPL570	1	brain, hippocampus, female, 99 years	Homo sapiens	hippocampus	2, C	female	99
GSM300194	PostcentralGyrus_female_99yrs_indiv2	RNA	Brain from cognitively intact individual.	GC-RMA expression values were obtained from CEL files using GeneSpring 7.3.1 software. PLIER expression values were obtained using Expression Console software using default settings. PLIER and GC-RMA data were processed using GeneSpring 7.0 software, with default normalizations (Data transformation:set values<0.01 to 0.01; per chip: normalize to 50th percentile; per gene: normalize to median).	GPL570	1	brain, postcentral gyrus, female, 99 years	Homo sapiens	postcentral gyrus	2, C	female	99
GSM300195	SuperiorFrontalGyrus_female_99yrs_indiv2	RNA	Brain from cognitively intact individual.	GC-RMA expression values were obtained from CEL files using GeneSpring 7.3.1 software. PLIER expression values were obtained using Expression Console software using default settings. PLIER and GC-RMA data were processed using GeneSpring 7.0 software, with default normalizations (Data transformation:set values<0.01 to 0.01; per chip: normalize to 50th percentile; per gene: normalize to median).	GPL570	1	brain, superior frontal gyrus, female, 99 years	Homo sapiens	superior frontal gyrus	2, C	female	99
GSM300196	EntorhinalCortex_female_74yrs_indiv21	RNA	Brain from cognitively intact individual.	GC-RMA expression values were obtained from CEL files using GeneSpring 7.3.1 software. PLIER expression values were obtained using Expression Console software using default settings. PLIER and GC-RMA data were processed using GeneSpring 7.0 software, with default normalizations (Data transformation:set values<0.01 to 0.01; per chip: normalize to 50th percentile; per gene: normalize to median).	GPL570	1	brain, entorhinal cortex, female, 74 years	Homo sapiens	entorhinal cortex	21, C	female	74
GSM300197	Hippocampus_female_74yrs_indiv21	RNA	Brain from cognitively intact individual.	GC-RMA expression values were obtained from CEL files using GeneSpring 7.3.1 software. PLIER expression values were obtained using Expression Console software using default settings. PLIER and GC-RMA data were processed using GeneSpring 7.0 software, with default normalizations (Data transformation:set values<0.01 to 0.01; per chip: normalize to 50th percentile; per gene: normalize to median).	GPL570	1	brain, hippocampus, female, 74 years	Homo sapiens	hippocampus	21, C	female	74
GSM300198	PostcentralGyrus_female_74yrs_indiv21	RNA	Brain from cognitively intact individual.	GC-RMA expression values were obtained from CEL files using GeneSpring 7.3.1 software. PLIER expression values were obtained using Expression Console software using default settings. PLIER and GC-RMA data were processed using GeneSpring 7.0 software, with default normalizations (Data transformation:set values<0.01 to 0.01; per chip: normalize to 50th percentile; per gene: normalize to median).	GPL570	1	brain, postcentral gyrus, female, 74 years	Homo sapiens	postcentral gyrus	21, C	female	74
GSM300199	SuperiorFrontalGyrus_female_74yrs_indiv21	RNA	Brain from cognitively intact individual.	GC-RMA expression values were obtained from CEL files using GeneSpring 7.3.1 software. PLIER expression values were obtained using Expression Console software using default settings. PLIER and GC-RMA data were processed using GeneSpring 7.0 software, with default normalizations (Data transformation:set values<0.01 to 0.01; per chip: normalize to 50th percentile; per gene: normalize to median).	GPL570	1	brain, superior frontal gyrus, female, 74 years	Homo sapiens	superior frontal gyrus	21, C	female	74
GSM300200	PostcentralGyrus_female_92yrs_indiv26	RNA	Brain from cognitively intact individual.	GC-RMA expression values were obtained from CEL files using GeneSpring 7.3.1 software. PLIER expression values were obtained using Expression Console software using default settings. PLIER and GC-RMA data were processed using GeneSpring 7.0 software, with default normalizations (Data transformation:set values<0.01 to 0.01; per chip: normalize to 50th percentile; per gene: normalize to median).	GPL570	1	brain, postcentral gyrus, female, 92 years	Homo sapiens	postcentral gyrus	26, C	female	92
GSM300201	SuperiorFrontalGyrus_female_92yrs_indiv26	RNA	Brain from cognitively intact individual.	GC-RMA expression values were obtained from CEL files using GeneSpring 7.3.1 software. PLIER expression values were obtained using Expression Console software using default settings. PLIER and GC-RMA data were processed using GeneSpring 7.0 software, with default normalizations (Data transformation:set values<0.01 to 0.01; per chip: normalize to 50th percentile; per gene: normalize to median).	GPL570	1	brain, superior frontal gyrus, female, 92 years	Homo sapiens	superior frontal gyrus	26, C	female	92
GSM300202	PostcentralGyrus_female_91yrs_indiv27	RNA	Brain from cognitively intact individual.	GC-RMA expression values were obtained from CEL files using GeneSpring 7.3.1 software. PLIER expression values were obtained using Expression Console software using default settings. PLIER and GC-RMA data were processed using GeneSpring 7.0 software, with default normalizations (Data transformation:set values<0.01 to 0.01; per chip: normalize to 50th percentile; per gene: normalize to median).	GPL570	1	brain, postcentral gyrus, female, 91 years	Homo sapiens	postcentral gyrus	27, C	female	91
GSM300203	SuperiorFrontalGyrus_female_91yrs_indiv27	RNA	Brain from cognitively intact individual.	GC-RMA expression values were obtained from CEL files using GeneSpring 7.3.1 software. PLIER expression values were obtained using Expression Console software using default settings. PLIER and GC-RMA data were processed using GeneSpring 7.0 software, with default normalizations (Data transformation:set values<0.01 to 0.01; per chip: normalize to 50th percentile; per gene: normalize to median).	GPL570	1	brain, superior frontal gyrus, female, 91 years	Homo sapiens	superior frontal gyrus	27, C	female	91
GSM300204	EntorhinalCortex_male_83yrs_indiv28	RNA	Brain from cognitively intact individual.	GC-RMA expression values were obtained from CEL files using GeneSpring 7.3.1 software. PLIER expression values were obtained using Expression Console software using default settings. PLIER and GC-RMA data were processed using GeneSpring 7.0 software, with default normalizations (Data transformation:set values<0.01 to 0.01; per chip: normalize to 50th percentile; per gene: normalize to median).	GPL570	1	brain, entorhinal cortex, male, 83 years	Homo sapiens	entorhinal cortex	28, C	male	83
GSM300205	Hippocampus_male_83yrs_indiv28	RNA	Brain from cognitively intact individual.	GC-RMA expression values were obtained from CEL files using GeneSpring 7.3.1 software. PLIER expression values were obtained using Expression Console software using default settings. PLIER and GC-RMA data were processed using GeneSpring 7.0 software, with default normalizations (Data transformation:set values<0.01 to 0.01; per chip: normalize to 50th percentile; per gene: normalize to median).	GPL570	1	brain, hippocampus, male, 83 years	Homo sapiens	hippocampus	28, C	male	83
GSM300206	PostcentralGyrus_male_83yrs_indiv28	RNA	Brain from cognitively intact individual.	GC-RMA expression values were obtained from CEL files using GeneSpring 7.3.1 software. PLIER expression values were obtained using Expression Console software using default settings. PLIER and GC-RMA data were processed using GeneSpring 7.0 software, with default normalizations (Data transformation:set values<0.01 to 0.01; per chip: normalize to 50th percentile; per gene: normalize to median).	GPL570	1	brain, postcentral gyrus, male, 83 years	Homo sapiens	postcentral gyrus	28, C	male	83
GSM300207	SuperiorFrontalGyrus_male_83yrs_indiv28	RNA	Brain from cognitively intact individual.	GC-RMA expression values were obtained from CEL files using GeneSpring 7.3.1 software. PLIER expression values were obtained using Expression Console software using default settings. PLIER and GC-RMA data were processed using GeneSpring 7.0 software, with default normalizations (Data transformation:set values<0.01 to 0.01; per chip: normalize to 50th percentile; per gene: normalize to median).	GPL570	1	brain, superior frontal gyrus, male, 83 years	Homo sapiens	superior frontal gyrus	28, C	male	83
GSM300208	EntorhinalCortex_male_28yrs_indiv29	RNA	Brain from cognitively intact individual.	GC-RMA expression values were obtained from CEL files using GeneSpring 7.3.1 software. PLIER expression values were obtained using Expression Console software using default settings. PLIER and GC-RMA data were processed using GeneSpring 7.0 software, with default normalizations (Data transformation:set values<0.01 to 0.01; per chip: normalize to 50th percentile; per gene: normalize to median).	GPL570	1	brain, entorhinal cortex, male, 28 years	Homo sapiens	entorhinal cortex	29, C	male	28
GSM300209	Hippocampus_male_28yrs_indiv29	RNA	Brain from cognitively intact individual.	GC-RMA expression values were obtained from CEL files using GeneSpring 7.3.1 software. PLIER expression values were obtained using Expression Console software using default settings. PLIER and GC-RMA data were processed using GeneSpring 7.0 software, with default normalizations (Data transformation:set values<0.01 to 0.01; per chip: normalize to 50th percentile; per gene: normalize to median).	GPL570	1	brain, hippocampus, male, 28 years	Homo sapiens	hippocampus	29, C	male	28
GSM300210	PostcentralGyrus_male_28yrs_indiv29	RNA	Brain from cognitively intact individual.	GC-RMA expression values were obtained from CEL files using GeneSpring 7.3.1 software. PLIER expression values were obtained using Expression Console software using default settings. PLIER and GC-RMA data were processed using GeneSpring 7.0 software, with default normalizations (Data transformation:set values<0.01 to 0.01; per chip: normalize to 50th percentile; per gene: normalize to median).	GPL570	1	brain, postcentral gyrus, male, 28 years	Homo sapiens	postcentral gyrus	29, C	male	28
GSM300211	SuperiorFrontalGyrus_male_28yrs_indiv29	RNA	Brain from cognitively intact individual.	GC-RMA expression values were obtained from CEL files using GeneSpring 7.3.1 software. PLIER expression values were obtained using Expression Console software using default settings. PLIER and GC-RMA data were processed using GeneSpring 7.0 software, with default normalizations (Data transformation:set values<0.01 to 0.01; per chip: normalize to 50th percentile; per gene: normalize to median).	GPL570	1	brain, superior frontal gyrus, male, 28 years	Homo sapiens	superior frontal gyrus	29, C	male	28
GSM300212	PostcentralGyrus_female_74yrs_indiv30	RNA	Brain from cognitively intact individual.	GC-RMA expression values were obtained from CEL files using GeneSpring 7.3.1 software. PLIER expression values were obtained using Expression Console software using default settings. PLIER and GC-RMA data were processed using GeneSpring 7.0 software, with default normalizations (Data transformation:set values<0.01 to 0.01; per chip: normalize to 50th percentile; per gene: normalize to median).	GPL570	1	brain, postcentral gyrus, female, 74 years	Homo sapiens	postcentral gyrus	30, C	female	74
GSM300213	SuperiorFrontalGyrus_female_74yrs_indiv30	RNA	Brain from cognitively intact individual.	GC-RMA expression values were obtained from CEL files using GeneSpring 7.3.1 software. PLIER expression values were obtained using Expression Console software using default settings. PLIER and GC-RMA data were processed using GeneSpring 7.0 software, with default normalizations (Data transformation:set values<0.01 to 0.01; per chip: normalize to 50th percentile; per gene: normalize to median).	GPL570	1	brain, superior frontal gyrus, female, 74 years	Homo sapiens	superior frontal gyrus	30, C	female	74
GSM300214	EntorhinalCortex_male_97yrs_indiv34	RNA	Brain from cognitively intact individual.	GC-RMA expression values were obtained from CEL files using GeneSpring 7.3.1 software. PLIER expression values were obtained using Expression Console software using default settings. PLIER and GC-RMA data were processed using GeneSpring 7.0 software, with default normalizations (Data transformation:set values<0.01 to 0.01; per chip: normalize to 50th percentile; per gene: normalize to median).	GPL570	1	brain, entorhinal cortex, male, 97 years	Homo sapiens	entorhinal cortex	34, C	male	97
GSM300215	Hippocampus_male_97yrs_indiv34	RNA	Brain from cognitively intact individual.	GC-RMA expression values were obtained from CEL files using GeneSpring 7.3.1 software. PLIER expression values were obtained using Expression Console software using default settings. PLIER and GC-RMA data were processed using GeneSpring 7.0 software, with default normalizations (Data transformation:set values<0.01 to 0.01; per chip: normalize to 50th percentile; per gene: normalize to median).	GPL570	1	brain, hippocampus, male, 97 years	Homo sapiens	hippocampus	34, C	male	97
GSM300216	PostcentralGyrus_male_97yrs_indiv34	RNA	Brain from cognitively intact individual.	GC-RMA expression values were obtained from CEL files using GeneSpring 7.3.1 software. PLIER expression values were obtained using Expression Console software using default settings. PLIER and GC-RMA data were processed using GeneSpring 7.0 software, with default normalizations (Data transformation:set values<0.01 to 0.01; per chip: normalize to 50th percentile; per gene: normalize to median).	GPL570	1	brain, postcentral gyrus, male, 97 years	Homo sapiens	postcentral gyrus	34, C	male	97
GSM300217	SuperiorFrontalGyrus_male_97yrs_indiv34	RNA	Brain from cognitively intact individual.	GC-RMA expression values were obtained from CEL files using GeneSpring 7.3.1 software. PLIER expression values were obtained using Expression Console software using default settings. PLIER and GC-RMA data were processed using GeneSpring 7.0 software, with default normalizations (Data transformation:set values<0.01 to 0.01; per chip: normalize to 50th percentile; per gene: normalize to median).	GPL570	1	brain, superior frontal gyrus, male, 97 years	Homo sapiens	superior frontal gyrus	34, C	male	97
GSM300218	EntorhinalCortex_female_34yrs_indiv35	RNA	Brain from cognitively intact individual.	GC-RMA expression values were obtained from CEL files using GeneSpring 7.3.1 software. PLIER expression values were obtained using Expression Console software using default settings. PLIER and GC-RMA data were processed using GeneSpring 7.0 software, with default normalizations (Data transformation:set values<0.01 to 0.01; per chip: normalize to 50th percentile; per gene: normalize to median).	GPL570	1	brain, entorhinal cortex, female, 34 years	Homo sapiens	entorhinal cortex	35, AA	female	34
GSM300219	Hippocampus_female_34yrs_indiv35	RNA	Brain from cognitively intact individual.	GC-RMA expression values were obtained from CEL files using GeneSpring 7.3.1 software. PLIER expression values were obtained using Expression Console software using default settings. PLIER and GC-RMA data were processed using GeneSpring 7.0 software, with default normalizations (Data transformation:set values<0.01 to 0.01; per chip: normalize to 50th percentile; per gene: normalize to median).	GPL570	1	brain, hippocampus, female, 34 years	Homo sapiens	hippocampus	35, AA	female	34
GSM300220	PostcentralGyrus_female_34yrs_indiv35	RNA	Brain from cognitively intact individual.	GC-RMA expression values were obtained from CEL files using GeneSpring 7.3.1 software. PLIER expression values were obtained using Expression Console software using default settings. PLIER and GC-RMA data were processed using GeneSpring 7.0 software, with default normalizations (Data transformation:set values<0.01 to 0.01; per chip: normalize to 50th percentile; per gene: normalize to median).	GPL570	1	brain, postcentral gyrus, female, 34 years	Homo sapiens	postcentral gyrus	35, AA	female	34
GSM300221	SuperiorFrontalGyrus_female_34yrs_indiv35	RNA	Brain from cognitively intact individual.	GC-RMA expression values were obtained from CEL files using GeneSpring 7.3.1 software. PLIER expression values were obtained using Expression Console software using default settings. PLIER and GC-RMA data were processed using GeneSpring 7.0 software, with default normalizations (Data transformation:set values<0.01 to 0.01; per chip: normalize to 50th percentile; per gene: normalize to median).	GPL570	1	brain, superior frontal gyrus, female, 34 years	Homo sapiens	superior frontal gyrus	35, AA	female	34
GSM300222	EntorhinalCortex_female_74yrs_indiv38	RNA	Brain from cognitively intact individual.	GC-RMA expression values were obtained from CEL files using GeneSpring 7.3.1 software. PLIER expression values were obtained using Expression Console software using default settings. PLIER and GC-RMA data were processed using GeneSpring 7.0 software, with default normalizations (Data transformation:set values<0.01 to 0.01; per chip: normalize to 50th percentile; per gene: normalize to median).	GPL570	1	brain, entorhinal cortex, female, 74 years	Homo sapiens	entorhinal cortex	38, C	female	74
GSM300223	Hippocampus_female_74yrs_indiv38	RNA	Brain from cognitively intact individual.	GC-RMA expression values were obtained from CEL files using GeneSpring 7.3.1 software. PLIER expression values were obtained using Expression Console software using default settings. PLIER and GC-RMA data were processed using GeneSpring 7.0 software, with default normalizations (Data transformation:set values<0.01 to 0.01; per chip: normalize to 50th percentile; per gene: normalize to median).	GPL570	1	brain, hippocampus, female, 74 years	Homo sapiens	hippocampus	38, C	female	74
GSM300224	PostcentralGyrus_female_74yrs_indiv38	RNA	Brain from cognitively intact individual.	GC-RMA expression values were obtained from CEL files using GeneSpring 7.3.1 software. PLIER expression values were obtained using Expression Console software using default settings. PLIER and GC-RMA data were processed using GeneSpring 7.0 software, with default normalizations (Data transformation:set values<0.01 to 0.01; per chip: normalize to 50th percentile; per gene: normalize to median).	GPL570	1	brain, postcentral gyrus, female, 74 years	Homo sapiens	postcentral gyrus	38, C	female	74
GSM300225	SuperiorFrontalGyrus_female_74yrs_indiv38	RNA	Brain from cognitively intact individual.	GC-RMA expression values were obtained from CEL files using GeneSpring 7.3.1 software. PLIER expression values were obtained using Expression Console software using default settings. PLIER and GC-RMA data were processed using GeneSpring 7.0 software, with default normalizations (Data transformation:set values<0.01 to 0.01; per chip: normalize to 50th percentile; per gene: normalize to median).	GPL570	1	brain, superior frontal gyrus, female, 74 years	Homo sapiens	superior frontal gyrus	38, C	female	74
GSM300226	PostcentralGyrus_female_90yrs_indiv40	RNA	Brain from cognitively intact individual.	GC-RMA expression values were obtained from CEL files using GeneSpring 7.3.1 software. PLIER expression values were obtained using Expression Console software using default settings. PLIER and GC-RMA data were processed using GeneSpring 7.0 software, with default normalizations (Data transformation:set values<0.01 to 0.01; per chip: normalize to 50th percentile; per gene: normalize to median).	GPL570	1	brain, postcentral gyrus, female, 90 years	Homo sapiens	postcentral gyrus	40, C	female	90
GSM300227	Hippocampus_female_91yrs_indiv40-04	RNA	Brain from cognitively intact individual.	GC-RMA expression values were obtained from CEL files using GeneSpring 7.3.1 software. PLIER expression values were obtained using Expression Console software using default settings. PLIER and GC-RMA data were processed using GeneSpring 7.0 software, with default normalizations (Data transformation:set values<0.01 to 0.01; per chip: normalize to 50th percentile; per gene: normalize to median).	GPL570	1	brain, hippocampus, female, 91 years	Homo sapiens	hippocampus	40-04, C	female	91
GSM300228	EntorhinalCortex_female_44yrs_indiv42	RNA	Brain from cognitively intact individual.	GC-RMA expression values were obtained from CEL files using GeneSpring 7.3.1 software. PLIER expression values were obtained using Expression Console software using default settings. PLIER and GC-RMA data were processed using GeneSpring 7.0 software, with default normalizations (Data transformation:set values<0.01 to 0.01; per chip: normalize to 50th percentile; per gene: normalize to median).	GPL570	1	brain, entorhinal cortex, female, 44 years	Homo sapiens	entorhinal cortex	42, C	female	44
GSM300229	SuperiorFrontalGyrus_female_44yrs_indiv42	RNA	Brain from cognitively intact individual.	GC-RMA expression values were obtained from CEL files using GeneSpring 7.3.1 software. PLIER expression values were obtained using Expression Console software using default settings. PLIER and GC-RMA data were processed using GeneSpring 7.0 software, with default normalizations (Data transformation:set values<0.01 to 0.01; per chip: normalize to 50th percentile; per gene: normalize to median).	GPL570	1	brain, superior frontal gyrus, female, 44 years	Homo sapiens	superior frontal gyrus	42, C	female	44
GSM300230	EntorhinalCortex_female_37yrs_indiv45	RNA	Brain from cognitively intact individual.	GC-RMA expression values were obtained from CEL files using GeneSpring 7.3.1 software. PLIER expression values were obtained using Expression Console software using default settings. PLIER and GC-RMA data were processed using GeneSpring 7.0 software, with default normalizations (Data transformation:set values<0.01 to 0.01; per chip: normalize to 50th percentile; per gene: normalize to median).	GPL570	1	brain, entorhinal cortex, female, 37 years	Homo sapiens	entorhinal cortex	45, C	female	37
GSM300231	Hippocampus_female_37yrs_indiv45	RNA	Brain from cognitively intact individual.	GC-RMA expression values were obtained from CEL files using GeneSpring 7.3.1 software. PLIER expression values were obtained using Expression Console software using default settings. PLIER and GC-RMA data were processed using GeneSpring 7.0 software, with default normalizations (Data transformation:set values<0.01 to 0.01; per chip: normalize to 50th percentile; per gene: normalize to median).	GPL570	1	brain, hippocampus, female, 37 years	Homo sapiens	hippocampus	45, C	female	37
GSM300232	PostcentralGyrus_female_37yrs_indiv45	RNA	Brain from cognitively intact individual.	GC-RMA expression values were obtained from CEL files using GeneSpring 7.3.1 software. PLIER expression values were obtained using Expression Console software using default settings. PLIER and GC-RMA data were processed using GeneSpring 7.0 software, with default normalizations (Data transformation:set values<0.01 to 0.01; per chip: normalize to 50th percentile; per gene: normalize to median).	GPL570	1	brain, postcentral gyrus, female, 37 years	Homo sapiens	postcentral gyrus	45, C	female	37
GSM300233	SuperiorFrontalGyrus_female_37yrs_indiv45	RNA	Brain from cognitively intact individual.	GC-RMA expression values were obtained from CEL files using GeneSpring 7.3.1 software. PLIER expression values were obtained using Expression Console software using default settings. PLIER and GC-RMA data were processed using GeneSpring 7.0 software, with default normalizations (Data transformation:set values<0.01 to 0.01; per chip: normalize to 50th percentile; per gene: normalize to median).	GPL570	1	brain, superior frontal gyrus, female, 37 years	Homo sapiens	superior frontal gyrus	45, C	female	37
GSM300234	EntorhinalCortex_male_85yrs_indiv46	RNA	Brain from cognitively intact individual.	GC-RMA expression values were obtained from CEL files using GeneSpring 7.3.1 software. PLIER expression values were obtained using Expression Console software using default settings. PLIER and GC-RMA data were processed using GeneSpring 7.0 software, with default normalizations (Data transformation:set values<0.01 to 0.01; per chip: normalize to 50th percentile; per gene: normalize to median).	GPL570	1	brain, entorhinal cortex, male, 85 years	Homo sapiens	entorhinal cortex	46, C	male	85
GSM300235	Hippocampus_male_85yrs_indiv46	RNA	Brain from cognitively intact individual.	GC-RMA expression values were obtained from CEL files using GeneSpring 7.3.1 software. PLIER expression values were obtained using Expression Console software using default settings. PLIER and GC-RMA data were processed using GeneSpring 7.0 software, with default normalizations (Data transformation:set values<0.01 to 0.01; per chip: normalize to 50th percentile; per gene: normalize to median).	GPL570	1	brain, hippocampus, male, 85 years	Homo sapiens	hippocampus	46, C	male	85
GSM300236	PostcentralGyrus_male_85yrs_indiv46	RNA	Brain from cognitively intact individual.	GC-RMA expression values were obtained from CEL files using GeneSpring 7.3.1 software. PLIER expression values were obtained using Expression Console software using default settings. PLIER and GC-RMA data were processed using GeneSpring 7.0 software, with default normalizations (Data transformation:set values<0.01 to 0.01; per chip: normalize to 50th percentile; per gene: normalize to median).	GPL570	1	brain, postcentral gyrus, male, 85 years	Homo sapiens	postcentral gyrus	46, C	male	85
GSM300237	SuperiorFrontalGyrus_male_85yrs_indiv46	RNA	Brain from cognitively intact individual.	GC-RMA expression values were obtained from CEL files using GeneSpring 7.3.1 software. PLIER expression values were obtained using Expression Console software using default settings. PLIER and GC-RMA data were processed using GeneSpring 7.0 software, with default normalizations (Data transformation:set values<0.01 to 0.01; per chip: normalize to 50th percentile; per gene: normalize to median).	GPL570	1	brain, superior frontal gyrus, male, 85 years	Homo sapiens	superior frontal gyrus	46, C	male	85
GSM300238	EntorhinalCortex_female_70yrs_indiv47	RNA	Brain from cognitively intact individual.	GC-RMA expression values were obtained from CEL files using GeneSpring 7.3.1 software. PLIER expression values were obtained using Expression Console software using default settings. PLIER and GC-RMA data were processed using GeneSpring 7.0 software, with default normalizations (Data transformation:set values<0.01 to 0.01; per chip: normalize to 50th percentile; per gene: normalize to median).	GPL570	1	brain, entorhinal cortex, female, 70 years	Homo sapiens	entorhinal cortex	47, C	female	70
GSM300239	Hippocampus_female_70yrs_indiv47	RNA	Brain from cognitively intact individual.	GC-RMA expression values were obtained from CEL files using GeneSpring 7.3.1 software. PLIER expression values were obtained using Expression Console software using default settings. PLIER and GC-RMA data were processed using GeneSpring 7.0 software, with default normalizations (Data transformation:set values<0.01 to 0.01; per chip: normalize to 50th percentile; per gene: normalize to median).	GPL570	1	brain, hippocampus, female, 70 years	Homo sapiens	hippocampus	47, C	female	70
GSM300240	PostcentralGyrus_female_70yrs_indiv47	RNA	Brain from cognitively intact individual.	GC-RMA expression values were obtained from CEL files using GeneSpring 7.3.1 software. PLIER expression values were obtained using Expression Console software using default settings. PLIER and GC-RMA data were processed using GeneSpring 7.0 software, with default normalizations (Data transformation:set values<0.01 to 0.01; per chip: normalize to 50th percentile; per gene: normalize to median).	GPL570	1	brain, postcentral gyrus, female, 70 years	Homo sapiens	postcentral gyrus	47, C	female	70
GSM300241	SuperiorFrontalGyrus_female_70yrs_indiv47	RNA	Brain from cognitively intact individual.	GC-RMA expression values were obtained from CEL files using GeneSpring 7.3.1 software. PLIER expression values were obtained using Expression Console software using default settings. PLIER and GC-RMA data were processed using GeneSpring 7.0 software, with default normalizations (Data transformation:set values<0.01 to 0.01; per chip: normalize to 50th percentile; per gene: normalize to median).	GPL570	1	brain, superior frontal gyrus, female, 70 years	Homo sapiens	superior frontal gyrus	47, C	female	70
GSM300242	EntorhinalCortex_female_64yrs_indiv52	RNA	Brain from cognitively intact individual.	GC-RMA expression values were obtained from CEL files using GeneSpring 7.3.1 software. PLIER expression values were obtained using Expression Console software using default settings. PLIER and GC-RMA data were processed using GeneSpring 7.0 software, with default normalizations (Data transformation:set values<0.01 to 0.01; per chip: normalize to 50th percentile; per gene: normalize to median).	GPL570	1	brain, entorhinal cortex, female, 64 years	Homo sapiens	entorhinal cortex	52, C	female	64
GSM300243	Hippocampus_female_64yrs_indiv52	RNA	Brain from cognitively intact individual.	GC-RMA expression values were obtained from CEL files using GeneSpring 7.3.1 software. PLIER expression values were obtained using Expression Console software using default settings. PLIER and GC-RMA data were processed using GeneSpring 7.0 software, with default normalizations (Data transformation:set values<0.01 to 0.01; per chip: normalize to 50th percentile; per gene: normalize to median).	GPL570	1	brain, hippocampus, female, 64 years	Homo sapiens	hippocampus	52, C	female	64
GSM300244	PostcentralGyrus_female_64yrs_indiv52	RNA	Brain from cognitively intact individual.	GC-RMA expression values were obtained from CEL files using GeneSpring 7.3.1 software. PLIER expression values were obtained using Expression Console software using default settings. PLIER and GC-RMA data were processed using GeneSpring 7.0 software, with default normalizations (Data transformation:set values<0.01 to 0.01; per chip: normalize to 50th percentile; per gene: normalize to median).	GPL570	1	brain, postcentral gyrus, female, 64 years	Homo sapiens	postcentral gyrus	52, C	female	64
GSM300245	SuperiorFrontalGyrus_female_64yrs_indiv52	RNA	Brain from cognitively intact individual.	GC-RMA expression values were obtained from CEL files using GeneSpring 7.3.1 software. PLIER expression values were obtained using Expression Console software using default settings. PLIER and GC-RMA data were processed using GeneSpring 7.0 software, with default normalizations (Data transformation:set values<0.01 to 0.01; per chip: normalize to 50th percentile; per gene: normalize to median).	GPL570	1	brain, superior frontal gyrus, female, 64 years	Homo sapiens	superior frontal gyrus	52, C	female	64
GSM300246	PostcentralGyrus_male_70yrs_indiv53	RNA	Brain from cognitively intact individual.	GC-RMA expression values were obtained from CEL files using GeneSpring 7.3.1 software. PLIER expression values were obtained using Expression Console software using default settings. PLIER and GC-RMA data were processed using GeneSpring 7.0 software, with default normalizations (Data transformation:set values<0.01 to 0.01; per chip: normalize to 50th percentile; per gene: normalize to median).	GPL570	1	brain, postcentral gyrus, male, 70 years	Homo sapiens	postcentral gyrus	53, C	male	70
GSM300247	SuperiorFrontalGyrus_male_70yrs_indiv53	RNA	Brain from cognitively intact individual.	GC-RMA expression values were obtained from CEL files using GeneSpring 7.3.1 software. PLIER expression values were obtained using Expression Console software using default settings. PLIER and GC-RMA data were processed using GeneSpring 7.0 software, with default normalizations (Data transformation:set values<0.01 to 0.01; per chip: normalize to 50th percentile; per gene: normalize to median).	GPL570	1	brain, superior frontal gyrus, male, 70 years	Homo sapiens	superior frontal gyrus	53, C	male	70
GSM300248	EntorhinalCortex_female_85yrs_indiv54	RNA	Brain from cognitively intact individual.	GC-RMA expression values were obtained from CEL files using GeneSpring 7.3.1 software. PLIER expression values were obtained using Expression Console software using default settings. PLIER and GC-RMA data were processed using GeneSpring 7.0 software, with default normalizations (Data transformation:set values<0.01 to 0.01; per chip: normalize to 50th percentile; per gene: normalize to median).	GPL570	1	brain, entorhinal cortex, female, 85 years	Homo sapiens	entorhinal cortex	54, C	female	85
GSM300249	PostcentralGyrus_female_85yrs_indiv54	RNA	Brain from cognitively intact individual.	GC-RMA expression values were obtained from CEL files using GeneSpring 7.3.1 software. PLIER expression values were obtained using Expression Console software using default settings. PLIER and GC-RMA data were processed using GeneSpring 7.0 software, with default normalizations (Data transformation:set values<0.01 to 0.01; per chip: normalize to 50th percentile; per gene: normalize to median).	GPL570	1	brain, postcentral gyrus, female, 85 years	Homo sapiens	postcentral gyrus	54, C	female	85
GSM300250	SuperiorFrontalGyrus_female_85yrs_indiv54	RNA	Brain from cognitively intact individual.	GC-RMA expression values were obtained from CEL files using GeneSpring 7.3.1 software. PLIER expression values were obtained using Expression Console software using default settings. PLIER and GC-RMA data were processed using GeneSpring 7.0 software, with default normalizations (Data transformation:set values<0.01 to 0.01; per chip: normalize to 50th percentile; per gene: normalize to median).	GPL570	1	brain, superior frontal gyrus, female, 85 years	Homo sapiens	superior frontal gyrus	54, C	female	85
GSM300251	SuperiorFrontalGyrus_female_91yrs_indiv59	RNA	Brain from cognitively intact individual.	GC-RMA expression values were obtained from CEL files using GeneSpring 7.3.1 software. PLIER expression values were obtained using Expression Console software using default settings. PLIER and GC-RMA data were processed using GeneSpring 7.0 software, with default normalizations (Data transformation:set values<0.01 to 0.01; per chip: normalize to 50th percentile; per gene: normalize to median).	GPL570	1	brain, superior frontal gyrus, female, 91 years	Homo sapiens	superior frontal gyrus	59, C	female	91
GSM300252	EntorhinalCortex_male_21yrs_indiv66	RNA	Brain from cognitively intact individual.	GC-RMA expression values were obtained from CEL files using GeneSpring 7.3.1 software. PLIER expression values were obtained using Expression Console software using default settings. PLIER and GC-RMA data were processed using GeneSpring 7.0 software, with default normalizations (Data transformation:set values<0.01 to 0.01; per chip: normalize to 50th percentile; per gene: normalize to median).	GPL570	1	brain, entorhinal cortex, male, 21 years	Homo sapiens	entorhinal cortex	66, C	male	21
GSM300253	PostcentralGyrus_male_21yrs_indiv66	RNA	Brain from cognitively intact individual.	GC-RMA expression values were obtained from CEL files using GeneSpring 7.3.1 software. PLIER expression values were obtained using Expression Console software using default settings. PLIER and GC-RMA data were processed using GeneSpring 7.0 software, with default normalizations (Data transformation:set values<0.01 to 0.01; per chip: normalize to 50th percentile; per gene: normalize to median).	GPL570	1	brain, postcentral gyrus, male, 21 years	Homo sapiens	postcentral gyrus	66, C	male	21
GSM300254	SuperiorFrontalGyrus_male_21yrs_indiv66	RNA	Brain from cognitively intact individual.	GC-RMA expression values were obtained from CEL files using GeneSpring 7.3.1 software. PLIER expression values were obtained using Expression Console software using default settings. PLIER and GC-RMA data were processed using GeneSpring 7.0 software, with default normalizations (Data transformation:set values<0.01 to 0.01; per chip: normalize to 50th percentile; per gene: normalize to median).	GPL570	1	brain, superior frontal gyrus, male, 21 years	Homo sapiens	superior frontal gyrus	66, C	male	21
GSM300255	Hippocampus_male_69yrs_indiv67	RNA	Brain from cognitively intact individual.	GC-RMA expression values were obtained from CEL files using GeneSpring 7.3.1 software. PLIER expression values were obtained using Expression Console software using default settings. PLIER and GC-RMA data were processed using GeneSpring 7.0 software, with default normalizations (Data transformation:set values<0.01 to 0.01; per chip: normalize to 50th percentile; per gene: normalize to median).	GPL570	1	brain, hippocampus, male, 69 years	Homo sapiens	hippocampus	67, C	male	69
GSM300256	PostcentralGyrus_male_69yrs_indiv67	RNA	Brain from cognitively intact individual.	GC-RMA expression values were obtained from CEL files using GeneSpring 7.3.1 software. PLIER expression values were obtained using Expression Console software using default settings. PLIER and GC-RMA data were processed using GeneSpring 7.0 software, with default normalizations (Data transformation:set values<0.01 to 0.01; per chip: normalize to 50th percentile; per gene: normalize to median).	GPL570	1	brain, postcentral gyrus, male, 69 years	Homo sapiens	postcentral gyrus	67, C	male	69
GSM300258	EntorhinalCortex_male_40yrs_indiv68	RNA	Brain from cognitively intact individual.	GC-RMA expression values were obtained from CEL files using GeneSpring 7.3.1 software. PLIER expression values were obtained using Expression Console software using default settings. PLIER and GC-RMA data were processed using GeneSpring 7.0 software, with default normalizations (Data transformation:set values<0.01 to 0.01; per chip: normalize to 50th percentile; per gene: normalize to median).	GPL570	1	brain, entorhinal cortex, male, 40 years	Homo sapiens	entorhinal cortex	68, C	male	40
GSM300259	PostcentralGyrus_male_40yrs_indiv68	RNA	Brain from cognitively intact individual.	GC-RMA expression values were obtained from CEL files using GeneSpring 7.3.1 software. PLIER expression values were obtained using Expression Console software using default settings. PLIER and GC-RMA data were processed using GeneSpring 7.0 software, with default normalizations (Data transformation:set values<0.01 to 0.01; per chip: normalize to 50th percentile; per gene: normalize to median).	GPL570	1	brain, postcentral gyrus, male, 40 years	Homo sapiens	postcentral gyrus	68, C	male	40
GSM300260	SuperiorFrontalGyrus_male_40yrs_indiv68	RNA	Brain from cognitively intact individual.	GC-RMA expression values were obtained from CEL files using GeneSpring 7.3.1 software. PLIER expression values were obtained using Expression Console software using default settings. PLIER and GC-RMA data were processed using GeneSpring 7.0 software, with default normalizations (Data transformation:set values<0.01 to 0.01; per chip: normalize to 50th percentile; per gene: normalize to median).	GPL570	1	brain, superior frontal gyrus, male, 40 years	Homo sapiens	superior frontal gyrus	68, C	male	40
GSM300261	EntorhinalCortex_male_52yrs_indiv71	RNA	Brain from cognitively intact individual.	GC-RMA expression values were obtained from CEL files using GeneSpring 7.3.1 software. PLIER expression values were obtained using Expression Console software using default settings. PLIER and GC-RMA data were processed using GeneSpring 7.0 software, with default normalizations (Data transformation:set values<0.01 to 0.01; per chip: normalize to 50th percentile; per gene: normalize to median).	GPL570	1	brain, entorhinal cortex, male, 52 years	Homo sapiens	entorhinal cortex	71, C	male	52
GSM300262	Hippocampus_male_52yrs_indiv71	RNA	Brain from cognitively intact individual.	GC-RMA expression values were obtained from CEL files using GeneSpring 7.3.1 software. PLIER expression values were obtained using Expression Console software using default settings. PLIER and GC-RMA data were processed using GeneSpring 7.0 software, with default normalizations (Data transformation:set values<0.01 to 0.01; per chip: normalize to 50th percentile; per gene: normalize to median).	GPL570	1	brain, hippocampus, male, 52 years	Homo sapiens	hippocampus	71, C	male	52
GSM300263	PostcentralGyrus_male_52yrs_indiv71	RNA	Brain from cognitively intact individual.	GC-RMA expression values were obtained from CEL files using GeneSpring 7.3.1 software. PLIER expression values were obtained using Expression Console software using default settings. PLIER and GC-RMA data were processed using GeneSpring 7.0 software, with default normalizations (Data transformation:set values<0.01 to 0.01; per chip: normalize to 50th percentile; per gene: normalize to median).	GPL570	1	brain, postcentral gyrus, male, 52 years	Homo sapiens	postcentral gyrus	71, C	male	52
GSM300264	SuperiorFrontalGyrus_male_52yrs_indiv71	RNA	Brain from cognitively intact individual.	GC-RMA expression values were obtained from CEL files using GeneSpring 7.3.1 software. PLIER expression values were obtained using Expression Console software using default settings. PLIER and GC-RMA data were processed using GeneSpring 7.0 software, with default normalizations (Data transformation:set values<0.01 to 0.01; per chip: normalize to 50th percentile; per gene: normalize to median).	GPL570	1	brain, superior frontal gyrus, male, 52 years	Homo sapiens	superior frontal gyrus	71, C	male	52
GSM300265	PostcentralGyrus_male_75yrs_indiv72	RNA	Brain from cognitively intact individual.	GC-RMA expression values were obtained from CEL files using GeneSpring 7.3.1 software. PLIER expression values were obtained using Expression Console software using default settings. PLIER and GC-RMA data were processed using GeneSpring 7.0 software, with default normalizations (Data transformation:set values<0.01 to 0.01; per chip: normalize to 50th percentile; per gene: normalize to median).	GPL570	1	brain, postcentral gyrus, male, 75 years	Homo sapiens	postcentral gyrus	72, C	male	75
GSM300266	SuperiorFrontalGyrus_male_75yrs_indiv72	RNA	Brain from cognitively intact individual.	GC-RMA expression values were obtained from CEL files using GeneSpring 7.3.1 software. PLIER expression values were obtained using Expression Console software using default settings. PLIER and GC-RMA data were processed using GeneSpring 7.0 software, with default normalizations (Data transformation:set values<0.01 to 0.01; per chip: normalize to 50th percentile; per gene: normalize to median).	GPL570	1	brain, superior frontal gyrus, male, 75 years	Homo sapiens	superior frontal gyrus	72, C	male	75
GSM300267	EntorhinalCortex_male_86yrs_indiv73	RNA	Brain from cognitively intact individual.	GC-RMA expression values were obtained from CEL files using GeneSpring 7.3.1 software. PLIER expression values were obtained using Expression Console software using default settings. PLIER and GC-RMA data were processed using GeneSpring 7.0 software, with default normalizations (Data transformation:set values<0.01 to 0.01; per chip: normalize to 50th percentile; per gene: normalize to median).	GPL570	1	brain, entorhinal cortex, male, 86 years	Homo sapiens	entorhinal cortex	73, C	male	86
GSM300268	Hippocampus_male_86yrs_indiv73	RNA	Brain from cognitively intact individual.	GC-RMA expression values were obtained from CEL files using GeneSpring 7.3.1 software. PLIER expression values were obtained using Expression Console software using default settings. PLIER and GC-RMA data were processed using GeneSpring 7.0 software, with default normalizations (Data transformation:set values<0.01 to 0.01; per chip: normalize to 50th percentile; per gene: normalize to median).	GPL570	1	brain, hippocampus, male, 86 years	Homo sapiens	hippocampus	73, C	male	86
GSM300269	PostcentralGyrus_male_86yrs_indiv73	RNA	Brain from cognitively intact individual.	GC-RMA expression values were obtained from CEL files using GeneSpring 7.3.1 software. PLIER expression values were obtained using Expression Console software using default settings. PLIER and GC-RMA data were processed using GeneSpring 7.0 software, with default normalizations (Data transformation:set values<0.01 to 0.01; per chip: normalize to 50th percentile; per gene: normalize to median).	GPL570	1	brain, postcentral gyrus, male, 86 years	Homo sapiens	postcentral gyrus	73, C	male	86
GSM300270	SuperiorFrontalGyrus_male_86yrs_indiv73	RNA	Brain from cognitively intact individual.	GC-RMA expression values were obtained from CEL files using GeneSpring 7.3.1 software. PLIER expression values were obtained using Expression Console software using default settings. PLIER and GC-RMA data were processed using GeneSpring 7.0 software, with default normalizations (Data transformation:set values<0.01 to 0.01; per chip: normalize to 50th percentile; per gene: normalize to median).	GPL570	1	brain, superior frontal gyrus, male, 86 years	Homo sapiens	superior frontal gyrus	73, C	male	86
GSM300271	EntorhinalCortex_female_26yrs_indiv76	RNA	Brain from cognitively intact individual.	GC-RMA expression values were obtained from CEL files using GeneSpring 7.3.1 software. PLIER expression values were obtained using Expression Console software using default settings. PLIER and GC-RMA data were processed using GeneSpring 7.0 software, with default normalizations (Data transformation:set values<0.01 to 0.01; per chip: normalize to 50th percentile; per gene: normalize to median).	GPL570	1	brain, entorhinal cortex, female, 26 years	Homo sapiens	entorhinal cortex	76, C	female	26
GSM300272	Hippocampus_female_26yrs_indiv76	RNA	Brain from cognitively intact individual.	GC-RMA expression values were obtained from CEL files using GeneSpring 7.3.1 software. PLIER expression values were obtained using Expression Console software using default settings. PLIER and GC-RMA data were processed using GeneSpring 7.0 software, with default normalizations (Data transformation:set values<0.01 to 0.01; per chip: normalize to 50th percentile; per gene: normalize to median).	GPL570	1	brain, hippocampus, female, 26 years	Homo sapiens	hippocampus	76, C	female	26
GSM300273	PostcentralGyrus_female_26yrs_indiv76	RNA	Brain from cognitively intact individual.	GC-RMA expression values were obtained from CEL files using GeneSpring 7.3.1 software. PLIER expression values were obtained using Expression Console software using default settings. PLIER and GC-RMA data were processed using GeneSpring 7.0 software, with default normalizations (Data transformation:set values<0.01 to 0.01; per chip: normalize to 50th percentile; per gene: normalize to median).	GPL570	1	brain, postcentral gyrus, female, 26 years	Homo sapiens	postcentral gyrus	76, C	female	26
GSM300274	SuperiorFrontalGyrus_female_26yrs_indiv76	RNA	Brain from cognitively intact individual.	GC-RMA expression values were obtained from CEL files using GeneSpring 7.3.1 software. PLIER expression values were obtained using Expression Console software using default settings. PLIER and GC-RMA data were processed using GeneSpring 7.0 software, with default normalizations (Data transformation:set values<0.01 to 0.01; per chip: normalize to 50th percentile; per gene: normalize to median).	GPL570	1	brain, superior frontal gyrus, female, 26 years	Homo sapiens	superior frontal gyrus	76, C	female	26
GSM300275	EntorhinalCortex_male_20yrs_indiv77	RNA	Brain from cognitively intact individual.	GC-RMA expression values were obtained from CEL files using GeneSpring 7.3.1 software. PLIER expression values were obtained using Expression Console software using default settings. PLIER and GC-RMA data were processed using GeneSpring 7.0 software, with default normalizations (Data transformation:set values<0.01 to 0.01; per chip: normalize to 50th percentile; per gene: normalize to median).	GPL570	1	brain, entorhinal cortex, male, 20 years	Homo sapiens	entorhinal cortex	77, C	male	20
GSM300276	Hippocampus_male_20yrs_indiv77	RNA	Brain from cognitively intact individual.	GC-RMA expression values were obtained from CEL files using GeneSpring 7.3.1 software. PLIER expression values were obtained using Expression Console software using default settings. PLIER and GC-RMA data were processed using GeneSpring 7.0 software, with default normalizations (Data transformation:set values<0.01 to 0.01; per chip: normalize to 50th percentile; per gene: normalize to median).	GPL570	1	brain, hippocampus, male, 20 years	Homo sapiens	hippocampus	77, C	male	20
GSM300277	PostcentralGyrus_male_20yrs_indiv77	RNA	Brain from cognitively intact individual.	GC-RMA expression values were obtained from CEL files using GeneSpring 7.3.1 software. PLIER expression values were obtained using Expression Console software using default settings. PLIER and GC-RMA data were processed using GeneSpring 7.0 software, with default normalizations (Data transformation:set values<0.01 to 0.01; per chip: normalize to 50th percentile; per gene: normalize to median).	GPL570	1	brain, postcentral gyrus, male, 20 years	Homo sapiens	postcentral gyrus	77, C	male	20
GSM300278	SuperiorFrontalGyrus_male_20yrs_indiv77	RNA	Brain from cognitively intact individual.	GC-RMA expression values were obtained from CEL files using GeneSpring 7.3.1 software. PLIER expression values were obtained using Expression Console software using default settings. PLIER and GC-RMA data were processed using GeneSpring 7.0 software, with default normalizations (Data transformation:set values<0.01 to 0.01; per chip: normalize to 50th percentile; per gene: normalize to median).	GPL570	1	brain, superior frontal gyrus, male, 20 years	Homo sapiens	superior frontal gyrus	77, C	male	20
GSM300279	EntorhinalCortex_male_20yrs_indiv78	RNA	Brain from cognitively intact individual.	GC-RMA expression values were obtained from CEL files using GeneSpring 7.3.1 software. PLIER expression values were obtained using Expression Console software using default settings. PLIER and GC-RMA data were processed using GeneSpring 7.0 software, with default normalizations (Data transformation:set values<0.01 to 0.01; per chip: normalize to 50th percentile; per gene: normalize to median).	GPL570	1	brain, entorhinal cortex, male, 20 years	Homo sapiens	entorhinal cortex	78, C	male	20
GSM300280	Hippocampus_male_20yrs_indiv78	RNA	Brain from cognitively intact individual.	GC-RMA expression values were obtained from CEL files using GeneSpring 7.3.1 software. PLIER expression values were obtained using Expression Console software using default settings. PLIER and GC-RMA data were processed using GeneSpring 7.0 software, with default normalizations (Data transformation:set values<0.01 to 0.01; per chip: normalize to 50th percentile; per gene: normalize to median).	GPL570	1	brain, hippocampus, male, 20 years	Homo sapiens	hippocampus	78, C	male	20
GSM300281	PostcentralGyrus_male_20yrs_indiv78	RNA	Brain from cognitively intact individual.	GC-RMA expression values were obtained from CEL files using GeneSpring 7.3.1 software. PLIER expression values were obtained using Expression Console software using default settings. PLIER and GC-RMA data were processed using GeneSpring 7.0 software, with default normalizations (Data transformation:set values<0.01 to 0.01; per chip: normalize to 50th percentile; per gene: normalize to median).	GPL570	1	brain, postcentral gyrus, male, 20 years	Homo sapiens	postcentral gyrus	78, C	male	20
GSM300282	SuperiorFrontalGyrus_male_20yrs_indiv78	RNA	Brain from cognitively intact individual.	GC-RMA expression values were obtained from CEL files using GeneSpring 7.3.1 software. PLIER expression values were obtained using Expression Console software using default settings. PLIER and GC-RMA data were processed using GeneSpring 7.0 software, with default normalizations (Data transformation:set values<0.01 to 0.01; per chip: normalize to 50th percentile; per gene: normalize to median).	GPL570	1	brain, superior frontal gyrus, male, 20 years	Homo sapiens	superior frontal gyrus	78, C	male	20
GSM300283	PostcentralGyrus_female_36yrs_indiv79	RNA	Brain from cognitively intact individual.	GC-RMA expression values were obtained from CEL files using GeneSpring 7.3.1 software. PLIER expression values were obtained using Expression Console software using default settings. PLIER and GC-RMA data were processed using GeneSpring 7.0 software, with default normalizations (Data transformation:set values<0.01 to 0.01; per chip: normalize to 50th percentile; per gene: normalize to median).	GPL570	1	brain, postcentral gyrus, female, 36 years	Homo sapiens	postcentral gyrus	79, AA	female	36
GSM300284	SuperiorFrontalGyrus_female_36yrs_indiv79	RNA	Brain from cognitively intact individual.	GC-RMA expression values were obtained from CEL files using GeneSpring 7.3.1 software. PLIER expression values were obtained using Expression Console software using default settings. PLIER and GC-RMA data were processed using GeneSpring 7.0 software, with default normalizations (Data transformation:set values<0.01 to 0.01; per chip: normalize to 50th percentile; per gene: normalize to median).	GPL570	1	brain, superior frontal gyrus, female, 36 years	Homo sapiens	superior frontal gyrus	79, AA	female	36
GSM300285	EntorhinalCortex_male_69yrs_indiv8	RNA	Brain from cognitively intact individual.	GC-RMA expression values were obtained from CEL files using GeneSpring 7.3.1 software. PLIER expression values were obtained using Expression Console software using default settings. PLIER and GC-RMA data were processed using GeneSpring 7.0 software, with default normalizations (Data transformation:set values<0.01 to 0.01; per chip: normalize to 50th percentile; per gene: normalize to median).	GPL570	1	brain, entorhinal cortex, male, 69 years	Homo sapiens	entorhinal cortex	8, C	male	69
GSM300286	Hippocampus_male_69yrs_indiv8	RNA	Brain from cognitively intact individual.	GC-RMA expression values were obtained from CEL files using GeneSpring 7.3.1 software. PLIER expression values were obtained using Expression Console software using default settings. PLIER and GC-RMA data were processed using GeneSpring 7.0 software, with default normalizations (Data transformation:set values<0.01 to 0.01; per chip: normalize to 50th percentile; per gene: normalize to median).	GPL570	1	brain, hippocampus, male, 69 years	Homo sapiens	hippocampus	8, C	male	69
GSM300287	PostcentralGyrus_male_69yrs_indiv8	RNA	Brain from cognitively intact individual.	GC-RMA expression values were obtained from CEL files using GeneSpring 7.3.1 software. PLIER expression values were obtained using Expression Console software using default settings. PLIER and GC-RMA data were processed using GeneSpring 7.0 software, with default normalizations (Data transformation:set values<0.01 to 0.01; per chip: normalize to 50th percentile; per gene: normalize to median).	GPL570	1	brain, postcentral gyrus, male, 69 years	Homo sapiens	postcentral gyrus	8, C	male	69
GSM300288	SuperiorFrontalGyrus_male_69yrs_indiv8	RNA	Brain from cognitively intact individual.	GC-RMA expression values were obtained from CEL files using GeneSpring 7.3.1 software. PLIER expression values were obtained using Expression Console software using default settings. PLIER and GC-RMA data were processed using GeneSpring 7.0 software, with default normalizations (Data transformation:set values<0.01 to 0.01; per chip: normalize to 50th percentile; per gene: normalize to median).	GPL570	1	brain, superior frontal gyrus, male, 69 years	Homo sapiens	superior frontal gyrus	8, C	male	69
GSM300289	EntorhinalCortex_female_44yrs_indiv80	RNA	Brain from cognitively intact individual.	GC-RMA expression values were obtained from CEL files using GeneSpring 7.3.1 software. PLIER expression values were obtained using Expression Console software using default settings. PLIER and GC-RMA data were processed using GeneSpring 7.0 software, with default normalizations (Data transformation:set values<0.01 to 0.01; per chip: normalize to 50th percentile; per gene: normalize to median).	GPL570	1	brain, entorhinal cortex, female, 44 years	Homo sapiens	entorhinal cortex	80, AA	female	44
GSM300290	Hippocampus_female_44yrs_indiv80	RNA	Brain from cognitively intact individual.	GC-RMA expression values were obtained from CEL files using GeneSpring 7.3.1 software. PLIER expression values were obtained using Expression Console software using default settings. PLIER and GC-RMA data were processed using GeneSpring 7.0 software, with default normalizations (Data transformation:set values<0.01 to 0.01; per chip: normalize to 50th percentile; per gene: normalize to median).	GPL570	1	brain, hippocampus, female, 44 years	Homo sapiens	hippocampus	80, AA	female	44
GSM300291	PostcentralGyrus_female_44yrs_indiv80	RNA	Brain from cognitively intact individual.	GC-RMA expression values were obtained from CEL files using GeneSpring 7.3.1 software. PLIER expression values were obtained using Expression Console software using default settings. PLIER and GC-RMA data were processed using GeneSpring 7.0 software, with default normalizations (Data transformation:set values<0.01 to 0.01; per chip: normalize to 50th percentile; per gene: normalize to median).	GPL570	1	brain, postcentral gyrus, female, 44 years	Homo sapiens	postcentral gyrus	80, AA	female	44
GSM300292	SuperiorFrontalGyrus_female_44yrs_indiv80	RNA	Brain from cognitively intact individual.	GC-RMA expression values were obtained from CEL files using GeneSpring 7.3.1 software. PLIER expression values were obtained using Expression Console software using default settings. PLIER and GC-RMA data were processed using GeneSpring 7.0 software, with default normalizations (Data transformation:set values<0.01 to 0.01; per chip: normalize to 50th percentile; per gene: normalize to median).	GPL570	1	brain, superior frontal gyrus, female, 44 years	Homo sapiens	superior frontal gyrus	80, AA	female	44
GSM300293	EntorhinalCortex_female_48yrs_indiv81	RNA	Brain from cognitively intact individual.	GC-RMA expression values were obtained from CEL files using GeneSpring 7.3.1 software. PLIER expression values were obtained using Expression Console software using default settings. PLIER and GC-RMA data were processed using GeneSpring 7.0 software, with default normalizations (Data transformation:set values<0.01 to 0.01; per chip: normalize to 50th percentile; per gene: normalize to median).	GPL570	1	brain, entorhinal cortex, female, 48 years	Homo sapiens	entorhinal cortex	81, AA	female	48
GSM300294	Hippocampus_female_48yrs_indiv81	RNA	Brain from cognitively intact individual.	GC-RMA expression values were obtained from CEL files using GeneSpring 7.3.1 software. PLIER expression values were obtained using Expression Console software using default settings. PLIER and GC-RMA data were processed using GeneSpring 7.0 software, with default normalizations (Data transformation:set values<0.01 to 0.01; per chip: normalize to 50th percentile; per gene: normalize to median).	GPL570	1	brain, hippocampus, female, 48 years	Homo sapiens	hippocampus	81, AA	female	48
GSM300295	PostcentralGyrus_female_48yrs_indiv81	RNA	Brain from cognitively intact individual.	GC-RMA expression values were obtained from CEL files using GeneSpring 7.3.1 software. PLIER expression values were obtained using Expression Console software using default settings. PLIER and GC-RMA data were processed using GeneSpring 7.0 software, with default normalizations (Data transformation:set values<0.01 to 0.01; per chip: normalize to 50th percentile; per gene: normalize to median).	GPL570	1	brain, postcentral gyrus, female, 48 years	Homo sapiens	postcentral gyrus	81, AA	female	48
GSM300296	SuperiorFrontalGyrus_female_48yrs_indiv81	RNA	Brain from cognitively intact individual.	GC-RMA expression values were obtained from CEL files using GeneSpring 7.3.1 software. PLIER expression values were obtained using Expression Console software using default settings. PLIER and GC-RMA data were processed using GeneSpring 7.0 software, with default normalizations (Data transformation:set values<0.01 to 0.01; per chip: normalize to 50th percentile; per gene: normalize to median).	GPL570	1	brain, superior frontal gyrus, female, 48 years	Homo sapiens	superior frontal gyrus	81, AA	female	48
GSM300297	EntorhinalCortex_female_30yrs_indiv82	RNA	Brain from cognitively intact individual.	GC-RMA expression values were obtained from CEL files using GeneSpring 7.3.1 software. PLIER expression values were obtained using Expression Console software using default settings. PLIER and GC-RMA data were processed using GeneSpring 7.0 software, with default normalizations (Data transformation:set values<0.01 to 0.01; per chip: normalize to 50th percentile; per gene: normalize to median).	GPL570	1	brain, entorhinal cortex, female, 30 years	Homo sapiens	entorhinal cortex	82, AA	female	30
GSM300298	Hippocampus_female_30yrs_indiv82	RNA	Brain from cognitively intact individual.	GC-RMA expression values were obtained from CEL files using GeneSpring 7.3.1 software. PLIER expression values were obtained using Expression Console software using default settings. PLIER and GC-RMA data were processed using GeneSpring 7.0 software, with default normalizations (Data transformation:set values<0.01 to 0.01; per chip: normalize to 50th percentile; per gene: normalize to median).	GPL570	1	brain, hippocampus, female, 30 years	Homo sapiens	hippocampus	82, AA	female	30
GSM300299	SuperiorFrontalGyrus_female_30yrs_indiv82	RNA	Brain from cognitively intact individual.	GC-RMA expression values were obtained from CEL files using GeneSpring 7.3.1 software. PLIER expression values were obtained using Expression Console software using default settings. PLIER and GC-RMA data were processed using GeneSpring 7.0 software, with default normalizations (Data transformation:set values<0.01 to 0.01; per chip: normalize to 50th percentile; per gene: normalize to median).	GPL570	1	brain, superior frontal gyrus, female, 30 years	Homo sapiens	superior frontal gyrus	82, AA	female	30
GSM300300	EntorhinalCortex_male_20yrs_indiv83	RNA	Brain from cognitively intact individual.	GC-RMA expression values were obtained from CEL files using GeneSpring 7.3.1 software. PLIER expression values were obtained using Expression Console software using default settings. PLIER and GC-RMA data were processed using GeneSpring 7.0 software, with default normalizations (Data transformation:set values<0.01 to 0.01; per chip: normalize to 50th percentile; per gene: normalize to median).	GPL570	1	brain, entorhinal cortex, male, 20 years	Homo sapiens	entorhinal cortex	83, C	male	20
GSM300301	Hippocampus_male_20yrs_indiv83	RNA	Brain from cognitively intact individual.	GC-RMA expression values were obtained from CEL files using GeneSpring 7.3.1 software. PLIER expression values were obtained using Expression Console software using default settings. PLIER and GC-RMA data were processed using GeneSpring 7.0 software, with default normalizations (Data transformation:set values<0.01 to 0.01; per chip: normalize to 50th percentile; per gene: normalize to median).	GPL570	1	brain, hippocampus, male, 20 years	Homo sapiens	hippocampus	83, C	male	20
GSM300302	PostcentralGyrus_male_20yrs_indiv83	RNA	Brain from cognitively intact individual.	GC-RMA expression values were obtained from CEL files using GeneSpring 7.3.1 software. PLIER expression values were obtained using Expression Console software using default settings. PLIER and GC-RMA data were processed using GeneSpring 7.0 software, with default normalizations (Data transformation:set values<0.01 to 0.01; per chip: normalize to 50th percentile; per gene: normalize to median).	GPL570	1	brain, postcentral gyrus, male, 20 years	Homo sapiens	postcentral gyrus	83, C	male	20
GSM300303	SuperiorFrontalGyrus_male_20yrs_indiv83	RNA	Brain from cognitively intact individual.	GC-RMA expression values were obtained from CEL files using GeneSpring 7.3.1 software. PLIER expression values were obtained using Expression Console software using default settings. PLIER and GC-RMA data were processed using GeneSpring 7.0 software, with default normalizations (Data transformation:set values<0.01 to 0.01; per chip: normalize to 50th percentile; per gene: normalize to median).	GPL570	1	brain, superior frontal gyrus, male, 20 years	Homo sapiens	superior frontal gyrus	83, C	male	20
GSM300304	EntorhinalCortex_male_33yrs_indiv84	RNA	Brain from cognitively intact individual.	GC-RMA expression values were obtained from CEL files using GeneSpring 7.3.1 software. PLIER expression values were obtained using Expression Console software using default settings. PLIER and GC-RMA data were processed using GeneSpring 7.0 software, with default normalizations (Data transformation:set values<0.01 to 0.01; per chip: normalize to 50th percentile; per gene: normalize to median).	GPL570	1	brain, entorhinal cortex, male, 33 years	Homo sapiens	entorhinal cortex	84, AA	male	33
GSM300305	Hippocampus_male_33yrs_indiv84	RNA	Brain from cognitively intact individual.	GC-RMA expression values were obtained from CEL files using GeneSpring 7.3.1 software. PLIER expression values were obtained using Expression Console software using default settings. PLIER and GC-RMA data were processed using GeneSpring 7.0 software, with default normalizations (Data transformation:set values<0.01 to 0.01; per chip: normalize to 50th percentile; per gene: normalize to median).	GPL570	1	brain, hippocampus, male, 33 years	Homo sapiens	hippocampus	84, AA	male	33
GSM300306	PostcentralGyrus_male_33yrs_indiv84	RNA	Brain from cognitively intact individual.	GC-RMA expression values were obtained from CEL files using GeneSpring 7.3.1 software. PLIER expression values were obtained using Expression Console software using default settings. PLIER and GC-RMA data were processed using GeneSpring 7.0 software, with default normalizations (Data transformation:set values<0.01 to 0.01; per chip: normalize to 50th percentile; per gene: normalize to median).	GPL570	1	brain, postcentral gyrus, male, 33 years	Homo sapiens	postcentral gyrus	84, AA	male	33
GSM300307	SuperiorFrontalGyrus_male_33yrs_indiv84	RNA	Brain from cognitively intact individual.	GC-RMA expression values were obtained from CEL files using GeneSpring 7.3.1 software. PLIER expression values were obtained using Expression Console software using default settings. PLIER and GC-RMA data were processed using GeneSpring 7.0 software, with default normalizations (Data transformation:set values<0.01 to 0.01; per chip: normalize to 50th percentile; per gene: normalize to median).	GPL570	1	brain, superior frontal gyrus, male, 33 years	Homo sapiens	superior frontal gyrus	84, AA	male	33
GSM300308	EntorhinalCortex_male_22yrs_indiv85	RNA	Brain from cognitively intact individual.	GC-RMA expression values were obtained from CEL files using GeneSpring 7.3.1 software. PLIER expression values were obtained using Expression Console software using default settings. PLIER and GC-RMA data were processed using GeneSpring 7.0 software, with default normalizations (Data transformation:set values<0.01 to 0.01; per chip: normalize to 50th percentile; per gene: normalize to median).	GPL570	1	brain, entorhinal cortex, male, 22 years	Homo sapiens	entorhinal cortex	85, C	male	22
GSM300309	Hippocampus_male_22yrs_indiv85	RNA	Brain from cognitively intact individual.	GC-RMA expression values were obtained from CEL files using GeneSpring 7.3.1 software. PLIER expression values were obtained using Expression Console software using default settings. PLIER and GC-RMA data were processed using GeneSpring 7.0 software, with default normalizations (Data transformation:set values<0.01 to 0.01; per chip: normalize to 50th percentile; per gene: normalize to median).	GPL570	1	brain, hippocampus, male, 22 years	Homo sapiens	hippocampus	85, C	male	22
GSM300310	PostcentralGyrus_male_22yrs_indiv85	RNA	Brain from cognitively intact individual.	GC-RMA expression values were obtained from CEL files using GeneSpring 7.3.1 software. PLIER expression values were obtained using Expression Console software using default settings. PLIER and GC-RMA data were processed using GeneSpring 7.0 software, with default normalizations (Data transformation:set values<0.01 to 0.01; per chip: normalize to 50th percentile; per gene: normalize to median).	GPL570	1	brain, postcentral gyrus, male, 22 years	Homo sapiens	postcentral gyrus	85, C	male	22
GSM300311	SuperiorFrontalGyrus_male_22yrs_indiv85	RNA	Brain from cognitively intact individual.	GC-RMA expression values were obtained from CEL files using GeneSpring 7.3.1 software. PLIER expression values were obtained using Expression Console software using default settings. PLIER and GC-RMA data were processed using GeneSpring 7.0 software, with default normalizations (Data transformation:set values<0.01 to 0.01; per chip: normalize to 50th percentile; per gene: normalize to median).	GPL570	1	brain, superior frontal gyrus, male, 22 years	Homo sapiens	superior frontal gyrus	85, C	male	22
GSM300312	EntorhinalCortex_male_42yrs_indiv86	RNA	Brain from cognitively intact individual.	GC-RMA expression values were obtained from CEL files using GeneSpring 7.3.1 software. PLIER expression values were obtained using Expression Console software using default settings. PLIER and GC-RMA data were processed using GeneSpring 7.0 software, with default normalizations (Data transformation:set values<0.01 to 0.01; per chip: normalize to 50th percentile; per gene: normalize to median).	GPL570	1	brain, entorhinal cortex, male, 42 years	Homo sapiens	entorhinal cortex	86, AA	male	42
GSM300313	Hippocampus_male_42yrs_indiv86	RNA	Brain from cognitively intact individual.	GC-RMA expression values were obtained from CEL files using GeneSpring 7.3.1 software. PLIER expression values were obtained using Expression Console software using default settings. PLIER and GC-RMA data were processed using GeneSpring 7.0 software, with default normalizations (Data transformation:set values<0.01 to 0.01; per chip: normalize to 50th percentile; per gene: normalize to median).	GPL570	1	brain, hippocampus, male, 42 years	Homo sapiens	hippocampus	86, AA	male	42
GSM300314	PostcentralGyrus_male_42yrs_indiv86	RNA	Brain from cognitively intact individual.	GC-RMA expression values were obtained from CEL files using GeneSpring 7.3.1 software. PLIER expression values were obtained using Expression Console software using default settings. PLIER and GC-RMA data were processed using GeneSpring 7.0 software, with default normalizations (Data transformation:set values<0.01 to 0.01; per chip: normalize to 50th percentile; per gene: normalize to median).	GPL570	1	brain, postcentral gyrus, male, 42 years	Homo sapiens	postcentral gyrus	86, AA	male	42
GSM300315	SuperiorFrontalGyrus_male_42yrs_indiv86	RNA	Brain from cognitively intact individual.	GC-RMA expression values were obtained from CEL files using GeneSpring 7.3.1 software. PLIER expression values were obtained using Expression Console software using default settings. PLIER and GC-RMA data were processed using GeneSpring 7.0 software, with default normalizations (Data transformation:set values<0.01 to 0.01; per chip: normalize to 50th percentile; per gene: normalize to median).	GPL570	1	brain, superior frontal gyrus, male, 42 years	Homo sapiens	superior frontal gyrus	86, AA	male	42
GSM300316	EntorhinalCortex_male_45yrs_indiv87	RNA	Brain from cognitively intact individual.	GC-RMA expression values were obtained from CEL files using GeneSpring 7.3.1 software. PLIER expression values were obtained using Expression Console software using default settings. PLIER and GC-RMA data were processed using GeneSpring 7.0 software, with default normalizations (Data transformation:set values<0.01 to 0.01; per chip: normalize to 50th percentile; per gene: normalize to median).	GPL570	1	brain, entorhinal cortex, male, 45 years	Homo sapiens	entorhinal cortex	87, C	male	45
GSM300317	Hippocampus_male_45yrs_indiv87	RNA	Brain from cognitively intact individual.	GC-RMA expression values were obtained from CEL files using GeneSpring 7.3.1 software. PLIER expression values were obtained using Expression Console software using default settings. PLIER and GC-RMA data were processed using GeneSpring 7.0 software, with default normalizations (Data transformation:set values<0.01 to 0.01; per chip: normalize to 50th percentile; per gene: normalize to median).	GPL570	1	brain, hippocampus, male, 45 years	Homo sapiens	hippocampus	87, C	male	45
GSM300318	PostcentralGyrus_male_45yrs_indiv87	RNA	Brain from cognitively intact individual.	GC-RMA expression values were obtained from CEL files using GeneSpring 7.3.1 software. PLIER expression values were obtained using Expression Console software using default settings. PLIER and GC-RMA data were processed using GeneSpring 7.0 software, with default normalizations (Data transformation:set values<0.01 to 0.01; per chip: normalize to 50th percentile; per gene: normalize to median).	GPL570	1	brain, postcentral gyrus, male, 45 years	Homo sapiens	postcentral gyrus	87, C	male	45
GSM300319	SuperiorFrontalGyrus_male_45yrs_indiv87	RNA	Brain from cognitively intact individual.	GC-RMA expression values were obtained from CEL files using GeneSpring 7.3.1 software. PLIER expression values were obtained using Expression Console software using default settings. PLIER and GC-RMA data were processed using GeneSpring 7.0 software, with default normalizations (Data transformation:set values<0.01 to 0.01; per chip: normalize to 50th percentile; per gene: normalize to median).	GPL570	1	brain, superior frontal gyrus, male, 45 years	Homo sapiens	superior frontal gyrus	87, C	male	45
GSM300320	EntorhinalCortex_female_47yrs_indiv88	RNA	Brain from cognitively intact individual.	GC-RMA expression values were obtained from CEL files using GeneSpring 7.3.1 software. PLIER expression values were obtained using Expression Console software using default settings. PLIER and GC-RMA data were processed using GeneSpring 7.0 software, with default normalizations (Data transformation:set values<0.01 to 0.01; per chip: normalize to 50th percentile; per gene: normalize to median).	GPL570	1	brain, entorhinal cortex, female, 47 years	Homo sapiens	entorhinal cortex	88, AA	female	47
GSM300321	Hippocampus_female_47yrs_indiv88	RNA	Brain from cognitively intact individual.	GC-RMA expression values were obtained from CEL files using GeneSpring 7.3.1 software. PLIER expression values were obtained using Expression Console software using default settings. PLIER and GC-RMA data were processed using GeneSpring 7.0 software, with default normalizations (Data transformation:set values<0.01 to 0.01; per chip: normalize to 50th percentile; per gene: normalize to median).	GPL570	1	brain, hippocampus, female, 47 years	Homo sapiens	hippocampus	88, AA	female	47
GSM300322	PostcentralGyrus_female_47yrs_indiv88	RNA	Brain from cognitively intact individual.	GC-RMA expression values were obtained from CEL files using GeneSpring 7.3.1 software. PLIER expression values were obtained using Expression Console software using default settings. PLIER and GC-RMA data were processed using GeneSpring 7.0 software, with default normalizations (Data transformation:set values<0.01 to 0.01; per chip: normalize to 50th percentile; per gene: normalize to median).	GPL570	1	brain, postcentral gyrus, female, 47 years	Homo sapiens	postcentral gyrus	88, AA	female	47
GSM300323	SuperiorFrontalGyrus_female_47yrs_indiv88	RNA	Brain from cognitively intact individual.	GC-RMA expression values were obtained from CEL files using GeneSpring 7.3.1 software. PLIER expression values were obtained using Expression Console software using default settings. PLIER and GC-RMA data were processed using GeneSpring 7.0 software, with default normalizations (Data transformation:set values<0.01 to 0.01; per chip: normalize to 50th percentile; per gene: normalize to median).	GPL570	1	brain, superior frontal gyrus, female, 47 years	Homo sapiens	superior frontal gyrus	88, AA	female	47
GSM300324	EntorhinalCortex_male_69yrs_indiv93	RNA	Brain from cognitively intact individual.	GC-RMA expression values were obtained from CEL files using GeneSpring 7.3.1 software. PLIER expression values were obtained using Expression Console software using default settings. PLIER and GC-RMA data were processed using GeneSpring 7.0 software, with default normalizations (Data transformation:set values<0.01 to 0.01; per chip: normalize to 50th percentile; per gene: normalize to median).	GPL570	1	brain, entorhinal cortex, male, 69 years	Homo sapiens	entorhinal cortex	93, C	male	69
GSM300325	Hippocampus_male_69yrs_indiv93	RNA	Brain from cognitively intact individual.	GC-RMA expression values were obtained from CEL files using GeneSpring 7.3.1 software. PLIER expression values were obtained using Expression Console software using default settings. PLIER and GC-RMA data were processed using GeneSpring 7.0 software, with default normalizations (Data transformation:set values<0.01 to 0.01; per chip: normalize to 50th percentile; per gene: normalize to median).	GPL570	1	brain, hippocampus, male, 69 years	Homo sapiens	hippocampus	93, C	male	69
GSM300326	PostcentralGyrus_male_69yrs_indiv93	RNA	Brain from cognitively intact individual.	GC-RMA expression values were obtained from CEL files using GeneSpring 7.3.1 software. PLIER expression values were obtained using Expression Console software using default settings. PLIER and GC-RMA data were processed using GeneSpring 7.0 software, with default normalizations (Data transformation:set values<0.01 to 0.01; per chip: normalize to 50th percentile; per gene: normalize to median).	GPL570	1	brain, postcentral gyrus, male, 69 years	Homo sapiens	postcentral gyrus	93, C	male	69
GSM300327	SuperiorFrontalGyrus_male_69yrs_indiv93	RNA	Brain from cognitively intact individual.	GC-RMA expression values were obtained from CEL files using GeneSpring 7.3.1 software. PLIER expression values were obtained using Expression Console software using default settings. PLIER and GC-RMA data were processed using GeneSpring 7.0 software, with default normalizations (Data transformation:set values<0.01 to 0.01; per chip: normalize to 50th percentile; per gene: normalize to median).	GPL570	1	brain, superior frontal gyrus, male, 69 years	Homo sapiens	superior frontal gyrus	93, C	male	69
GSM300328	EntorhinalCortex_female_91yrs_indiv94	RNA	Brain from cognitively intact individual.	GC-RMA expression values were obtained from CEL files using GeneSpring 7.3.1 software. PLIER expression values were obtained using Expression Console software using default settings. PLIER and GC-RMA data were processed using GeneSpring 7.0 software, with default normalizations (Data transformation:set values<0.01 to 0.01; per chip: normalize to 50th percentile; per gene: normalize to median).	GPL570	1	brain, entorhinal cortex, female, 91 years	Homo sapiens	entorhinal cortex	94, C	female	91
GSM300329	Hippocampus_female_91yrs_indiv94	RNA	Brain from cognitively intact individual.	GC-RMA expression values were obtained from CEL files using GeneSpring 7.3.1 software. PLIER expression values were obtained using Expression Console software using default settings. PLIER and GC-RMA data were processed using GeneSpring 7.0 software, with default normalizations (Data transformation:set values<0.01 to 0.01; per chip: normalize to 50th percentile; per gene: normalize to median).	GPL570	1	brain, hippocampus, female, 91 years	Homo sapiens	hippocampus	94, C	female	91
GSM300330	PostcentralGyrus_female_91yrs_indiv94	RNA	Brain from cognitively intact individual.	GC-RMA expression values were obtained from CEL files using GeneSpring 7.3.1 software. PLIER expression values were obtained using Expression Console software using default settings. PLIER and GC-RMA data were processed using GeneSpring 7.0 software, with default normalizations (Data transformation:set values<0.01 to 0.01; per chip: normalize to 50th percentile; per gene: normalize to median).	GPL570	1	brain, postcentral gyrus, female, 91 years	Homo sapiens	postcentral gyrus	94, C	female	91
GSM300331	SuperiorFrontalGyrus_female_91yrs_indiv94	RNA	Brain from cognitively intact individual.	GC-RMA expression values were obtained from CEL files using GeneSpring 7.3.1 software. PLIER expression values were obtained using Expression Console software using default settings. PLIER and GC-RMA data were processed using GeneSpring 7.0 software, with default normalizations (Data transformation:set values<0.01 to 0.01; per chip: normalize to 50th percentile; per gene: normalize to median).	GPL570	1	brain, superior frontal gyrus, female, 91 years	Homo sapiens	superior frontal gyrus	94, C	female	91
GSM300332	EntorhinalCortex_male_75yrs_indiv96	RNA	Brain from cognitively intact individual.	GC-RMA expression values were obtained from CEL files using GeneSpring 7.3.1 software. PLIER expression values were obtained using Expression Console software using default settings. PLIER and GC-RMA data were processed using GeneSpring 7.0 software, with default normalizations (Data transformation:set values<0.01 to 0.01; per chip: normalize to 50th percentile; per gene: normalize to median).	GPL570	1	brain, entorhinal cortex, male, 75 years	Homo sapiens	entorhinal cortex	96, C	male	75
GSM300333	Hippocampus_male_75yrs_indiv96	RNA	Brain from cognitively intact individual.	GC-RMA expression values were obtained from CEL files using GeneSpring 7.3.1 software. PLIER expression values were obtained using Expression Console software using default settings. PLIER and GC-RMA data were processed using GeneSpring 7.0 software, with default normalizations (Data transformation:set values<0.01 to 0.01; per chip: normalize to 50th percentile; per gene: normalize to median).	GPL570	1	brain, hippocampus, male, 75 years	Homo sapiens	hippocampus	96, C	male	75
GSM300335	SuperiorFrontalGyrus_male_75yrs_indiv96	RNA	Brain from cognitively intact individual.	GC-RMA expression values were obtained from CEL files using GeneSpring 7.3.1 software. PLIER expression values were obtained using Expression Console software using default settings. PLIER and GC-RMA data were processed using GeneSpring 7.0 software, with default normalizations (Data transformation:set values<0.01 to 0.01; per chip: normalize to 50th percentile; per gene: normalize to median).	GPL570	1	brain, superior frontal gyrus, male, 75 years	Homo sapiens	superior frontal gyrus	96, C	male	75
GSM300338	EntorhinalCortex_female_82yrs_indiv98	RNA	Brain from cognitively intact individual.	GC-RMA expression values were obtained from CEL files using GeneSpring 7.3.1 software. PLIER expression values were obtained using Expression Console software using default settings. PLIER and GC-RMA data were processed using GeneSpring 7.0 software, with default normalizations (Data transformation:set values<0.01 to 0.01; per chip: normalize to 50th percentile; per gene: normalize to median).	GPL570	1	brain, entorhinal cortex, female, 82 years	Homo sapiens	entorhinal cortex	98, C	female	82
GSM300339	Hippocampus_female_82yrs_indiv98	RNA	Brain from cognitively intact individual.	GC-RMA expression values were obtained from CEL files using GeneSpring 7.3.1 software. PLIER expression values were obtained using Expression Console software using default settings. PLIER and GC-RMA data were processed using GeneSpring 7.0 software, with default normalizations (Data transformation:set values<0.01 to 0.01; per chip: normalize to 50th percentile; per gene: normalize to median).	GPL570	1	brain, hippocampus, female, 82 years	Homo sapiens	hippocampus	98, C	female	82
GSM300340	PostcentralGyrus_female_82yrs_indiv98	RNA	Brain from cognitively intact individual.	GC-RMA expression values were obtained from CEL files using GeneSpring 7.3.1 software. PLIER expression values were obtained using Expression Console software using default settings. PLIER and GC-RMA data were processed using GeneSpring 7.0 software, with default normalizations (Data transformation:set values<0.01 to 0.01; per chip: normalize to 50th percentile; per gene: normalize to median).	GPL570	1	brain, postcentral gyrus, female, 82 years	Homo sapiens	postcentral gyrus	98, C	female	82
GSM300341	SuperiorFrontalGyrus_female_82yrs_indiv98	RNA	Brain from cognitively intact individual.	GC-RMA expression values were obtained from CEL files using GeneSpring 7.3.1 software. PLIER expression values were obtained using Expression Console software using default settings. PLIER and GC-RMA data were processed using GeneSpring 7.0 software, with default normalizations (Data transformation:set values<0.01 to 0.01; per chip: normalize to 50th percentile; per gene: normalize to median).	GPL570	1	brain, superior frontal gyrus, female, 82 years	Homo sapiens	superior frontal gyrus	98, C	female	82
GSM318840	SuperiorFrontalGyrus_male_66yrs_indiv63	RNA	Postmortem brain tissue from cognitively intact individual.	GC-RMA expression values were obtained from CEL files using GeneSpring 7.3.1 software. PLIER expression values were obtained using Expression Console software using default settings. PLIER and GC-RMA data were processed using GeneSpring 7.0 software, with default normalizations (Data transformation:set values<0.01 to 0.01; per chip: normalize to 50th percentile; per gene: normalize to median).	GPL570	1	brain, superior frontal gyrus, male, 66 years	Homo sapiens	superior frontal gyrus	63, C	male	66
GSM350078	SuperiorFrontalGyrus_male_80yrs_indiv15	RNA	Brain from cognitively intact individual.	GC-RMA expression values were obtained from CEL files using GeneSpring 7.3.1 software. PLIER expression values were obtained using Expression Console software using default settings. PLIER and GC-RMA data were processed using GeneSpring 7.0 software, with default normalizations (Data transformation:set values<0.01 to 0.01; per chip: normalize to 50th percentile; per gene: normalize to median).	GPL570	1	brain, superior frontal gyrus, male, 80 years	Homo sapiens	superior frontal gyrus	15, C	male	80
